# Supplementary material
Source: PubMed Central journal article supplement (PMC2828530)

# Synthesis, Structural Analysis, and Reactivity of Bridged Orthoamides by Intramolecular Schmidt Reaction

Michal Szostak and Jeffrey Aubé\*

*Department of Medicinal Chemistry, 1251 Wescoe Hall Drive, Malott Hall, Room 4070,  
University of Kansas, Lawrence, Kansas 66045-7582*

*jaube@ku.edu*

## Supporting Information

|                                                               |    |
|---------------------------------------------------------------|----|
| Table of Contents                                             | 1  |
| List of Known Compounds                                       | 2  |
| Experimental Procedures and Characterization Data             | 2  |
| • Preparation of Starting Materials                           | 2  |
| • Synthesis of Bridged Orthoamides                            | 11 |
| • Transformations of Bridged $\alpha$ -Amino Ketals           | 19 |
| References                                                    | 23 |
| $^1\text{H}$ and $^{13}\text{C}$ NMR Spectra of New Compounds | 24 |

### Corresponding Author:

Professor Jeffrey Aubé\*  
Department of Medicinal Chemistry  
University of Kansas  
Structural Biology Center  
2121 Simons Drive, West Campus  
Lawrence, Kansas 66047

Tel: 1.785.864.4496  
Fax: 1.785.864.5326  
E-mail: jaube@ku.edu

## List of Known Compounds

The following compounds are known: azides **1A**, **1G**, **1H**, **1I**, **1J**, **1K**,<sup>1,2</sup> **1L**, **1M**,<sup>3</sup> **1n**,<sup>4</sup> 2-allyl-2-phenylcyclohexanone,<sup>5</sup> enamine **5**.<sup>6</sup> 2-Allyl-2-phenylcyclohexanone was prepared by alkylation of the commercially available 2-phenyl cyclohexanone with allyl bromide according to the reported procedure.<sup>1</sup>

## Preparation of Starting Materials

Scheme A. Synthesis of azido ketal **1a** (Table 1)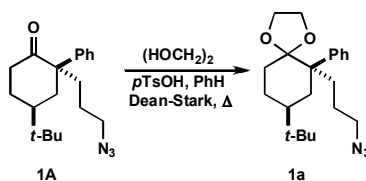**(6R,8S)-6-(3-Azidopropyl)-8-tert-butyl-6-phenyl-1,4-dioxaspiro[4.5]decane**

**(1a)**. To a solution of azide **1A** (0.16 g, 0.50 mmol) in benzene (10 mL), ethylene glycol (2 mL) was added followed by pTsOH (5 mg, 0.05 mmol) and the resulting mixture was heated under Dean-Stark apparatus for 6 h. The reaction was cooled to rt, diluted with Et<sub>2</sub>O (20 mL), sat. NaHCO<sub>3</sub> (10 mL) and brine (10 mL), extracted with Et<sub>2</sub>O (3 x 30 mL), dried and concentrated. Chromatography (1/40 EtOAc/hexanes) afforded the title compound as oil (R<sub>f</sub> = 0.55, 1/10 EtOAc/hexanes). Yield 81% (0.14 g, 0.40 mmol). <sup>1</sup>H NMR (400 MHz, CDCl<sub>3</sub>) δ 0.98 (s, 9H), 1.02-1.14 (m, 1H), 1.27-1.49 (m, 3H), 1.65-1.72 (m, 1H), 1.76-1.88 (m, 2H), 1.92-2.15 (m, 3H), 2.28 (td, *J* = 3.4, 13.1 Hz, 1H), 2.64 (qd, *J* = 1.0, 7.1 Hz, 1H), 3.16-3.28 (m, 2H), 3.51-3.56 (m, 1H), 3.58-3.63 (m, 1H), 3.75 (qd, *J* = 0.8, 7.2 Hz, 1H), 7.22 (tt, *J* = 1.0, 7.2 Hz, 1H), 7.28-7.34 (m, 2H), 7.54 (dd, *J* = 0.8, 8.2 Hz, 2H); <sup>13</sup>C NMR (100 MHz, CDCl<sub>3</sub>) δ 22.9, 24.6, 27.7, 29.3, 31.0, 32.5, 32.8, 41.3, 48.6, 52.1, 64.8, 65.1, 112.3, 126.0, 127.4, 128.6, 142.8; IR (neat) 2960, 2870, 2096, 1469, 1366, 1263, 1153, 1088, 1034, 950 cm<sup>-1</sup>; HRMS calcd for C<sub>21</sub>H<sub>31</sub>N<sub>3</sub>O<sub>2</sub>Na (M<sup>+</sup> + Na) 380.2314, found 380.2311.

Scheme B. Synthesis of azido ketal **1b** (Table 1)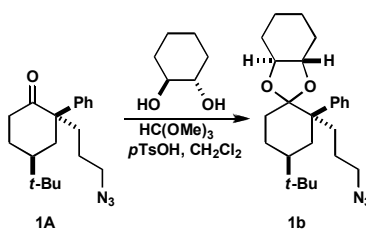

**(2'R,3aS,4'S,7aS)-2'-(3-Azidopropyl)-4'-tert-butyl-2'-phenylhexahydrospiro[benzo[d][1,3]dioxole-2,1'-cyclohexane] (1b)**. To a solution of azide **1A** (0.0483 g, 0.15

mmol, 1.0 equiv) in  $\text{CH}_2\text{Cl}_2$  (5 mL) trans-1,2-cyclohexanediol (0.12 g, 1.05 mmol, 7.0 equiv) was added, followed by *p*TsOH (4 mg, 0.1 equiv) and trimethyl orthoformate (0.082 g, 0.75 mmol, 5.0 equiv). The resulting mixture was stirred at rt for 15 h, concentrated and purified directly by chromatography (1/100 EtOAc/hexanes) to afford the title compound as oil ( $R_f = 0.44$ - $0.46$ , 1/10 EtOAc/hexanes) as a mixture of two diastereoisomers (dr = 71:29, less polar:more polar). Further purification by PTLC (1/10 EtOAc/hexanes) afforded a sample consisting of 9:1 mixture of less polar:more polar diastereoisomer and a sample consisting of 1:5 mixture of less polar:more polar diastereoisomer. Less polar diastereoisomer:  $^1\text{H}$  NMR (400 MHz,  $\text{CDCl}_3$ )  $\delta$  0.69-0.82 (m, 1H), 0.99 (s, 9H), 1.04-1.18 (m, 4H), 1.31-1.48 (m, 4H), 1.50-1.66 (m, 2H), 1.69-1.84 (m, 4H), 1.96-2.17 (m, 4H), 2.27 (td,  $J = 3.4, 13.5$  Hz, 1H), 3.13-3.29 (m, 3H); 7.22 (tt,  $J = 2.0, 7.2$  Hz, 1H), 7.27-7.33 (m, 2H), 7.53-7.59 (m, 2H);  $^{13}\text{C}$  NMR (100 MHz,  $\text{CDCl}_3$ )  $\delta$  22.8, 23.5, 23.6, 24.3, 27.7, 28.3, 29.0, 29.4, 31.1, 32.5, 34.0, 41.5, 48.7, 52.1, 79.9, 79.9, 111.4, 126.1, 127.0, 129.2, 142.3; IR (neat) 2945, 2869, 2095, 1445, 1365, 1262, 1216, 1184, 1115, 1068, 913  $\text{cm}^{-1}$ ; HRMS calcd for  $\text{C}_{25}\text{H}_{38}\text{NO}_2$  ( $\text{M}^+ + \text{H} - \text{N}_2$ ) 384.2903, found 384.2896. More polar diastereoisomer:  $^1\text{H}$  NMR (400 MHz,  $\text{CDCl}_3$ )  $\delta$  0.72 (qd,  $J = 3.8, 11.8$  Hz, 1H), 0.82-0.94 (m, 2H), 0.96 (s, 9H), 1.04-1.25 (m, 4H), 1.33-1.51 (m, 3H), 1.68-1.82 (m, 3H), 1.84-2.02 (m, 3H), 2.06-2.20 (m, 3H), 2.85 (td,  $J = 3.4, 15.0$  Hz, 1H), 3.06-3.13 (m, 1H), 3.21-3.32 (m, 2H), 7.18-7.24 (m, 1H), 7.28-7.33 (m, 2H), 7.51-7.55 (m, 2H);  $^{13}\text{C}$  NMR (100 MHz,  $\text{CDCl}_3$ )  $\delta$  22.9, 23.5, 23.5, 24.7, 27.7, 28.3, 28.7, 29.4, 30.9, 32.5, 32.8, 40.9, 48.8, 52.1, 79.1, 80.5, 111.7, 126.0, 127.2, 129.1, 142.4; IR (neat) 2944, 2869, 2095, 1445, 1365, 1262, 1216, 1186, 1136, 1115, 913  $\text{cm}^{-1}$ ; HRMS calcd for  $\text{C}_{25}\text{H}_{38}\text{NO}_2$  ( $\text{M}^+ + \text{H} - \text{N}_2$ ) 384.2903, found 384.2875.

### Scheme C. Synthesis of azido ketal **1c** (Table 1)

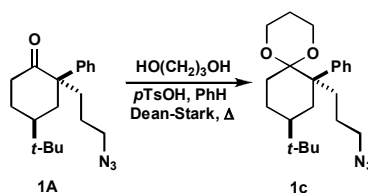

**(7R,9S)-7-(3-Azidopropyl)-9-tert-butyl-7-phenyl-1,5-dioxaspiro[5.5]undecane (1c).** According to the procedure described for **1a**, the reaction of **1A** (0.0508 g, 0.16 mmol), 1,3-propanediol (2 mL) and *p*TsOH (3 mg, 0.1 mmol) in benzene (10 mL) under Dean-Stark apparatus for 6 h afforded after chromatography (1/100 EtOAc/hexanes) the title compound as oil ( $R_f = 0.53$ , 1/10 EtOAc/hexanes). Yield 72% (0.0428 g, 0.12 mmol).  $^1\text{H}$  NMR (400 MHz,  $\text{CDCl}_3$ )  $\delta$  0.88-0.95 (m, 1H), 0.98 (s, 9H), 1.11-1.25 (m, 2H), 1.29-1.45 (m, 2H), 1.49-1.63 (m, 2H), 1.67-1.73 (m, 1H), 1.79 (tt,  $J = 2.4, 13.0$  Hz, 1H), 1.92-12.04 (m, 2H), 2.17 (td,  $J = 3.5, 13.0$  Hz, 1H), 2.76 (tt,  $J = 3.4, 14.2$  Hz, 1H), 2.09-3.23 (m, 2H), 3.47-3.53 (m, 1H), 3.76-3.84 (m, 2H), 4.01 (td,  $J = 2.8, 11.8$  Hz, 1H), 7.18-7.24 (m, 1H), 7.26-7.33 (m, 2H), 7.58-7.63 (m, 2H);  $^{13}\text{C}$  NMR (100 MHz,  $\text{CDCl}_3$ )  $\delta$  23.0, 23.1, 24.2, 25.1, 27.7, 29.6, 29.8, 32.5, 41.8, 49.4, 52.2, 58.8, 59.3, 100.5, 125.4, 126.9, 128.9, 144.3; IR (neat) 2961, 2867, 2095, 1467, 1366, 1245, 1179, 1139, 1115,

1098, 990, 913  $\text{cm}^{-1}$ ; HRMS calcd for  $\text{C}_{22}\text{H}_{33}\text{N}_3\text{O}_2\text{Na}$  ( $\text{M}^+ + \text{Na}$ ) 394.2470, found 394.2485.

**Scheme D. Synthesis of azido ketal **1d** (Table 1)**

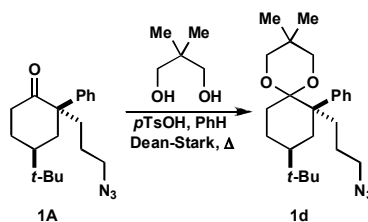

**((7R,9S)-7-(3-Azidopropyl)-9-tert-butyl-3,3-dimethyl-7-phenyl-1,5-dioxaspiro[5.5]undecane (1d).** According to the procedure described for **1a**, the reaction of **1A** (0.0551 g, 0.175 mmol), neopentyl glycol (0.36 g, 3.5 mmol, 20 equiv) and *p*TsOH (3 mg, 0.1 mmol) in benzene (10 mL) under Dean-Stark apparatus for 12 h afforded after chromatography (1/100 EtOAc/hexanes) the title compound as oil ( $R_f = 0.55$ , 1/10 EtOAc/hexanes). Yield 60% (0.0418 g, 0.11 mmol).  $^1\text{H}$  NMR (400 MHz,  $\text{CDCl}_3$ )  $\delta$  0.40 (s, 3H), 0.60 (s, 3H), 0.97 (s, 9H), 0.99-1.10 (m, 1H), 1.21 (td,  $J = 4.1, 13.2$  Hz, 1H), 1.27-1.54 (m, 3H), 1.66-1.78 (m, 2H), 1.99-2.14 (m, 2H), 2.27 (td,  $J = 3.5, 13.7$  Hz, 1H), 2.72 (tt,  $J = 3.4, 14.1$  Hz, 1H), 3.06 (dd,  $J = 2.5, 11.3$  Hz, 1H), 3.14-3.29 (m, 3H), 3.52 (d,  $J = 11.3$  Hz, 1H), 3.68 (d,  $J = 11.2$  Hz, 1H), 7.16-7.22 (m, 1H), 7.26-7.32 (m, 2H), 7.56-7.61 (m, 2H);  $^{13}\text{C}$  NMR (100 MHz,  $\text{CDCl}_3$ )  $\delta$  22.3, 22.4, 22.7, 23.0, 27.6, 28.8, 29.6, 29.7, 29.7, 32.5, 41.7, 49.3, 52.2, 69.5, 70.0, 100.1, 125.5, 126.8, 129.3, 143.2; IR (neat) 2955, 2867, 2095, 1471, 1394, 1365, 1262, 1179, 1115, 1095, 1039, 1020, 963, 912  $\text{cm}^{-1}$ ; HRMS calcd for  $\text{C}_{24}\text{H}_{38}\text{NO}_2$  ( $\text{M}^+ + \text{H} - \text{N}_2$ ) 372.2903, found 372.2904.

**Scheme E. Synthesis of azido ketal **1e** (Table 1)**

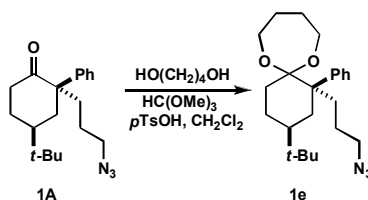

**(1R,3S)-1-(3-Azidopropyl)-3-tert-butyl-1-phenyl-7,12-dioxaspiro[5.6]dodecane (1e).** According to the procedure described for **1b**, the reaction of **1A** (0.0545 g, 0.17 mmol), 1,4-butanediol (0.15 g, 1.7 mmol, 10 equiv), trimethyl orthoformate (0.093 g, 0.85 mmol, 5.0 equiv) and *p*TsOH (3 mg, 0.1 mmol) in  $\text{CH}_2\text{Cl}_2$  (10 mL) at rt for 20 h after chromatography (1/200-1/100 EtOAc/hexanes) the title compound as oil ( $R_f = 0.58$ , 1/10 EtOAc/hexanes). Yield 49% (0.0321 g, 0.083 mmol).  $^1\text{H}$  NMR (400 MHz,  $\text{CDCl}_3$ )  $\delta$  0.96 (s, 9H), 1.03-1.14 (m, 1H), 1.18-1.42 (m, 6H), 1.58-1.66 (m, 2H), 1.72-1.81 (m, 2H), 1.98-2.13 (m, 3H), 2.32 (td,  $J = 3.2, 14.6$  Hz, 1H), 2.49-2.57 (m, 1H), 3.15-3.27 (m, 3H), 3.42-3.49 (m, 1H), 3.59-3.68 (m, 1H), 7.19-7.25 (m, 1H), 7.26-7.33 (m, 2H), 7.58-7.62 (m, 2H);  $^{13}\text{C}$  NMR (100 MHz,  $\text{CDCl}_3$ )  $\delta$  22.8, 23.9, 27.6, 29.8, 30.0, 30.6,

31.2, 31.7, 32.5, 41.4, 49.5, 52.2, 63.5, 64.3, 103.9, 126.0, 127.2, 129.5, 143.3; IR (neat) 2957, 2094, 1467, 1365, 1235, 1186, 1140, 1095, 1069, 1004, 913  $\text{cm}^{-1}$ ; HRMS calcd for  $\text{C}_{23}\text{H}_{36}\text{NO}_2$  ( $\text{M}^+ + \text{H} - \text{N}_2$ ) 358.2746, found 358.2752. Note: the reaction of **1A** with (2Z)-2-butene-1,4-diol under identical reaction conditions afforded the corresponding ketal in 80% yield.

**Scheme F. Synthesis of enol ether 1f (Table 1)**

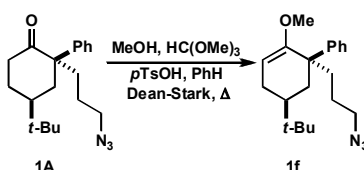

**((1R,5S)-1-(3-Azidopropyl)-5-tert-butyl-2-methoxycyclohex-2-enyl)benzene**

**(1f)**. To a solution of **1A** (0.0959 g, 0.30 mmol) in methanol (5 mL), trimethyl orthoformate (0.33 mL, 3.0 mmol, 10 equiv) was added followed by *p*TsOH (3 mg, 0.1 mmol) and the resulting mixture was heated to reflux for 3 h. Work-up as described for **1a**, followed by chromatography (1/50 EtOAc/hexanes) afforded the title compound as oil ( $R_f = 0.63$ , 1/10 EtOAc/hexanes). Yield 63% (0.0471 g, 0.14 mmol).  $^1\text{H}$  NMR (400 MHz,  $\text{CDCl}_3$ )  $\delta$  0.94 (s, 9H), 1.47 (t,  $J = 13.0$  Hz, 1H), 1.56-1.65 (m, 1H), 1.70-1.87 (m, 3H), 1.98 (ddd,  $J = 2.0, 11.2, 13.3$  Hz, 1H), 2.08-2.25 (m, 3H), 3.24-3.36 (m, 2H), 3.47 (s, 3H), 4.92 (dd,  $J = 1.9, 6.2$  Hz, 1H), 7.17-7.23 (m, 1H), 7.25-7.35 (m, 4H);  $^{13}\text{C}$  NMR (100 MHz,  $\text{CDCl}_3$ )  $\delta$  25.6, 25.6, 27.3, 32.1, 35.5, 41.0, 43.7, 47.3, 52.4, 54.0, 96.6, 125.6, 126.6, 128.2, 147.9, 158.3; IR (neat) 2959, 2095, 1661, 1600, 1495, 1466, 1365, 1208, 1168, 1040, 912  $\text{cm}^{-1}$ ; HRMS calcd for  $\text{C}_{20}\text{H}_{30}\text{NO}$  ( $\text{M}^+ + \text{H} - \text{N}_2$ ) 300.2327, found 300.2311.

**Scheme G. Synthesis of azido ketal 1g (Table 2)**

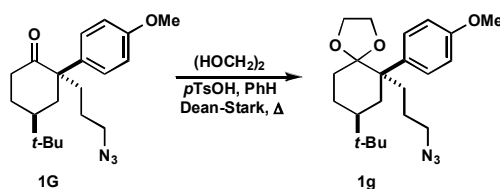

**(6R,8S)-6-(3-Azidopropyl)-8-tert-butyl-6-(4-methoxyphenyl)-1,4-dioxaspiro**

**[4.5]decane (1g)**. According to the procedure described for **1a**, the reaction of **1G** (0.105 g, 0.31 mmol), ethylene glycol (2 mL) and *p*TsOH (6 mg, 0.1 mmol) in benzene (10 mL) under Dean-Stark apparatus for 6 h afforded after chromatography (1/100-1/4 EtOAc/hexanes) the title compound as oil ( $R_f = 0.65$ , 1/4 EtOAc/hexanes). Yield 53% (0.0622 g, 0.16 mmol).  $^1\text{H}$  NMR (400 MHz,  $\text{CDCl}_3$ )  $\delta$  0.97 (s, 9H), 1.02-1.15 (m, 1H), 1.26-1.45 (m, 3H), 1.63-1.71 (m, 1H), 1.73-1.84 (m, 2H), 1.91-2.12 (m, 3H), 2.22 (td,  $J = 3.5, 13.1$  Hz, 1H), 2.69 (qd,  $J = 1.0, 7.2$  Hz, 1H), 3.16-3.28 (m, 2H), 3.51-3.56 (m, 1H), 3.58-3.64 (m, 1H), 3.74 (q,  $J = 7.4$  Hz, 1H), 3.82 (s, 3H), 6.83-6.88 (m, 2H), 7.41-7.46

(m, 2H);  $^{13}\text{C}$  NMR (100 MHz,  $\text{CDCl}_3$ )  $\delta$  22.9, 24.6, 27.7, 29.3, 31.2, 32.5, 32.8, 41.4, 48.0, 52.1, 55.1, 64.8, 65.1, 112.3, 112.7, 129.5, 134.8, 157.8; IR (neat) 2957, 2096, 1609, 1514, 1466, 1366, 1252, 1185, 1154, 1086, 1036,  $950\text{ cm}^{-1}$ ; HRMS calcd for  $\text{C}_{22}\text{H}_{34}\text{NO}_3$  ( $\text{M}^+ + \text{H} - \text{N}_2$ ) 360.2539, found 360.2544.

**Scheme H.** Synthesis of azido ketal **1h** (Table 2)

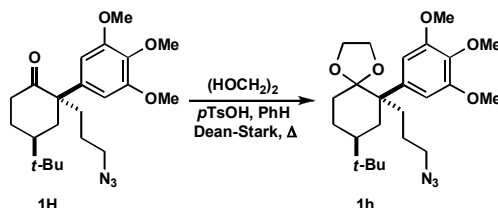

**(6R,8S)-6-(3-Azidopropyl)-8-tert-butyl-6-(3,4,5-trimethoxyphenyl)-1,4-dioxaspiro[4.5]decane (1h).** According to the procedure described for **1a**, the reaction of **1H** (0.108 g, 0.27 mmol), ethylene glycol (2 mL) and *p*TsOH (3 mg, 0.05 mmol) in benzene (10 mL) under Dean-Stark apparatus for 5 h afforded after chromatography (1/100-1/4 EtOAc/hexanes) the title compound as oil ( $R_f = 0.32$ , 1/4 EtOAc/hexanes). Yield 81% (0.0966 g, 0.22 mmol).  $^1\text{H}$  NMR (400 MHz,  $\text{CDCl}_3$ )  $\delta$  0.96 (s, 9H), 1.02-1.14 (m, 1H), 1.2801.43 (m, 3H), 1.67 (tt,  $J = 2.4, 13.7$  Hz, 1H), 1.72-1.81 (m, 2H), 1.86-1.98 (m, 2H), 2.01-2.11 (m, 1H), 2.18 (td,  $J = 3.5, 13.2$  Hz, 1H), 2.82 (qd,  $J = 0.8, 7.6$  Hz, 1H), 3.23 (t,  $J = 6.6$  Hz, 2H), 3.58-3.68 (m, 2H), 3.77 (q,  $J = 6.0$  Hz, 1H), 3.85 (s, 3H), 3.87 (s, 6H), 6.78 (s, 2H);  $^{13}\text{C}$  NMR (100 MHz,  $\text{CDCl}_3$ )  $\delta$  22.9, 24.4, 27.7, 29.8, 31.2, 32.4, 32.9, 41.5, 48.7, 52.1, 56.3, 60.9, 64.9, 65.1, 106.6, 106.7, 112.3, 138.8, 152.1; IR (neat) 2956, 1095, 1585, 1512, 1465, 1411, 1326, 1248, 1183, 1126,  $1012\text{ cm}^{-1}$ ; HRMS calcd for  $\text{C}_{24}\text{H}_{37}\text{N}_3\text{O}_5\text{Na}$  ( $\text{M}^+ + \text{Na}$ ) 470.2631, found 470.2617.

**Scheme I.** Synthesis of azido ketal **1i** (Table 2)

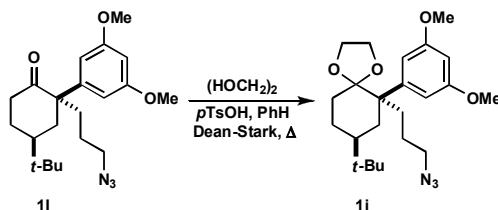

**(6R,8S)-6-(3-Azidopropyl)-8-tert-butyl-6-(3,5-dimethoxyphenyl)-1,4-dioxaspiro[4.5]decane (1i).** According to the procedure described for **1a**, the reaction of **1I** (0.0972 g, 0.26 mmol), ethylene glycol (2 mL) and *p*TsOH (5 mg, 0.1 mmol) in benzene (10 mL) under Dean-Stark apparatus for 8 h afforded after chromatography (1/100-1/4 EtOAc/hexanes) the title compound as oil ( $R_f = 0.55$ , 1/4 EtOAc/hexanes). Yield 77% (0.0833 g, 0.20 mmol).  $^1\text{H}$  NMR (400 MHz,  $\text{CDCl}_3$ )  $\delta$  0.96 (s, 9H), 1.01-1.13 (m, 1H), 1.30-1.43 (m, 3H), 1.67 (tt,  $J = 3.9, 13.8$  Hz, 1H), 1.72-1.78 (m, 1H), 1.82-1.98 (m, 3H), 2.02-2.11 (m, 1H), 2.17 (td,  $J = 3.7, 13.8$  Hz, 1H), 2.89 (qd,  $J = 0.9, 7.4$  Hz,

1H), 3.13-3.26 (m, 2H), 3.61-3.70 (m, 2H), 3.76-3.82 (m, 1H), 3.81 (s, 6H), 6.36 (t,  $J = 2.2$  Hz, 1H), 6.74 (d,  $J = 2.2$  Hz, 2H);  $^{13}\text{C}$  NMR (100 MHz,  $\text{CDCl}_3$ )  $\delta$  22.9, 24.4, 27.6, 29.9, 31.2, 32.5, 32.9, 41.4, 48.7, 52.1, 55.2, 64.9, 65.1, 97.3, 107.6, 112.4, 146.0, 159.9; IR (neat) 2956, 2095, 1595, 1455, 1421, 1289, 1205, 1156, 1081, 833  $\text{cm}^{-1}$ ; HRMS calcd for  $\text{C}_{23}\text{H}_{36}\text{NO}_4$  ( $\text{M}^+ + \text{H} - \text{N}_2$ ) 390.2644, found 390.2648.

**Scheme J.** Synthesis of azido ketal **1j** (Table 2)

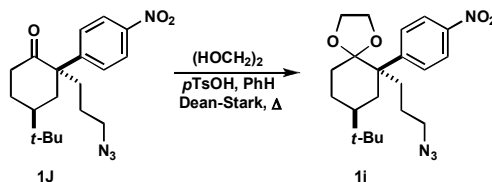

**(6R,8S)-6-(3-Azidopropyl)-8-tert-butyl-6-(4-nitrophenyl)-1,4-dioxaspiro**

**[4.5]decane (1j).** According to the procedure described for **1a**, the reaction of **1J** (0.102 g, 0.28 mmol), ethylene glycol (2 mL) and *p*TsOH (3 mg, 0.05 mmol) in benzene (10 mL) under Dean-Stark apparatus for 8 h afforded after chromatography (1/100-1/4 EtOAc/hexanes) the title compound as oil ( $R_f = 0.79$ , 1/4 EtOAc/hexanes). Yield 90% (0.101 g, 0.25 mmol).  $^1\text{H}$  NMR (400 MHz,  $\text{CDCl}_3$ )  $\delta$  0.88-1.00 (m, 1H), 0.98 (s, 9H), 1.30-1.48 (m, 3H), 1.67-1.73 (m, 1H), 1.75-1.82 (m, 1H), 1.85-1.97 (m, 2H), 2.04 (t,  $J = 12.2$  Hz, 1H), 2.16 (td,  $J = 5.1, 12.3$  Hz, 1H), 2.28 (td,  $J = 3.6, 13.2$  Hz, 1H), 2.79 (q,  $J = 7.0$  Hz, 1H), 3.18-3.29 (m, 2H), 3.50-3.56 (m, 1H), 3.61-3.67 (m, 1H), 3.79 (q,  $J = 7.1$  Hz, 1H), 7.68-7.74 (m, 2H), 8.12-8.17 (m, 2H);  $^{13}\text{C}$  NMR (100 MHz,  $\text{CDCl}_3$ )  $\delta$  22.9, 24.3, 27.6, 29.4, 31.1, 32.2, 32.5, 41.3, 49.3, 51.8, 64.6, 64.9, 112.0, 122.3, 129.6, 146.3, 151.4; IR (neat) 2960, 2871, 2096, 1604, 1517, 1471, 1348, 1264, 1183, 1149, 1085, 1034, 948, 856  $\text{cm}^{-1}$ ; HRMS calcd for  $\text{C}_{21}\text{H}_{31}\text{N}_2\text{O}_4$  ( $\text{M}^+ + \text{H} - \text{N}_2$ ) 375.2284, found 375.2267.

**Scheme K.** Synthesis of azido ketal **1k** (Table 2)

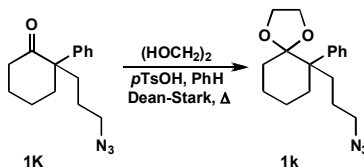

**6-(3-Azidopropyl)-6-phenyl-1,4-dioxaspiro[4.5]decane (1k).** According to the procedure described for **1a**, the reaction of **1K** (0.14 g, 0.55 mmol), ethylene glycol (2 mL) and *p*TsOH (5 mg, 0.05 mmol) in benzene (10 mL) under Dean-Stark apparatus for 8 h afforded after chromatography (1/100-1/20 EtOAc/hexanes) the title compound as oil ( $R_f = 0.49$ , 1/10 EtOAc/hexanes). Yield 76% (0.126 g, 0.42 mmol).  $^1\text{H}$  NMR (400 MHz,  $\text{CDCl}_3$ )  $\delta$  1.04-1.15 (m, 1H), 1.26-1.42 (m, 1H), 1.51-1.69 (m, 4H), 1.72-1.79 (m, 1H), 1.81-1.93 (m, 2H), 1.97-2.07 (m, 1H), 2.20 (td,  $J = 4.0, 13.0$  Hz, 1H), 2.33 (td,  $J = 3.4,$

14.3 Hz, 1H), 2.90 (q,  $J = 6.8$  Hz, 1H), 3.20 (t,  $J = 6.8$  Hz, 2H), 3.54-3.61 (m, 1H), 3.65-3.71 (m, 1H), 3.78 (q,  $J = 7.0$  Hz, 1H), 7.21 (tt,  $J = 1.1, 6.4$  Hz, 1H), 7.27-7.33 (m, 2H), 7.53-7.58 (m, 2H);  $^{13}\text{C}$  NMR (100 MHz,  $\text{CDCl}_3$ )  $\delta$  20.6, 23.2, 23.6, 29.5, 30.1, 32.4, 49.0, 52.1, 64.8, 64.9, 112.5, 125.9, 127.5, 128.8, 142.5; IR (neat) 2950, 2869, 2096, 1499, 1446, 1350, 1266, 1177, 1152, 1093, 1033, 954, 872, 761  $\text{cm}^{-1}$ ; HRMS calcd for  $\text{C}_{17}\text{H}_{24}\text{NO}_2$  ( $\text{M}^+ + \text{H} - \text{N}_2$ ) 274.1807, found 274.1795.

**Scheme L.** Synthesis of azido ketal **1m** (Table 2)

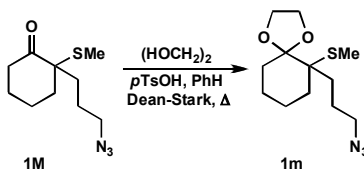

**6-(3-Azidopropyl)-6-(methylthio)-1,4-dioxaspiro[4.5]decane (1m).** According to the procedure described for **1a**, the reaction of **1M** (0.0445 g, 0.20 mmol), ethylene glycol (2 mL) and *p*TsOH (4 mg, 0.1 mmol) in benzene (10 mL) under Dean-Stark apparatus for 3 h afforded after chromatography (1/100-1/10 EtOAc/hexanes) the title compound as oil ( $R_f = 0.50$ , 1/10 EtOAc/hexanes). Yield 69% (0.0374 g, 0.14 mmol).  $^1\text{H}$  NMR (400 MHz,  $\text{CDCl}_3$ )  $\delta$  1.39-1.48 (m, 1H), 1.53-1.91 (m, 10H), 2.09 (s, 3H), 2.11-2.20 (m, 1H), 3.33 (t,  $J = 6.3$  Hz, 2H), 3.94-4.06 (m, 4H);  $^{13}\text{C}$  NMR (100 MHz,  $\text{CDCl}_3$ )  $\delta$  12.2, 21.0, 23.3, 23.5, 28.6, 31.3, 33.5, 52.2, 54.9, 65.0, 65.3, 113.6; IR (neat) 2932, 2878, 2095, 1438, 1349, 1261, 1175, 1095, 1035, 948, 913, 866  $\text{cm}^{-1}$ ; HRMS calcd for  $\text{C}_{12}\text{H}_{22}\text{NO}_2\text{S}$  ( $\text{M}^+ + \text{H} - \text{N}_2$ ) 244.1371, found 244.1366.

**Scheme M.** Synthesis of azido ketal **1o** (Table 2)

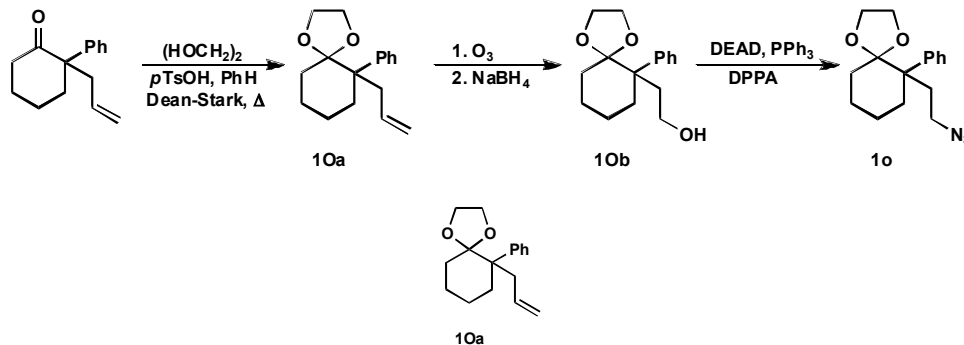

**6-Allyl-6-phenyl-1,4-dioxaspiro[4.5]decane (10a).** According to the procedure described for **1a**, the reaction of 2-allyl-2-phenylcyclohexanone (0.20 g, 0.92 mmol), ethylene glycol (2 mL) and *p*TsOH (20 mg, 0.1 mmol) in benzene (10 mL) under Dean-Stark apparatus for 5 h afforded after chromatography (1/100-1/20 EtOAc/hexanes) the title compound as oil ( $R_f = 0.57$ , 1/10 EtOAc/hexanes). Yield 91% (0.216 g, 0.84 mmol).



$^1\text{H}$  NMR (400 MHz,  $\text{CDCl}_3$ )  $\delta$  1.56-1.68 (m, 4H), 1.72-1.81 (m, 1H), 1.84-1.92 (m, 2H), 2.27-2.34 (m, 1H), 2.71 (dd,  $J = 8.8, 14.4$  Hz, 1H), 2.95 (q,  $J = 6.8$  Hz, 1H), 2.98-3.05 (m, 1H), 3.57-3.63 (m, 1H), 3.68-3.73 (m, 1H), 3.80 (q,  $J = 7.0$  Hz, 1H), 4.87-4.92 (m, 1H), 4.99-5.07 (m, 1H), 5.26-5.39 (m, 1H), 7.22 (tt,  $J = 1.2, 6.4$  Hz, 1H), 7.28-7.35 (m, 2H), 7.57-7.63 (m, 2H);  $^{13}\text{C}$  NMR (100 MHz,  $\text{CDCl}_3$ )  $\delta$  20.5, 23.6, 30.3, 32.4, 37.2, 48.9, 64.8, 64.9, 112.4, 116.7, 125.8, 127.3, 129.1, 134.9, 142.6; IR (neat) 2949, 2868, 1498, 1445, 1175, 1146, 1085, 1040, 948, 912, 873  $\text{cm}^{-1}$ ; HRMS calcd for  $\text{C}_{17}\text{H}_{26}\text{NO}_2$  ( $\text{M}^+ + \text{NH}_4$ ) 276.1964, found 276.1965.

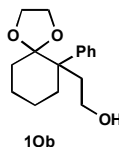

**2-(6-Phenyl-1,4-dioxaspiro[4.5]decan-6-yl)ethanol (10b).** A solution of **10a** (0.21 g, 0.81 mmol, 1.0 equiv) in  $\text{CH}_2\text{Cl}_2/\text{MeOH}$  (10 mL/20 mL) with Sudan III as indicator was ozonized at  $-78$  °C until the color changed from light pink to transparent. The reaction mixture was purged with argon and  $\text{NaBH}_4$  (0.30 g, 8.2 mmol, 10 equiv) was added in one portion. The reaction was warmed to rt and stirred for additional 2 h. The reaction was quenched with water (10 mL), extracted with  $\text{CH}_2\text{Cl}_2$  (3 x 50 mL), dried and concentrated. Chromatography (1/4-1/1 EtOAc/hexanes) afforded the title compound as oil ( $R_f = 0.48$ , 1/1 EtOAc/hexanes). Yield 85% (0.18 g, 0.69 mmol).  $^1\text{H}$  NMR (400 MHz,  $\text{CDCl}_3$ )  $\delta$  1.52-1.63 (m, 4H), 1.67-1.76 (m, 1H), 1.81-1.89 (m, 3H), 2.12-2.19 (m, 1H), 2.24-2.33 (m, 1H), 2.38-2.46 (m, 1H), 3.05 (br, 1H), 3.18-3.25 (m, 1H), 3.36-3.43 (m, 1H), 3.59-3.65 (m, 1H), 3.69-3.75 (m, 1H), 3.80 (q,  $J = 6.7$  Hz, 1H), 7.16-7.22 (m, 1H), 7.25-7.32 (m, 2H), 7.56-7.61 (m, 2H);  $^{13}\text{C}$  NMR (100 MHz,  $\text{CDCl}_3$ )  $\delta$  20.8, 23.6, 31.5, 32.1, 36.1, 48.4, 59.2, 64.6, 64.9, 112.4, 126.0, 127.6, 128.7, 142.6; IR (neat) 3368, 2948, 1445, 1177, 1147, 1092, 1032, 952, 913  $\text{cm}^{-1}$ ; HRMS calcd for  $\text{C}_{16}\text{H}_{22}\text{O}_3\text{Na}$  ( $\text{M}^+ + \text{Na}$ ) 285.1467, found 285.1459.

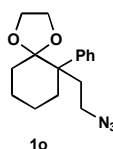

**6-(2-Azidoethyl)-6-phenyl-1,4-dioxaspiro[4.5]decane (10).** To a solution of **10b** (0.0875 g, 0.33 mmol, 1.0 equiv) in THF (10 mL) at 0 °C,  $\text{PPh}_3$  (0.263 g, 1.0 mmol, 3.0 equiv) was added, followed by diethyl azodicarboxylate (40% in toluene, 0.45 mL, 1.0 mmol, 3.0 equiv) and diphenyl phosphoryl azide (0.22 mL, 1.0 mmol, 3.0 equiv). The reaction mixture was stirred at rt for 2 h, solvent was removed under reduced pressure and the residue was purified directly by chromatography (1/100 EtOAc/hexanes, followed by 1/100-1/50 EtOAc/hexanes) to afford the title compound as oil ( $R_f = 0.42$ , 1/10 EtOAc/hexanes). Yield 96% (0.0826 g, 0.32 mmol).  $^1\text{H}$  NMR (400 MHz,  $\text{CDCl}_3$ )  $\delta$  1.54-1.66 (m, 4H), 1.71-1.77 (m, 1H), 1.79-1.88 (m, 2H), 2.17-2.25 (m, 1H), 2.29-2.38

(m, 1H), 2.42-2.51 (m, 1H), 2.83-3.03 (m, 3H), 3.61-3.67 (m, 1H), 3.71-3.76 (m, 1H), 3.82 (q,  $J = 7.0$  Hz, 1H), 7.23 (tt,  $J = 1.2, 6.4$  Hz, 1H), 7.29-7.35 (m, 2H), 7.55-7.59 (m, 2H);  $^{13}\text{C}$  NMR (100 MHz,  $\text{CDCl}_3$ )  $\delta$  20.7, 23.5, 30.7, 31.8, 32.2, 47.6, 48.4, 64.7, 64.9, 112.2, 126.3, 127.7, 128.7, 141.7; IR (neat) 2947, 2094, 1445, 1257, 1177, 1155, 1092, 1032, 956  $\text{cm}^{-1}$ ; HRMS calcd for  $\text{C}_{16}\text{H}_{22}\text{NO}_2$  ( $\text{M}^+ + \text{H} - \text{N}_2$ ) 260.1651, found 260.1661.

## Synthesis of Bridged Orthoamides

**General procedure for Schmidt Reaction.** To a solution of azidoketal **1** (1.0 equiv) in CH<sub>2</sub>Cl<sub>2</sub>, Lewis or protic acid was added dropwise at specified temperature, the reaction was allowed to slowly warm to rt and was stirred at rt for a specified time. The reaction was cooled to 0 °C, quenched with sat. NaHCO<sub>3</sub> (10 mL), diluted with brine (10 mL), extracted with CH<sub>2</sub>Cl<sub>2</sub> (4 x 20 mL), dried (Na<sub>2</sub>SO<sub>4</sub>), and concentrated. Flash chromatography afforded title  $\alpha$ -amino ketals **2**. Note: due to unfavorable N<sub>1p</sub>  $\rightarrow$   $\sigma^*$ <sub>C-O</sub> arrangement the title products can be easily purified by traditional chromatography. By contrast, although fused amino ketals were sometimes observed by analysis of crude reaction mixtures by NMR, these compounds hydrolyze on silica gel.

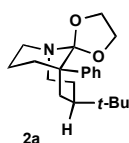

**(4R,6R)-4-tert-Butyl-6-phenyl-1-azaspiro[bicyclo[4.3.1]decane-10,2'-[1,3]dioxolane] (2a).** According to the general procedure, the reaction of **1a** (0.0144 g, 0.040 mmol, 1.0 equiv) and BF<sub>3</sub>•CH<sub>3</sub>CN (15.2% in CH<sub>3</sub>CN, 0.16 mL, 0.20 mmol, 5.0 equiv) in CH<sub>2</sub>Cl<sub>2</sub> (2.0 mL) for 2 h at 0 °C and 1 h at rt, afforded after chromatography (1/4 EtOAc/hexanes) the title compound as oil (R<sub>f</sub> = 0.35, 1/4 EtOAc/hexanes). Yield 88% (0.0116 g, 0.35 mmol). <sup>1</sup>H NMR (400 MHz, CDCl<sub>3</sub>)  $\delta$  0.89 (s, 9H), 1.48-1.56 (m, 1H), 1.68-1.86 (m, 3H), 1.89-2.01 (m, 2H), 2.09-2.21 (m, 2H), 2.55-2.66 (m, 2H), 2.68-2.76 (m, 1H), 3.39 (td, *J* = 4.5, 13.5 Hz, 1H), 3.45-3.56 (m, 2H), 3.87-3.96 (m, 2H), 4.03-4.11 (m, 1H), 7.17 (tt, *J* = 1.0, 6.6 Hz, 1H), 7.24-7.31 (m, 2H), 7.62-7.67 (m, 2H); <sup>13</sup>C NMR (100 MHz, CDCl<sub>3</sub>)  $\delta$  22.2, 27.7, 30.2, 33.8, 35.0, 43.8, 45.1, 46.2, 49.7, 51.2, 63.1, 64.6, 116.9, 125.2, 127.1, 127.4, 149.3; IR (neat) 2960, 2892, 2868, 1497, 1457, 1364, 1322, 1202, 1164, 1143, 1104, 1028, 950 cm<sup>-1</sup>; HRMS calcd for C<sub>21</sub>H<sub>32</sub>NO<sub>2</sub> (M<sup>+</sup> + H) 330.2433, found 330.2406. Note: Analysis of the crude reaction mixture by NMR indicated the presence of **2a** as an exclusive compound in the crude reaction mixture. Note: the reaction of **1a** and TfOH afforded **2a** in 58%. The reaction of **1a** and TiCl<sub>4</sub> afforded **2a** in 84%. Interestingly, when **1a** was subjected to the reaction with TFA the formation of the bridged ketal was not observed. The influence of promoters on the selectivity of the Schmidt rearrangement is well-precedented.<sup>2,3</sup> Details of the current investigation will be reported in a full disclosure of this work.

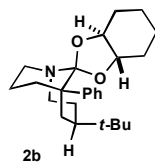

**(3aS,4'R,6'R,7aS)-4'-tert-Butyl-6'-phenylhexahydro-1'-azaspiro[benzo[d][1,3]dioxole-2,10'-bicyclo[4.3.1]decane] (2b).** According to the general procedure, the

reaction of **1b** (0.0270 g, 0.066 mmol, 1.0 equiv, 9:1 dr) and  $\text{BF}_3 \cdot \text{CH}_3\text{CN}$  (15.2% in  $\text{CH}_3\text{CN}$ , 0.27 mL, 0.33 mmol, 5.0 equiv) in  $\text{CH}_2\text{Cl}_2$  (3.0 mL) for 2 h at 0 °C and 1 h at rt, afforded after chromatography (1/100-1/10 EtOAc/hexanes) the title compound as oil ( $R_f = 0.52$ , 1/4 EtOAc/hexanes). Yield 71% (0.0179 g, 0.047 mmol, single diastereoisomer, stereochemistry not determined).  $^1\text{H}$  NMR (400 MHz,  $\text{CDCl}_3$ )  $\delta$  0.85-0.97 (m, 1H), 0.91 (s, 9H), 1.06 (tt,  $J = 3.9, 12.6$  Hz, 1H), 1.18 (tt,  $J = 3.8, 13.3$  Hz, 1H), 1.38 (qd,  $J = 3.8, 11.7$  Hz, 1H), 1.47-1.55 (m, 1H), 1.57-1.69 (m, 2H), 1.72-1.98 (m, 6H), 2.02-2.08 (m, 1H), 2.09-2.18 (m, 1H), 2.20-2.27 (m, 1H), 2.61-2.69 (m, 2H), 2.77-2.88 (m, 2H), 3.49-3.66 (m, 3H), 7.14-7.19 (m, 1H), 7.25-7.31 (m, 2H), 7.63-7.68 (m, 2H);  $^{13}\text{C}$  NMR (100 MHz,  $\text{CDCl}_3$ )  $\delta$  21.8, 23.7, 23.7, 27.7, 28.2, 29.7, 30.4, 34.1, 34.1, 42.3, 46.1, 46.1, 49.8, 51.7, 78.0, 82.1, 117.0, 125.2, 127.2, 128.1, 147.9; IR (neat) 2942, 1457, 1364, 1235, 1186, 1134, 1097  $\text{cm}^{-1}$ ; HRMS calcd for  $\text{C}_{25}\text{H}_{38}\text{NO}_2$  ( $\text{M}^+ + \text{H}$ ) 384.2903, found 384.2889.

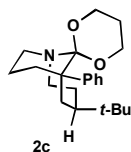

**(4R,6R)-4-tert-Butyl-6-phenyl-1-azaspiro[bicyclo[4.3.1]decane-10,2'-[1,3]dioxane] (2c).** According to the general procedure, the reaction of **1c** (0.0233 g, 0.063 mmol, 1.0 equiv) and  $\text{BF}_3 \cdot \text{CH}_3\text{CN}$  (15.2% in  $\text{CH}_3\text{CN}$ , 0.15 mL, 0.19 mmol, 3.0 equiv) in  $\text{CH}_2\text{Cl}_2$  (2.5 mL) for 5 h at -78 °C and 2 h at rt, afforded after chromatography (1/100-1/10 EtOAc/hexanes) the title compound as oil ( $R_f = 0.52$ , 1/10 EtOAc/hexanes). Yield 77% (0.0166 g, 0.048 mmol).  $^1\text{H}$  NMR (400 MHz,  $\text{CDCl}_3$ )  $\delta$  0.86 (s, 9H), 1.26-1.36 (m, 1H), 1.44-1.57 (m, 2H), 1.69-1.88 (m, 4H), 1.94-2.20 (m, 3H), 2.42-2.52 (m, 1H), 2.61-2.75 (m, 2H), 3.13 (td,  $J = 4.2, 13.7$  Hz, 1H), 3.44-3.51 (m, 1H), 3.52-3.58 (m, 1H), 3.87-3.93 (m, 1H), 4.02-4.11 (m, 1H), 4.13-4.22 (m, 1H), 7.16 (tt,  $J = 1.2, 6.8$  Hz, 1H), 7.24-7.31 (m, 2H), 7.76-7.83 (m, 2H);  $^{13}\text{C}$  NMR (100 MHz,  $\text{CDCl}_3$ )  $\delta$  22.3, 24.6, 27.8, 30.4, 33.7, 33.9, 43.3, 46.2, 46.9, 48.9, 51.2, 57.8, 60.0, 107.0, 124.8, 127.2, 127.5, 150.6; IR (neat) 2958, 2871, 1465, 1365, 1321, 1247, 1170, 1135, 1103, 1025  $\text{cm}^{-1}$ ; HRMS calcd for  $\text{C}_{22}\text{H}_{34}\text{NO}_2$  ( $\text{M}^+ + \text{H}$ ) 344.2590, found 344.2583.

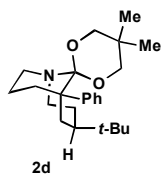

**(4R,6R)-4-tert-Butyl-5',5'-dimethyl-6-phenyl-1-azaspiro[bicyclo[4.3.1]decane-10,2'-[1,3]dioxane] (2d).** According to the general procedure, the reaction of **1d** (0.0195 g, 0.049 mmol, 1.0 equiv) and  $\text{BF}_3 \cdot \text{CH}_3\text{CN}$  (15.2% in  $\text{CH}_3\text{CN}$ , 0.12 mL, 0.15 mmol, 3.0 equiv) in  $\text{CH}_2\text{Cl}_2$  (2.5 mL) for 5 h at -78 °C and 2 h at rt, afforded after chromatography (1/100-1/10 EtOAc/hexanes) the title compound as oil ( $R_f = 0.64$ , 1/10 EtOAc/hexanes). Yield 75% (0.0136 g, 0.037 mmol).  $^1\text{H}$  NMR (400 MHz,  $\text{CDCl}_3$ )  $\delta$  0.66 (s, 3H), 0.76 (s,

3H), 0.87 (s, 9H), 1.48-1.61 (m, 2H), 1.71-1.86 (m, 3H), 1.90 (dd,  $J = 5.2, 13.2$  Hz, 1H), 1.98-2.08 (m, 1H), 2.09-2.21 (m, 1H), 2.62-2.78 (m, 3H), 2.91 (dd,  $J = 2.5, 10.3$  Hz, 1H), 3.11 (td,  $J = 4.2, 13.7$  Hz, 1H), 3.33 (dd,  $J = 2.5, 10.4$  Hz, 1H), 3.46-3.53 (m, 1H), 3.70 (d,  $J = 10.3$  Hz, 1H), 3.80 (d,  $J = 10.4$  Hz, 1H), 7.14-7.19 (m, 1H), 7.25-7.32 (m, 2H), 7.75-7.79 (m, 2H);  $^{13}\text{C}$  NMR (100 MHz,  $\text{CDCl}_3$ )  $\delta$  22.3, 22.5, 23.3, 27.8, 29.0, 30.4, 33.2, 33.8, 42.6, 46.2, 46.6, 48.9, 51.2, 68.1, 70.7, 106.6, 125.0, 127.0, 128.0, 149.3; IR (neat) 2955, 2867, 1462, 1395, 1365, 1323, 1264, 1159, 1141, 1104, 1076, 1025, 907  $\text{cm}^{-1}$ ; HRMS calcd for  $\text{C}_{24}\text{H}_{38}\text{NO}_2$  ( $\text{M}^+ + \text{H}$ ) 372.2903, found 372.2894.

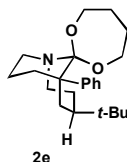

**((4R,6R)-4-*tert*-Butyl-6-phenyl-1-azaspiro[bicyclo[4.3.1]decane-10,2'-[1,3]dioxepane] (2e).** According to the general procedure, **1e** (0.0165 g, 0.043 mmol, 1.0 equiv) was reacted with  $\text{BF}_3 \cdot \text{CH}_3\text{CN}$  (15.2% in  $\text{CH}_3\text{CN}$ , 0.11 mL, 0.13 mmol, 3.0 equiv) in  $\text{CH}_2\text{Cl}_2$  (2.5 mL) for 5 h at  $-78$  °C and 1 h at rt. After the usual work-up the reaction was analyzed by NMR. Yield 70% (vs. nitromethane as the internal standard). Note: the compound is unstable on silica gel.  $^1\text{H}$  NMR (400 MHz,  $\text{CDCl}_3$ )  $\delta$  0.89 (s, 9H), 1.37-1.91 (m, 10H), 2.05-2.21 (m, 2H), 2.62-2.76 (m, 3H), 2.93-2.99 (m, 1H), 3.31 (td,  $J = 4.5, 13.5$  Hz, 1H), 3.47 (ddd,  $J = 3.1, 4.8, 12.0$  Hz, 1H), 3.51-3.58 (m, 1H), 3.67-3.75 (m, 1H), 3.96-4.03 (m, 1H), 7.17 (tt,  $J = 1.1, 6.5$  Hz, 1H), 7.23-7.31 (m, 2H), 7.73-7.78 (m, 2H);  $^{13}\text{C}$  NMR (100 MHz,  $\text{CDCl}_3$ )  $\delta$  22.2, 27.8, 28.8, 28.8, 30.1, 33.9, 34.4, 42.6, 46.1, 47.4, 49.5, 51.4, 61.9, 63.0, 109.6, 125.2, 127.0, 128.5, 148.8; IR (neat) 2940, 1554, 1456, 1365, 1216, 1187, 1131, 1104, 1059, 1025, 913  $\text{cm}^{-1}$ ; HRMS calcd for  $\text{C}_{23}\text{H}_{36}\text{NO}_2$  ( $\text{M}^+ + \text{H}$ ) 358.2746, found 358.2743. Chromatography of the above reaction mixture (1/5/95-1/10/90  $\text{NH}_4\text{OH}/\text{MeOH}/\text{CH}_2\text{Cl}_2$ ) afforded the corresponding 9-membered amino ester **2ee** as oil ( $R_f = 0.21$ , 1/10/90  $\text{NH}_4\text{OH}/\text{MeOH}/\text{CH}_2\text{Cl}_2$ ) in 69% overall yield (0.0111 g, 0.030 mmol). As expected 1,3-dioxepane is more labile than 1,3-dioxolane or 1,3-dioxane derived ketals.<sup>7</sup> It is possible that in the case of bridged  $\alpha$ -amino ketals the hydrolysis is facilitated by electron donation from the bridgehead nitrogen.

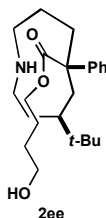

**(5R,7R)-4-Hydroxybutyl 7-*tert*-butyl-5-phenylazonane-5-carboxylate (2ee).** Oil.  $^1\text{H}$  NMR (400 MHz,  $\text{CDCl}_3$ )  $\delta$  0.41 (s, 9H), 1.26-1.34 (m, 1H), 1.37-1.43 (m, 1H), 1.44-1.51 (m, 2H), 1.54-1.69 (m, 5H), 1.74-2.02 (m, 3H), 2.13-2.24 (m, 2H), 2.67-2.90 (m, 5H), 3.56 (t,  $J = 6.4$  Hz, 2H), 4.06-4.17 (m, 2H), 7.17-7.24 (m, 1H), 7.26-7.32 (m,

4H);  $^{13}\text{C}$  NMR (100 MHz,  $\text{CDCl}_3$ )  $\delta$  22.1, 24.9, 25.3, 27.3, 29.2, 33.1, 34.0, 35.3, 37.7, 43.3, 46.5, 55.2, 62.2, 64.5, 126.6, 127.0, 128.2, 144.9, 177.1; IR (neat) 3369, 2948, 1722, 1555, 1446, 1366, 1216, 1186, 1048, 913  $\text{cm}^{-1}$ ; HRMS calcd for  $\text{C}_{23}\text{H}_{38}\text{NO}_3$  ( $\text{M}^+ + \text{H}$ ) 376.2852, found 376.2831. Note: although all of the  $\alpha$ -amino ketals are easily observed by thin layer chromatography methods (a result of unfavorable  $\text{N}_{\text{lp}} \rightarrow \sigma^*_{\text{C-O}}$  overlap), **2e** could not be monitored by TLC, which is further consistent with its rapid hydrolysis. Interestingly, the reaction of the analogous azido ketal derived from (2*Z*)-2-butene-1,4-diol under identical reaction conditions afforded the corresponding  $\alpha$ -amino ketal in 47% yield (NMR analysis). As expected, the allylic bond additionally facilitates the hydrolysis of this orthoamide.

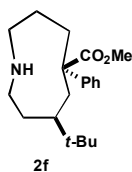

**(7*R*)-Methyl 7-*tert*-butyl-5-phenylazonane-5-carboxylate (2f).** According to the general procedure, the reaction of **1f** (0.0226 g, 0.069 mmol, 1.0 equiv) and TfOH (0.030 mL, 0.35 mmol, 1.0 equiv) in  $\text{CH}_2\text{Cl}_2$  (2.5 mL) for 0.5 h at 0 °C, afforded after chromatography (1/5/85-1/10/90  $\text{NH}_4\text{OH}/\text{MeOH}/\text{CH}_2\text{Cl}_2$ ) the title product as oil ( $R_f = 0.32$ , 1/10/90  $\text{NH}_4\text{OH}/\text{MeOH}/\text{CH}_2\text{Cl}_2$ ). Yield 64% (0.0140 g, 0.044 mmol).  $^1\text{H}$  NMR (400 MHz,  $\text{CDCl}_3$ )  $\delta$  0.41 (s, 9H), 1.23-1.37 (m, 1H), 1.39-1.46 (m, 1H), 1.51-1.71 (m, 2H), 1.77-1.93 (m, 2H), 2.14-2.25 (m, 2H), 2.58-2.70 (m, 1H), 2.73-2.82 (m, 2H), 2.82-2.96 (m, 3H), 3.67 (s, 3H), 7.18-7.36 (m, 5H);  $^{13}\text{C}$  NMR (100 MHz,  $\text{CDCl}_3$ )  $\delta$  21.7, 25.4, 27.3, 32.8, 34.0, 35.3, 37.7, 43.1, 46.3, 52.1, 55.2, 126.8, 126.9, 128.3, 144.8, 177.6; IR (neat) 2949, 2870, 1728, 1479, 1446, 1366, 1244, 1200, 1186, 1078, 910  $\text{cm}^{-1}$ ; HRMS calcd for  $\text{C}_{20}\text{H}_{32}\text{NO}_2$  ( $\text{M}^+ + \text{H}$ ) 318.2433, found 318.2424. Note: in contrast to the Schmidt reaction of **2e**, the analysis of crude reaction mixture by NMR indicated the presence of the same species as after chromatographic purification. Attempted trapping of the oxonium ion generated from **1f** with external nucleophiles has not been successful so far.

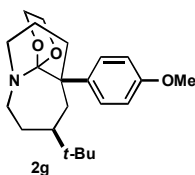

**(4*R*,6*R*)-4-*tert*-Butyl-6-(4-methoxyphenyl)-1-azaspiro[bicyclo[4.3.1]decane-10,2'-[1,3]dioxolane] (2g).** According to the general procedure, the reaction of **1g** (0.0201 g, 0.052 mmol, 1.0 equiv) and  $\text{BF}_3 \cdot \text{CH}_3\text{CN}$  (15.2% in  $\text{CH}_3\text{CN}$ , 0.21 mL, 0.26 mmol, 5.0 equiv) in  $\text{CH}_2\text{Cl}_2$  (2.5 mL) for 2 h at 0 °C and 1 h at rt, afforded after chromatography (1/1 EtOAc/hexanes-EtOAc) the title compound as oil ( $R_f = 0.37$ , 1/1 EtOAc/hexanes). Yield 92% (0.0171 g, 0.48 mmol).  $^1\text{H}$  NMR (400 MHz,  $\text{CDCl}_3$ )  $\delta$  0.89

(s, 9H), 1.47-1.55 (m, 1H), 1.64-1.85 (m, 3H), 1.87-1.99 (m, 2H), 2.06-2.20 (m, 2H), 2.54-2.66 (m, 2H), 2.68-2.75 (m, 1H), 3.39 (td,  $J = 4.1, 13.2$  Hz, 1H), 3.44-3.56 (m, 2H), 3.81 (s, 3H), 3.86-3.94 (m, 2H), 4.03-4.10 (m, 1H), 6.80-6.85 (m, 2H), 7.53-7.59 (m, 2H);  $^{13}\text{C}$  NMR (100 MHz,  $\text{CDCl}_3$ )  $\delta$  22.2, 27.7, 30.1, 33.8, 35.2, 43.9, 44.6, 46.2, 49.8, 51.3, 55.1, 63.1, 64.7, 112.6, 117.0, 128.1, 141.5, 157.0; IR (neat) 2958, 1610, 1512, 1464, 1365, 1323, 1253, 1189, 1105, 1038, 950, 914, 825  $\text{cm}^{-1}$ ; HRMS calcd for  $\text{C}_{22}\text{H}_{34}\text{NO}_3$  ( $\text{M}^+ + \text{H}$ ) 360.2539, found 360.2538. Note: Analysis of the crude reaction mixture by NMR indicated the presence of **2g** as an exclusive compound in the crude reaction mixture.

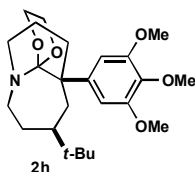

**(4R,6R)-4-tert-Butyl-6-(3,4,5-trimethoxyphenyl)-1-azaspiro[bicyclo[4.3.1]decane-10,2'-[1,3]dioxolane] (2h).** According to the general procedure, the reaction of **1h** (0.0212 g, 0.047 mmol, 1.0 equiv) and  $\text{BF}_3 \cdot \text{CH}_3\text{CN}$  (15.2% in  $\text{CH}_3\text{CN}$ , 0.19 mL, 0.24 mmol, 5.0 equiv) in  $\text{CH}_2\text{Cl}_2$  (2.5 mL) for 2 h at 0 °C and 1 h at rt, afforded after chromatography (EtOAc) the title compound as oil ( $R_f = 0.38$ , EtOAc). Yield 86% (0.0169 g, 0.040 mmol).  $^1\text{H}$  NMR (400 MHz,  $\text{CDCl}_3$ )  $\delta$  0.89 (s, 9H), 1.46-1.57 (m, 1H), 1.66-1.98 (m, 5H), 2.06-2.20 (m, 2H), 2.48-2.63 (m, 2H), 2.66-2.73 (m, 1H), 3.35 (td,  $J = 3.7, 13.6$  Hz, 1H), 3.52 (dd,  $J = 3.9, 14.0$  Hz, 1H), 3.59-3.66 (m, 1H), 3.86 (s, 3H), 3.88 (s, 6H), 3.92-4.01 (m, 2H), 4.08-4.17 (m, 1H), 6.97 (s, 2H);  $^{13}\text{C}$  NMR (100 MHz,  $\text{CDCl}_3$ )  $\delta$  22.3, 27.7, 30.1, 33.8, 35.3, 44.2, 45.2, 46.2, 49.5, 51.2, 56.1, 60.7, 63.1, 64.6, 105.1, 117.1, 135.9, 145.4, 151.9; IR (neat) 2957, 1584, 1513, 1463, 1411, 1364, 1318, 1246, 1165, 1128, 1105, 1015, 950, 913  $\text{cm}^{-1}$ ; HRMS calcd for  $\text{C}_{24}\text{H}_{38}\text{NO}_5$  ( $\text{M}^+ + \text{H}$ ) 420.2750, found 420.2755. Note: Analysis of the crude reaction mixture by NMR indicated the presence of **2h** as an exclusive compound in the crude reaction mixture.

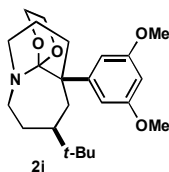

**(4R,6R)-4-tert-Butyl-6-(3,5-dimethoxyphenyl)-1-azaspiro[bicyclo[4.3.1]decane-10,2'-[1,3]dioxolane] (2i).** According to the general procedure, the reaction of **1i** (0.0270 g, 0.065 mmol, 1.0 equiv) and  $\text{BF}_3 \cdot \text{CH}_3\text{CN}$  (15.2% in  $\text{CH}_3\text{CN}$ , 0.26 mL, 0.32 mmol, 5.0 equiv) in  $\text{CH}_2\text{Cl}_2$  (2.5 mL) for 2 h at 0 °C and 1 h at rt, afforded after chromatography (1/4-1/1 EtOAc/hexanes) the title compound as oil ( $R_f = 0.53$ , EtOAc). Yield 86% (0.0216 g, 0.056 mmol).  $^1\text{H}$  NMR (400 MHz,  $\text{CDCl}_3$ )  $\delta$  0.88 (s, 9H), 1.47-1.54 (m, 1H), 1.64-1.82 (m, 3H), 1.86-1.99 (m, 2H), 2.05-2.18 (m, 2H), 2.48-2.62 (m, 2H), 2.69 (dd,  $J = 3.9, 12.6$  Hz, 1H), 3.35 (td,  $J = 4.0, 13.8$  Hz, 1H), 3.51 (ddd,  $J = 2.1,$

5.6, 13.6 Hz, 1H), 3.61 (q,  $J = 6.4$  Hz, 1H), 3.80 (s, 6H), 3.90-4.02 (m, 2H), 4.09 (q,  $J = 6.8$  Hz, 1H), 6.32 (t,  $J = 2.2$  Hz, 1H), 6.86 (d,  $J = 2.2$  Hz, 2H);  $^{13}\text{C}$  NMR (100 MHz,  $\text{CDCl}_3$ )  $\delta$  22.3, 27.7, 30.2, 33.8, 35.2, 44.0, 45.3, 46.2, 49.6, 51.2, 55.2, 63.1, 64.6, 96.9, 106.1, 116.9, 152.2, 159.8; IR (neat) 2957, 1595, 1456, 1421, 1324, 1203, 1150, 1103, 1028, 913, 842  $\text{cm}^{-1}$ ; HRMS calcd for  $\text{C}_{23}\text{H}_{36}\text{NO}_4$  ( $\text{M}^+ + \text{H}$ ) 390.2644, found 390.2635. Analysis of the crude reaction mixture by NMR indicated the presence of **2i** as an exclusive compound in the crude reaction mixture.

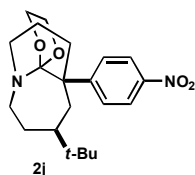

**(4R,6R)-4-tert-Butyl-6-(4-nitrophenyl)-1-azaspiro[bicyclo[4.3.1]decane-10,2'-[1,3]dioxolane] (2j).** According to the general procedure, the reaction of **1j** (0.0242 g, 0.060 mmol, 1.0 equiv) and  $\text{BF}_3 \cdot \text{CH}_3\text{CN}$  (15.2% in  $\text{CH}_3\text{CN}$ , 0.25 mL, 0.30 mmol, 5.0 equiv) in  $\text{CH}_2\text{Cl}_2$  (2.5 mL) for 2 h at 0 °C and 1 h at rt, afforded after chromatography (1/4-1/1 EtOAc/hexanes) the title compound as foam ( $R_f = 0.73$ , 1/1 EtOAc/hexanes). Yield 94% (0.0210 g, 0.056 mmol).  $^1\text{H}$  NMR (400 MHz,  $\text{CDCl}_3$ )  $\delta$  0.89 (s, 9H), 1.52-1.59 (m, 1H), 1.66 (d,  $J = 13.0$  Hz, 1H), 1.74-2.01 (m, 4H), 2.08-2.21 (m, 2H), 2.54-2.67 (m, 2H), 2.73 (dd,  $J = 4.7, 15.4$  Hz, 1H), 3.36 (td,  $J = 3.8, 13.9$  Hz, 1H), 3.47-3.55 (m, 2H), 3.87-3.97 (m, 2H), 4.06-4.17 (m, 1H), 7.78-7.84 (m, 2H), 8.08-8.14 (m, 2H);  $^{13}\text{C}$  NMR (100 MHz,  $\text{CDCl}_3$ )  $\delta$  22.0, 27.7, 30.1, 33.8, 35.1, 43.7, 45.7, 46.3, 49.5, 51.1, 62.9, 64.6, 116.4, 122.5, 128.1, 145.6, 157.1; IR (neat) 2961, 1593, 1617, 1469, 1344, 1263, 1144, 1163, 1107, 1028, 949, 912, 854, 822  $\text{cm}^{-1}$ ; HRMS calcd for  $\text{C}_{21}\text{H}_{31}\text{N}_2\text{O}_4$  ( $\text{M}^+ + \text{H}$ ) 375.2284, found 375.2274. Analysis of the crude reaction mixture by NMR indicated the presence of **2j** as an exclusive compound in the crude reaction mixture.

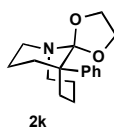

**6-Phenyl-1-azaspiro[bicyclo[4.3.1]decane-10,2'-[1,3]dioxolane] (2k).** According to the general procedure, the reaction of **1k** (0.0185 g, 0.061 mmol, 1.0 equiv) and  $\text{BF}_3 \cdot \text{CH}_3\text{CN}$  (15.2% in  $\text{CH}_3\text{CN}$ , 0.15 mL, 0.18 mmol, 3.0 equiv) in  $\text{CH}_2\text{Cl}_2$  (3.0 mL) for 4 h at -78 °C and 2 h at rt, afforded after chromatography (1/1 EtOAc/hexanes-EtOAc) the title compound as oil ( $R_f = 0.46$ , 1/1 EtOAc/hexanes). Yield 59% (0.0098 g, 0.036 mmol).  $^1\text{H}$  NMR (400 MHz,  $\text{CDCl}_3$ )  $\delta$  1.52-1.65 (m, 2H), 1.78-1.97 (m, 4H), 2.00-2.17 (m, 1H), 2.27-2.39 (m, 2H), 2.73 (td,  $J = 4.5, 13.0$  Hz, 2H), 2.86 (dd,  $J = 5.3, 14.3$  Hz, 1H), 3.15 (q,  $J = 7.0$  Hz, 1H), 3.26-3.34 (m, 1H), 3.41 (td,  $J = 3.9, 13.9$  Hz, 1H), 3.61 (q,  $J = 7.0$  Hz, 1H), 3.75 (q,  $J = 7.0$  Hz, 1H), 3.95 (q,  $J = 7.1$  Hz, 1H), 7.12-7.18 (m, 1H), 7.23-7.29 (m, 2H), 7.53-7.57 (m, 2H);  $^{13}\text{C}$  NMR (100 MHz,  $\text{CDCl}_3$ )  $\delta$  22.5, 27.1, 32.8, 35.3, 40.6, 48.0, 49.0, 50.7, 62.5, 65.2, 116.7, 125.1, 126.9, 128.1, 149.5; IR (neat) 2919,



1496, 1450, 1359, 1265, 1201, 1157, 1105, 1024, 960, 913, 848  $\text{cm}^{-1}$ ; HRMS calcd for  $\text{C}_{17}\text{H}_{24}\text{NO}_2$  ( $\text{M}^+ + \text{H}$ ) 274.1807, found 274.1805.

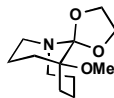

2l

**6-Methoxy-1-azaspiro[bicyclo[4.3.1]decane-10,2'-[1,3]dioxolane] (2l).**

According to the general procedure, the reaction of **1l** (0.0192 g, 0.075 mmol, 1.0 equiv) and TMSOTf (0.040 mL, 0.23 mmol, 3.0 equiv) in  $\text{CH}_2\text{Cl}_2$  (3.0 mL) for 20 min at 0 °C and 20 min at rt, afforded after chromatography (1/1 EtOAc/hexanes-EtOAc) the title compound as oil ( $R_f = 0.30$ , EtOAc). Yield 52% (0.0088 g, 0.039 mmol).  $^1\text{H}$  NMR (400 MHz,  $\text{CDCl}_3$ )  $\delta$  1.51-1.93 (m, 7H), 1.95-2.09 (m, 2H), 2.13-2.20 (m, 1H), 2.62-2.71 (m, 2H), 3.18-3.33 (m, 2H), 3.36 (s, 3H), 3.99-4.08 (m, 4H);  $^{13}\text{C}$  NMR (100 MHz,  $\text{CDCl}_3$ )  $\delta$  24.3, 24.5, 30.4, 35.5, 36.4, 48.6, 50.5, 50.6, 62.4, 62.5, 77.4, 116.1; IR (neat) 2919, 1451, 1166, 1093, 1063, 1026, 913, 873  $\text{cm}^{-1}$ ; HRMS calcd for  $\text{C}_{12}\text{H}_{22}\text{NO}_3$  ( $\text{M}^+ + \text{H}$ ) 228.1600, found 228.1601.

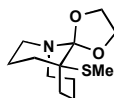

2m

**6-(Methylthio)-1-azaspiro[bicyclo[4.3.1]decane-10,2'-[1,3]dioxolane] (2m).**

According to the general procedure, the reaction of **1m** (0.0185 g, 0.068 mmol, 1.0 equiv) and  $\text{BF}_3 \cdot \text{CH}_3\text{CN}$  (15.2% in  $\text{CH}_3\text{CN}$ , 0.28 mL, 0.34 mmol, 5.0 equiv) in  $\text{CH}_2\text{Cl}_2$  (2.5 mL) for 2 h at 0 °C and 1 h at rt, afforded after chromatography (1/1 EtOAc/hexanes-EtOAc) the title compound as oil ( $R_f = 0.36$ , 1/1 EtOAc/hexanes). Yield 50% (0.0082 g, 0.034 mmol).  $^1\text{H}$  NMR (400 MHz,  $\text{CDCl}_3$ )  $\delta$  1.41-1.48 (m, 1H), 1.58-2.04 (m, 7H), 2.14-2.23 (m, 1H), 2.16 (s, 3H), 2.30 (td,  $J = 4.6, 12.8$  Hz, 1H), 2.61-2.68 (m, 1H), 2.73 (dd,  $J = 5.2, 14.2$  Hz, 1H), 3.17-3.25 (m, 1H), 3.38 (td,  $J = 3.9, 13.8$  Hz, 1H), 3.94-4.12 (m, 4H);  $^{13}\text{C}$  NMR (100 MHz,  $\text{CDCl}_3$ )  $\delta$  13.3, 23.4, 26.1, 30.6, 37.5, 38.5, 49.1, 50.5, 52.7, 62.7, 65.3, 117.0; IR (neat) 2920, 1448, 1313, 1272, 1302, 1180, 1163, 1106, 1025, 950, 908, 890, 799, 774  $\text{cm}^{-1}$ ; HRMS calcd for  $\text{C}_{12}\text{H}_{22}\text{NO}_2\text{S}$  ( $\text{M}^+ + \text{H}$ ) 244.1371, found 244.1373.

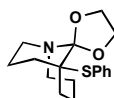

2n

**6-(Phenylthio)-1-azaspiro[bicyclo[4.3.1]decane-10,2'-[1,3]dioxolane] (2n).**

According to the general procedure, the reaction of **1n** (0.0274 g, 0.082 mmol, 1.0 equiv) and TMSOTf (0.045 mL, 0.25 mmol, 3.0 equiv) in  $\text{CH}_2\text{Cl}_2$  (2.5 mL) for 20 min at 0 °C and 40 min at rt, afforded after chromatography (1/4-1/1 EtOAc/hexanes) the title compound as yellowish solid ( $R_f = 0.66$ , EtOAc,  $\text{Mp} = 78\text{-}80$  °C). Yield 78% (0.0194 g,

0.064 mmol). Recrystallization from EtOAc/CH<sub>2</sub>Cl<sub>2</sub> afforded crystals suitable for X-ray analysis. <sup>1</sup>H NMR (500 MHz, CDCl<sub>3</sub>) δ 1.29-1.36 (m, 1H), 1.52-1.64 (m, 3H), 1.68-1.78 (m, 2H), 1.79-1.89 (m, 2H), 2.10-2.17 (m, 1H), 2.34 (tdd, *J* = 1.1, 5.2, 13.5 Hz, 1H), 2.49-2.56 (m, 1H), 2.60 (dd, *J* = 5.2, 14.1 Hz, 1H), 3.13-3.20 (m, 1H), 3.30 (td, *J* = 4.0, 13.8 Hz, 1H), 3.91-3.96 (m, 2H), 3.99-4.03 (m, 1H), 4.07 (q, *J* = 7.0 Hz, 1H), 7.20-7.27 (m, 3H), 7.49-7.52 (m, 2H); <sup>13</sup>C NMR (125 MHz, CDCl<sub>3</sub>) δ 23.7, 25.8, 30.0, 38.7, 39.6, 49.3, 50.4, 57.6, 62.8, 65.5, 116.1, 128.2, 128.3, 133.2, 137.6; IR (neat) 2920, 2859, 1581, 1471, 1449, 1358, 1314, 1272, 1216, 1163, 1182, 1107, 1024, 952, 912, 887, 816, 799 cm<sup>-1</sup>; HRMS calcd for C<sub>17</sub>H<sub>24</sub>NO<sub>2</sub>S (M<sup>+</sup> + H) 306.1528, found 306.1519. Note: the azide **1n** is known.<sup>4</sup> There is an error in reference 4; the single isomer obtained in the original report was incorrectly assigned as fused **16a** (in ref. 4). We now reassign this product as bridged **2n** based on 2D NMR experiments. In addition, we have been able to obtain x-ray of **2n**, thus unambiguously determining that **2n** contains a bridged structure.

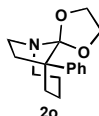

**6-Phenyl-1-azaspiro[bicyclo[4.2.1]nonane-9,2'-[1,3]dioxolane] (2o).** According to the general procedure, the reaction of **1o** (0.0208 g, 0.072 mmol, 1.0 equiv) and BF<sub>3</sub>•CH<sub>3</sub>CN (15.2% in CH<sub>3</sub>CN, 0.18 mL, 0.22 mmol, 3.0 equiv) in CH<sub>2</sub>Cl<sub>2</sub> (3.0 mL) for 4 h at -78 °C and 2 h at rt, afforded after chromatography (EtOAc-1/4 MeOH/EtOAc) the title compound as oil (R<sub>f</sub> = 0.28, 1/4 MeOH/EtOAc). Yield 92% (0.0170 g, 0.066 mmol). <sup>1</sup>H NMR (400 MHz, CDCl<sub>3</sub>) δ 1.55-1.68 (m, 2H), 1.71-1.82 (m, 2H), 1.91-2.05 (m, 2H), 2.11-2.18 (m, 1H), 2.54-2.69 (m, 2H), 2.96-3.04 (m, 1H), 3.18 (dd, *J* = 7.3, 14.7 Hz, 1H), 3.45 (td, *J* = 3.4, 11.2 Hz, 1H), 3.70 (q, *J* = 6.7 Hz, 1H), 3.99 (qd, *J* = 1.2, 7.5 Hz, 1H), 4.12 (td, *J* = 2.1, 6.7 Hz, 2H), 7.19 (tt, *J* = 1.2, 6.6 Hz, 1H), 7.25-7.32 (m, 2H), 7.41-7.46 (m, 2H); <sup>13</sup>C NMR (100 MHz, CDCl<sub>3</sub>) δ 23.5, 29.0, 31.7, 42.3, 50.2, 50.5, 52.7, 62.5, 66.0, 123.3, 125.6, 126.4, 127.8, 146.6; IR (neat) 2929, 1602, 1554, 1493, 1445, 1314, 1246, 1194, 1163, 1070, 1044, 1032, 952, 851 cm<sup>-1</sup>; HRMS calcd for C<sub>16</sub>H<sub>22</sub>NO<sub>2</sub> (M<sup>+</sup> + H) 260.1651, found 260.1652. Analysis of the crude reaction mixture by NMR indicated the presence of **2o** as an exclusive compound in the crude reaction mixture. Note: we determined that the corresponding ketone also affords the bridged product as a single regioisomer, most likely due to strain involving a four-membered transition state. Details will be disclosed in a full account of this work.

Transformations of Bridged  $\alpha$ -Amino KetalsScheme N. Reactions of bridged  $\alpha$ -amino ketals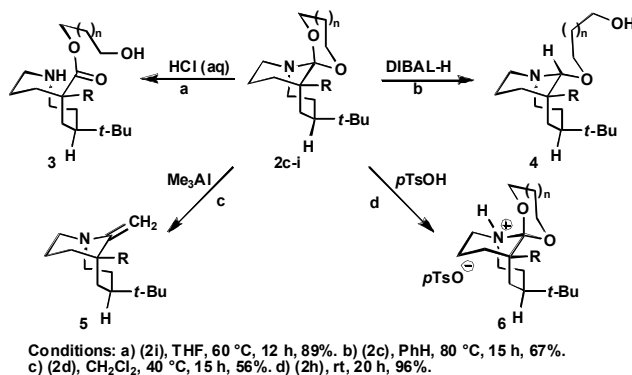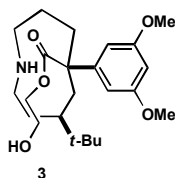

**(5R,7R)-2-Hydroxyethyl 7-tert-butyl-5-(3,5-dimethoxyphenyl)azonane-5-carboxylate (3).** To a solution of **2i** (0.0206 g, 0.053 mmol) in THF (2.0 mL), 5% HCl<sub>(aq)</sub> (2.0 mL) was added and the resulting mixture was stirred at 60 °C for 12 h. The reaction was concentrated under reduced pressure, the residue was taken in Et<sub>2</sub>O (10 mL), sat. NaHCO<sub>3</sub> (10 mL) was added, the aqueous layer was extracted with Et<sub>2</sub>O (3 x 30 mL) and CH<sub>2</sub>Cl<sub>2</sub> (3 x 30 mL). Combined organic layers were dried and concentrated. Chromatography (1/10/90-1/20/80 NH<sub>4</sub>OH/MeOH/CH<sub>2</sub>Cl<sub>2</sub>) afforded the title compound as oil (R<sub>f</sub> = 0.13, 1/10/90 NH<sub>4</sub>OH/MeOH/CH<sub>2</sub>Cl<sub>2</sub>). Yield 89% (0.0192 g, 0.047 mmol). <sup>1</sup>H NMR (400 MHz, CDCl<sub>3</sub>)  $\delta$  0.50 (s, 9H), 1.21-1.34 (m, 2H), 1.36-1.45 (m, 1H), 1.48-1.56 (m, 1H), 1.59-1.72 (m, 1H), 1.77-1.88 (m, 1H), 1.90-2.06 (m, 2H), 2.13 (dd, *J* = 4.6, 16.0 Hz, 1H), 2.27-2.35 (m, 1H), 2.58-2.66 (m, 1H), 2.93-3.16 (m, 3H), 3.75 (t, *J* = 4.8 Hz, 2H), 3.79 (s, 6H), 4.19-4.31 (m, 2H), 4.42 (br, 1H), 6.33 (t, *J* = 2.0 Hz, 1H), 6.48 (d, *J* = 2.0 Hz, 2H); <sup>13</sup>C NMR (100 MHz, CDCl<sub>3</sub>)  $\delta$  20.2, 25.8, 27.1, 30.6, 34.1, 34.7, 37.9, 42.1, 45.5, 55.2, 55.5, 61.5, 66.5, 98.9, 105.4, 146.4, 160.9, 176.8; IR (neat) 3392, 2953, 1723, 1596, 1457, 1426, 1205, 1155, 1066, 914 cm<sup>-1</sup>; HRMS calcd for C<sub>23</sub>H<sub>38</sub>NO<sub>5</sub> (M<sup>+</sup> + H) 408.2750, found 408.2764.

Note: the open-form 9-membered ring amino esters can be readily converted into the bridged lactams by treatment with base according to procedure described earlier.<sup>11</sup> The following examples illustrate the utility of bridged orthoamides in the synthesis of twisted lactams. To streamline the synthesis, the isolation of the amino esters is not necessary as exemplified by preparation of **8**.

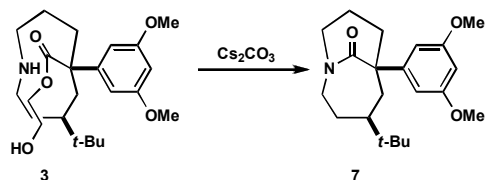

**(4R,6R)-4-tert-Butyl-6-(3,5-dimethoxyphenyl)-1-azabicyclo[4.3.1]decan-10-one (7).** To a solution of **3** (0.0152 g, 0.0375 mmol) in CH<sub>3</sub>CN (6 mL), Cs<sub>2</sub>CO<sub>3</sub> (0.061 g, 0.19 mmol, 5.0 equiv) was added and the resulting mixture was stirred at 80 °C for 1 h. The reaction was cooled to rt, solvent was removed under reduced pressure and the residue was purified directly by chromatography (1/1 EtOAc/hexanes) to afford the title compound as oil (R<sub>f</sub> = 0.82, EtOAc). Yield 86% (0.0111 g, 0.032 mmol). Spectroscopic properties matched those previously described.<sup>6</sup>

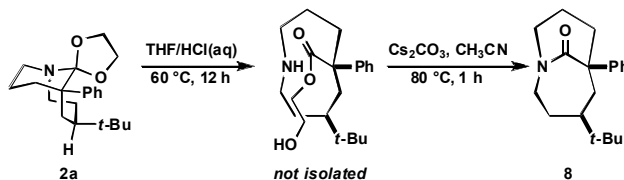

**(4R,6R)-4-tert-Butyl-6-phenyl-1-azabicyclo[4.3.1]decan-10-one (8).** To a solution of **2a** (0.0116 g, 0.035 mmol) in THF (2.0 mL), 5% HCl<sub>(aq)</sub> (2.0 mL) was added and the resulting mixture was stirred at 60 °C for 12 h. The reaction was concentrated under reduced pressure, the residue was taken in Et<sub>2</sub>O (10 mL), sat. NaHCO<sub>3</sub> (10 mL) was added, the aqueous layer was extracted with Et<sub>2</sub>O (4 x 30 mL), dried and concentrated. The resulting residue was taken in CH<sub>3</sub>CN (6 mL), Cs<sub>2</sub>CO<sub>3</sub> (0.057 g, 0.18 mmol, 5.0 equiv) was added and the resulting mixture was stirred at 80 °C for 1 h. The reaction was cooled to rt, solvent was removed under reduced pressure and the residue was purified directly by chromatography (1/10-1.4 EtOAc/hexanes) to afford the title compound as oil (R<sub>f</sub> = 0.25, EtOAc/hexanes). Yield 72% (0.0072 g, 0.025 mmol). Spectroscopic properties matched those previously described.<sup>1</sup>

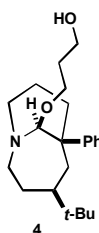

**3-((4R,6R)-4-*tert*-Butyl-6-phenyl-1-azabicyclo[4.3.1]decan-10-yloxy)propan-1-ol (4).** To a solution of **2c** (0.0200 g, 0.058 mmol) in benzene (6 mL), DIBAL-H (1.0 M in toluene, 0.29 mL, 0.29 mmol, 5 equiv) was added at rt, and the resulting mixture was heated at 80 °C for 15 h. The reaction was cooled to rt, quenched with sat. NaHCO<sub>3</sub> (10 mL) and brine (10 mL), extracted with CH<sub>2</sub>Cl<sub>2</sub> (3 x 30 mL), dried and concentrated. Chromatography (1/2/98-1/10/90 NH<sub>4</sub>OH/MeOH/CH<sub>2</sub>Cl<sub>2</sub>) afforded the title compound as oil (*R<sub>f</sub>* = 0.48, 1/10/90 NH<sub>4</sub>OH/MeOH/CH<sub>2</sub>Cl<sub>2</sub>). Yield 67% (0.0135 g, 0.039 mmol). Single diastereoisomer. Stereochemistry determined by 2D NMR experiments. <sup>1</sup>H NMR (400 MHz, CDCl<sub>3</sub>) δ 0.95 (s, 9H), 1.38-1.44 (m, 1H), 1.61-1.89 (m, 6H), 1.91-2.09 (m, 4H), 2.16 (br, 1H), 2.69 (ddd, *J* = 5.3, 11.6, 13.8 Hz, 1H), 2.94-3.09 (m, 2H), 3.42-3.53 (m, 2H), 3.58-3.66 (m, 2H), 3.99-4.07 (m, 1H), 4.47 (s, 1H), 7.17-7.23 (m, 1H), 7.30-7.35 (m, 2H), 7.45-7.49 (m, 2H); <sup>13</sup>C NMR (100 MHz, CDCl<sub>3</sub>) δ 21.8, 27.8, 30.0, 32.2, 34.0, 38.1, 38.6, 43.2, 46.0, 50.4, 53.0, 61.6, 67.3, 96.0, 125.6, 126.0, 128.0, 150.6; IR (neat) 3368, 2956, 2865, 1555, 1468, 1453, 1393, 1365, 1258, 1126, 1099 cm<sup>-1</sup>; HRMS calcd for C<sub>22</sub>H<sub>35</sub>NO<sub>2</sub>Na (M<sup>+</sup> + Na) 368.2565, found 368.2565.

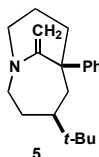

**(4R,6R)-4-*tert*-Butyl-10-methylene-6-phenyl-1-azabicyclo[4.3.1]decane (5).** To a solution of **2d** (0.0183 g, 0.049 mmol) in CH<sub>2</sub>Cl<sub>2</sub> (10 mL), Me<sub>3</sub>Al (2.0 M in toluene, 0.13 mL, 0.25 mmol, 5 equiv) was added at rt, and the resulting mixture was stirred at 40 °C for 15 h. The reaction was cooled to rt, quenched with sat. NaHCO<sub>3</sub> (10 mL) and brine (10 mL), extracted with CH<sub>2</sub>Cl<sub>2</sub> (3 x 30 mL), dried and concentrated. Chromatography (1/1 EtOAc/hexanes-EtOAc) afforded the title compound as oil (*R<sub>f</sub>* = 0.20, 1/4 EtOAc/hexanes). Yield 56% (0.0078 g, 0.028 mmol). Spectroscopic properties matched those previously described.<sup>6</sup> In addition, the reaction of the orthoamide **2h** under the above reaction conditions afforded the corresponding bridged enamine **2ha** in 51% yield (Scheme O).

**Scheme O. Synthesis of bridged enamine from orthoamide **2h****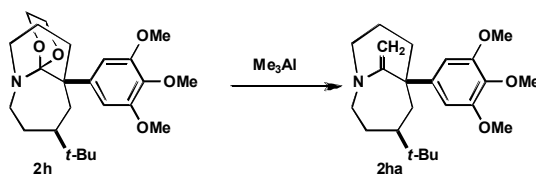

**(4R,6R)-4-*tert*-Butyl-10-methylene-6-(3,4,5-trimethoxyphenyl)-1-azabicyclo[4.3.1]decane (**2ha**).** To a solution of **2h** (0.0190 g, 0.045 mmol) in CH<sub>2</sub>Cl<sub>2</sub> (10 mL), Me<sub>3</sub>Al (2.0 M in toluene, 0.11 mL, 0.23 mmol, 5 equiv) was added at rt, and the resulting mixture was stirred at rt for 15 h. The reaction was quenched with sat. NaHCO<sub>3</sub> (10 mL) and brine (10 mL), extracted with CH<sub>2</sub>Cl<sub>2</sub> (3 x 30 mL), dried and concentrated. Chromatography (EtOAc-1/4 MeOH/EtOAc) afforded the title compound as oil (R<sub>f</sub> = 0.48, 1/4 MeOH/EtOAc). Yield 51% (0.0086 g, 0.023 mmol). <sup>1</sup>H NMR (400 MHz, CDCl<sub>3</sub>) δ 0.98 (s, 9H), 1.54-1.80 (m, 6H), 1.88-1.93 (m, 1H), 2.02-2.11 (m, 1H), 2.22-2.29 (m, 1H), 2.65 (td, *J* = 5.0, 12.7 Hz, 1H), 2.97-3.06 (m, 1H), 3.41-3.47 (m, 1H), 3.58 (dd, *J* = 3.7, 12.9 Hz, 1H), 3.87 (s, 3H), 3.88 (s, 6H), 4.32 (s, 1H), 4.79 (s, 1H), 6.71 (s, 2H); <sup>13</sup>C NMR (100 MHz, CDCl<sub>3</sub>) δ 22.2, 27.9, 28.0, 34.0, 39.9, 44.1, 44.9, 47.3, 54.6, 55.5, 56.3, 60.9, 105.1, 110.7, 136.2, 147.4, 152.2, 156.1; IR (neat) 2943, 2865, 1627, 1585, 1555, 1511, 1464, 1410, 1365, 1243, 1186, 1130, 1104, 1012, 913, 824, 864 cm<sup>-1</sup>; HRMS calcd for C<sub>23</sub>H<sub>36</sub>NO<sub>3</sub> (M<sup>+</sup> + H) 374.2695, found 374.2693.

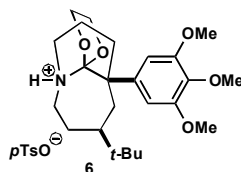

**Salt 6.** To a solution of  $\alpha$ -amino ketal **2h** (0.0247 g, 0.059 mmol, 1.0 equiv) in acetone (2.0 mL), *p*TsOH (0.0112 g, 0.059 mmol, 1.0 equiv) was added in acetone (0.5 mL). Et<sub>2</sub>O (2.5 mL) was added and the reaction mixture was stirred at rt for 20 h. The solvent was removed to afford the title compound as white foam. Yield 96% (0.0345 g, 0.057 mmol). Note: the compound is unstable. <sup>1</sup>H NMR (400 MHz, CDCl<sub>3</sub>) δ 0.90 (s, 9H), 1.68-1.78 (m, 2H), 1.92-2.04 (m, 2H), 2.06-2.20 (m, 3H), 2.25-2.38 (m, 1H), 2.35 (s, 3H), 2.70 (td, *J* = 4.6, 13.8 Hz, 1H), 2.97 (td, *J* = 3.7, 14.4 Hz, 1H), 3.25 (q, *J* = 7.6 Hz, 1H), 3.35 (d, *J* = 8.4 Hz, 1H), 3.78 (td, *J* = 4.0, 13.8 Hz, 1H), 3.86 (s, 3H), 3.87 (s, 6H), 4.09-4.19 (m, 2H), 4.33-4.39 (m, 1H), 4.71 (q, *J* = 7.9 Hz, 1H), 6.74 (s, 2H), 7.17 (d, *J* = 7.9 Hz, 2H), 7.77 (d, *J* = 7.9 Hz, 2H), 10.80 (br, 1H); <sup>13</sup>C NMR (100 MHz, CDCl<sub>3</sub>) δ 18.3, 21.3, 26.5, 27.4, 31.9, 34.1, 41.4, 45.7, 46.7, 51.3, 52.0, 56.4, 60.9, 66.9, 67.2, 105.0, 118.3, 125.9, 128.8, 137.3, 139.9, 140.1, 142.4, 152.3; IR (neat) 3467, 2963, 1586, 1514, 1461, 1413, 1319, 1231, 1165, 1122, 1034, 1010, 962, 914 cm<sup>-1</sup>; HRMS calcd for C<sub>24</sub>H<sub>38</sub>NO<sub>5</sub> (M<sup>+</sup>) 420.2750, found 420.2737.

### References

1. Yao, L.; Aubé, J. *J. Am. Chem. Soc.*, **2007**, *129*, 2766-2767.
2. Szostak, M.; Yao, L.; Aubé, J. *J. Org. Chem.*, **2010**, *in press*.
3. Szostak, M.; Yao, L.; Aubé, J. *Org. Lett.*, **2009**, *11*, 4386-4389.
4. Mossman, C. J.; Aubé, J. *Tetrahedron*, **1996**, *52*, 3403-3408.
5. Wilt, J. W.; Philip, H. *J. Org. Chem.*, **1960**, *25*, 891-899.
6. Szostak, M.; Yao, L.; Aubé, J. *J. Am. Chem. Soc.*, **2010**, *in press*.
7. Wuts, P. G. M.; Greene, T. W. *Greene's Protective Groups in Organic Synthesis*, Wiley-Interscience; 4<sup>th</sup> edition, p. 448 and p. 471.
8. Szostak, M.; Aubé, J. *Org. Lett.*, **2009**, *11*, 3878-3881.

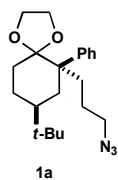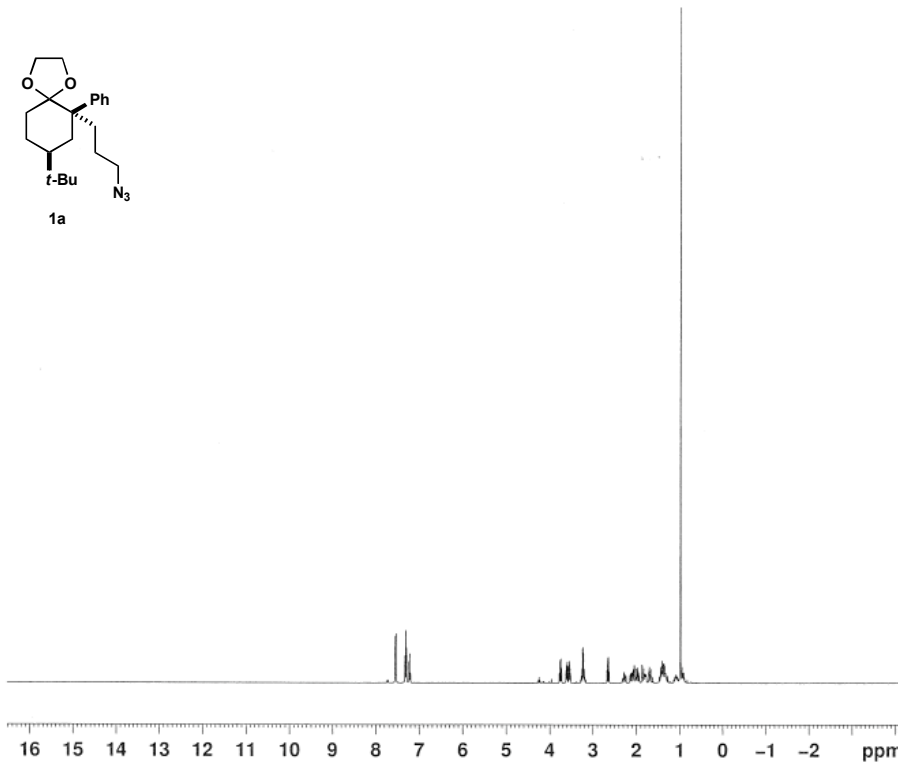

```

NAME          mszo-8-243
EXPNO         1
PROCNO        1
Date_         20091021
Time          10.04
INSTRUM       spect
PROBHD        5 mm QNP 1H/15
PULPROG       zg30
TD            65536
SOLVENT       CDCl3
NS            8
DS            2
SWH           8278.146 Hz
FIDRES        0.126314 Hz
AQ            3.9584243 sec
RG            4
DM            60.400 usec
DE            6.50 usec
TE            296.7 K
D1            1.00000000 sec
TD0           1
    
```

```

===== CHANNEL f1 =====
NUC1          1H
PI            8.00 usec
PL1          -5.00 dB
PL1W         39.71641159 W
SF01         400.1324710 MHz
SI           32768
SF           400.1300000 MHz
WDW           EM
SSB           0
LB           0.30 Hz
GB           0
PC           1.40
    
```

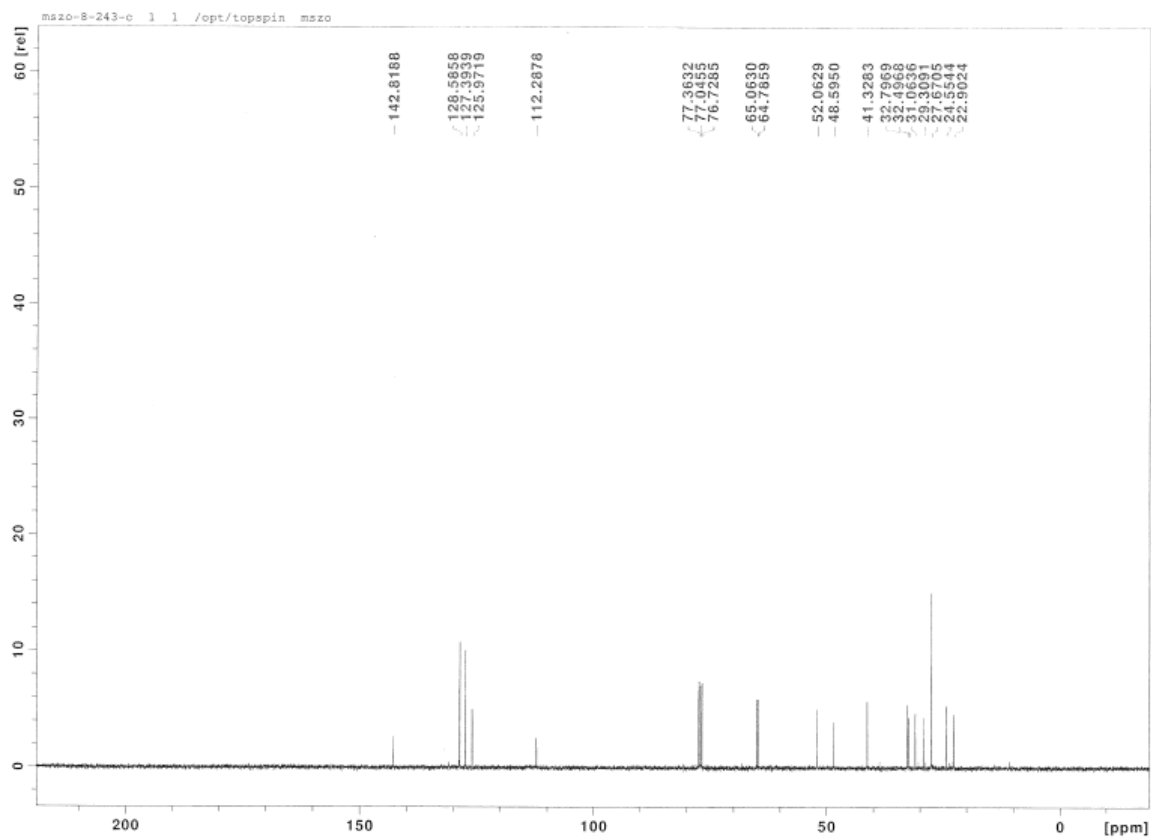



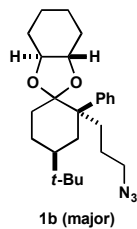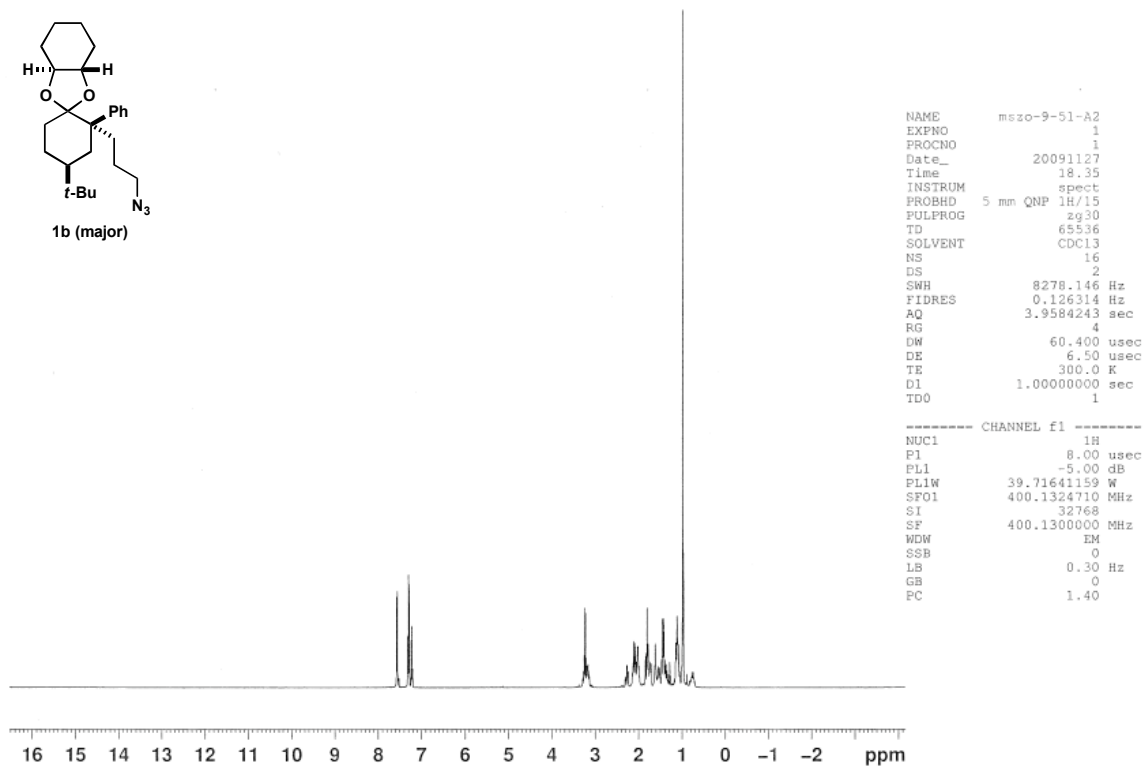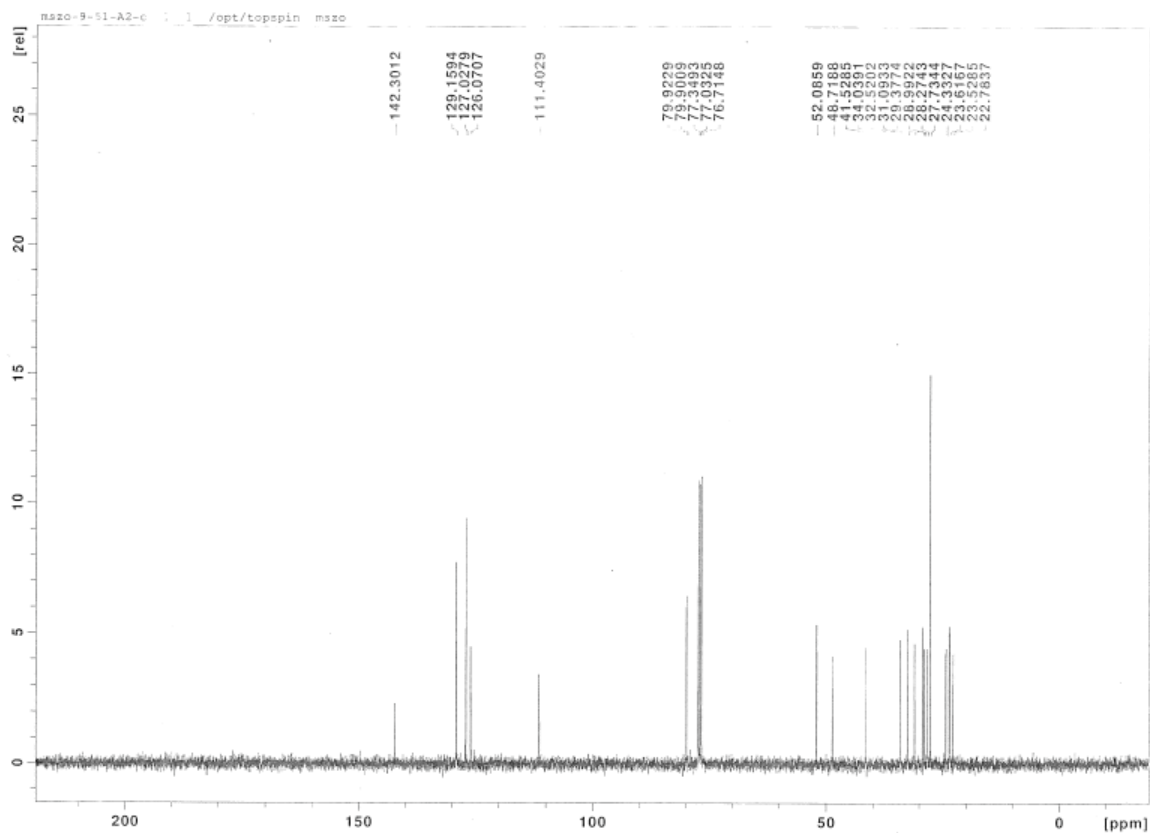

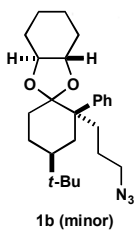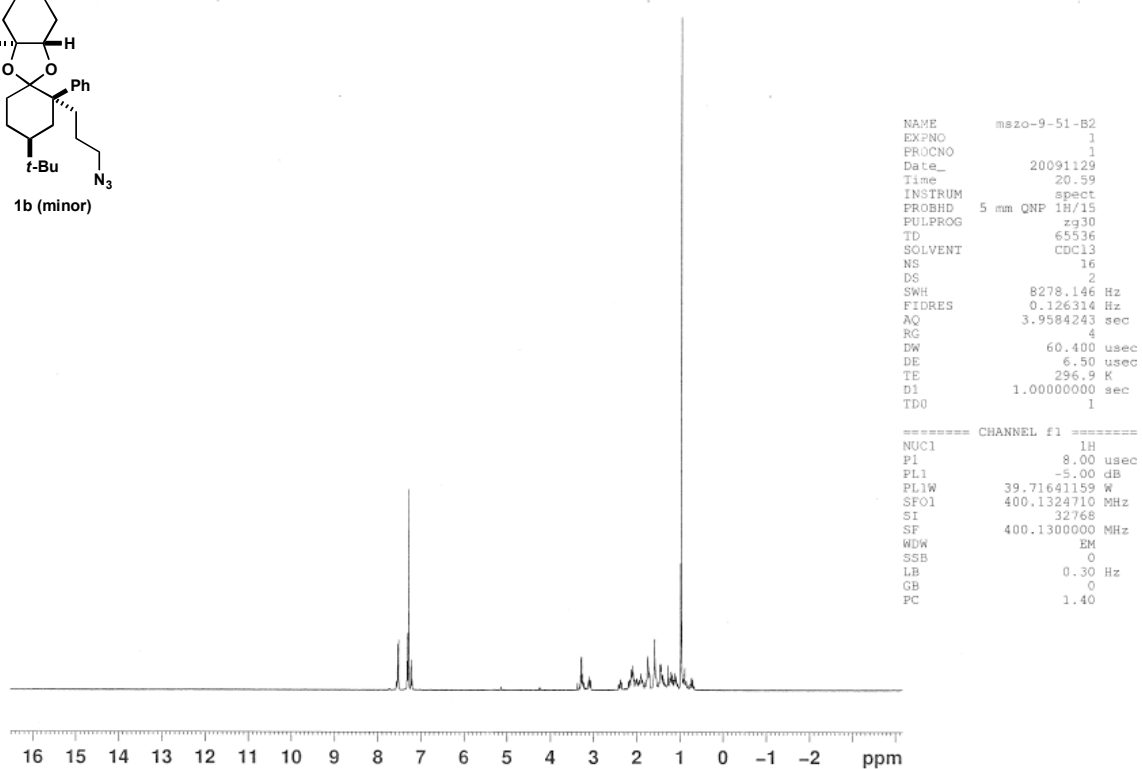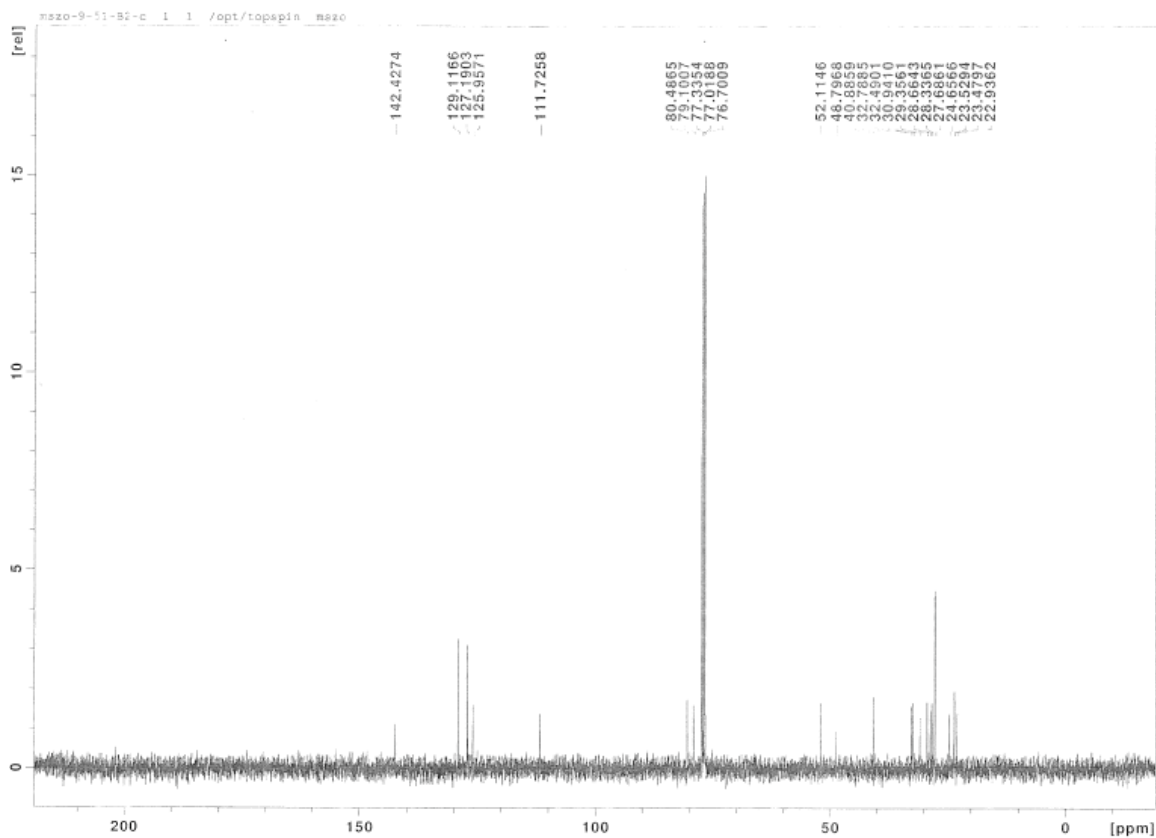

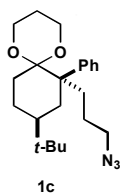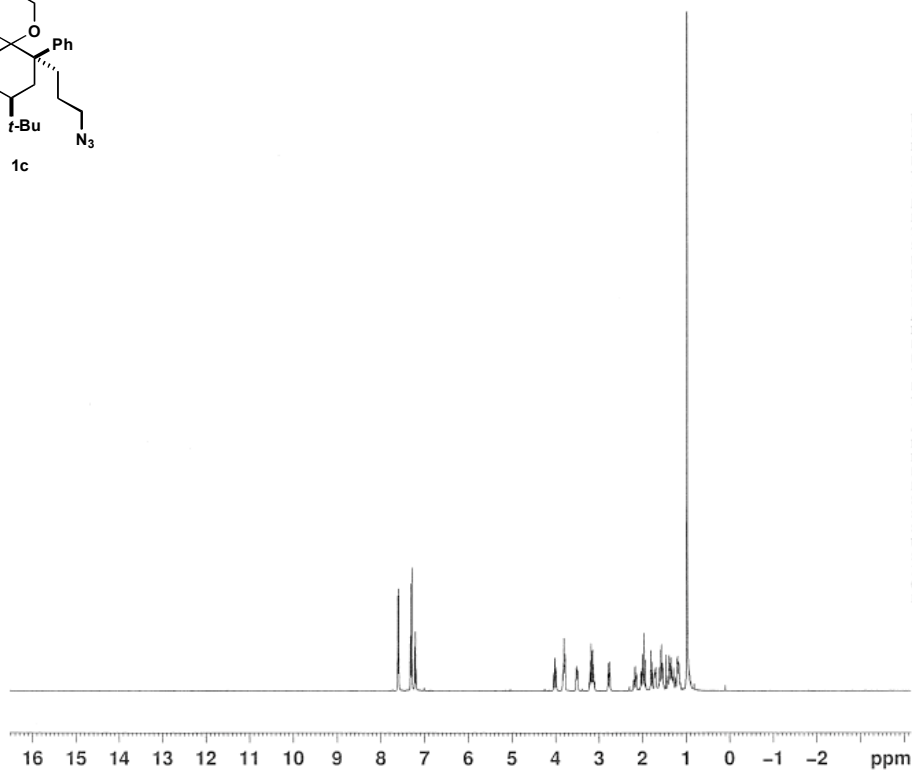

```

NAME      mszo-8-251-A
EXPNO     2
PROCNO    1
Date_     20091028
Time      10.24
INSTRUM   spect
PROBHD    5 mm QNP 1H/15
PULPROG   zg30
TD         65536
SOLVENT   CDC13
NS         16
DS         2
SWH        8278.146 Hz
FIDRES     0.126314 Hz
AQ          3.9584243 sec
RG          4
DW          60.400 usec
DE          6.50 usec
TE          296.6 K
D1          1.00000000 sec
TD0         1
    
```

```

===== CHANNEL f1 =====
NUC1      1H
P1         8.00 usec
PL1        -5.00 dB
PL1W       39.71641159 W
SFO1      400.1324710 MHz
SI         32768
SF         400.1300000 MHz
WDW        EM
SSB         0
LB          0.30 Hz
GB          0
PC          1.00
    
```

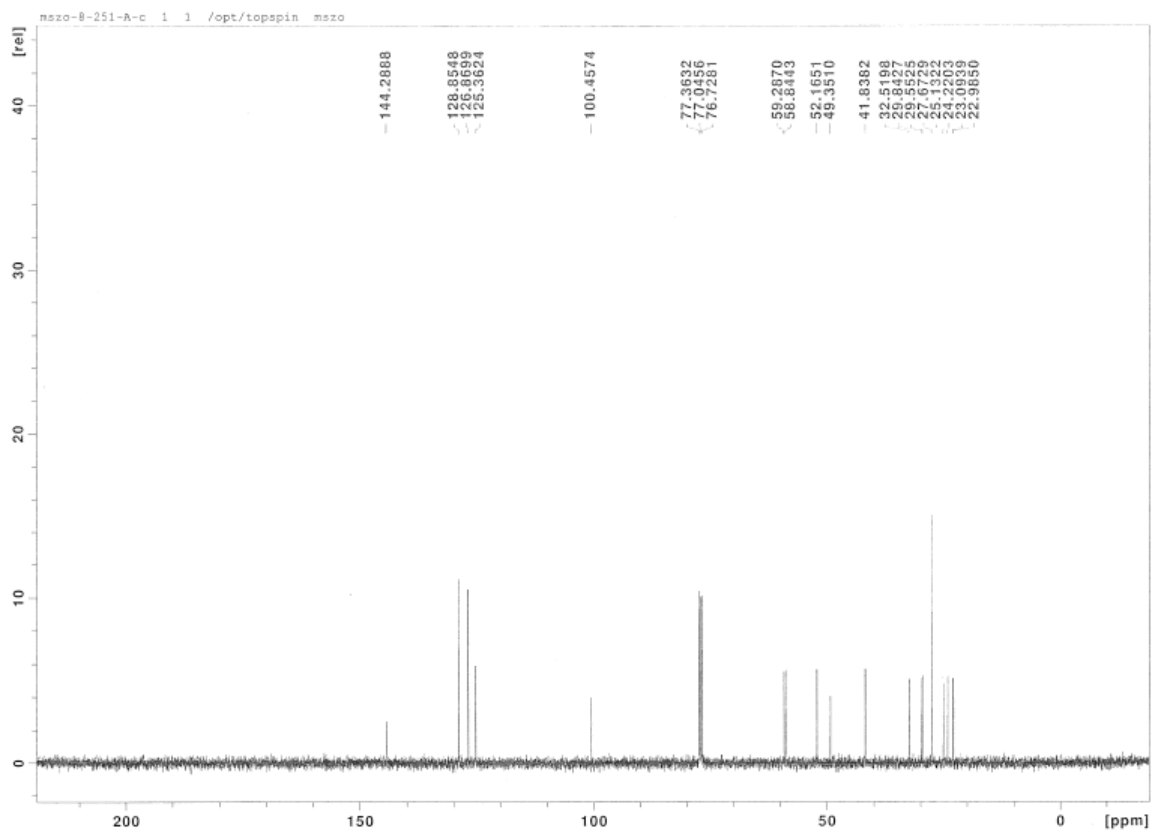

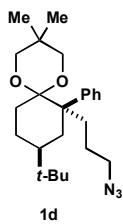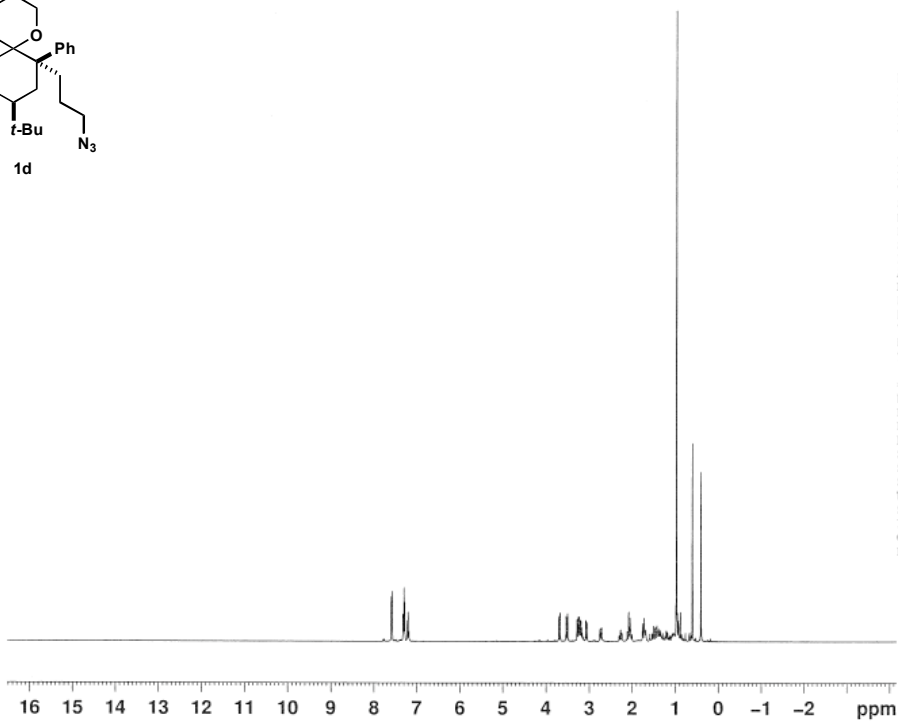

```

NAME          mszo-8-297
EXPNO         1
PROCNO        1
Date_         20091113
Time         17.05
INSTRUM       spect
PROBHD        5 mm QNP 1H/15
PULPROG       zg30
TD            65536
SOLVENT       CDCl3
NS            9
DS            2
SWH           8278.146 Hz
FIDRES        0.126314 Hz
AQ           3.9584243 sec
RG            4
RG            4
DW           60.400 usec
DE           6.50 usec
TE           297.2 K
D1           1.00000000 sec
D10          1
----- CHANNEL f1 -----
NUC1          1H
P1            8.00 usec
PL1          -5.00 dB
PL1W         39.71641159 W
SFO1         400.1324710 MHz
SI           32768
SF           400.1300000 MHz
WDW           EM
SSB           0
LB           0.30 Hz
GB            0
PC           1.00
    
```

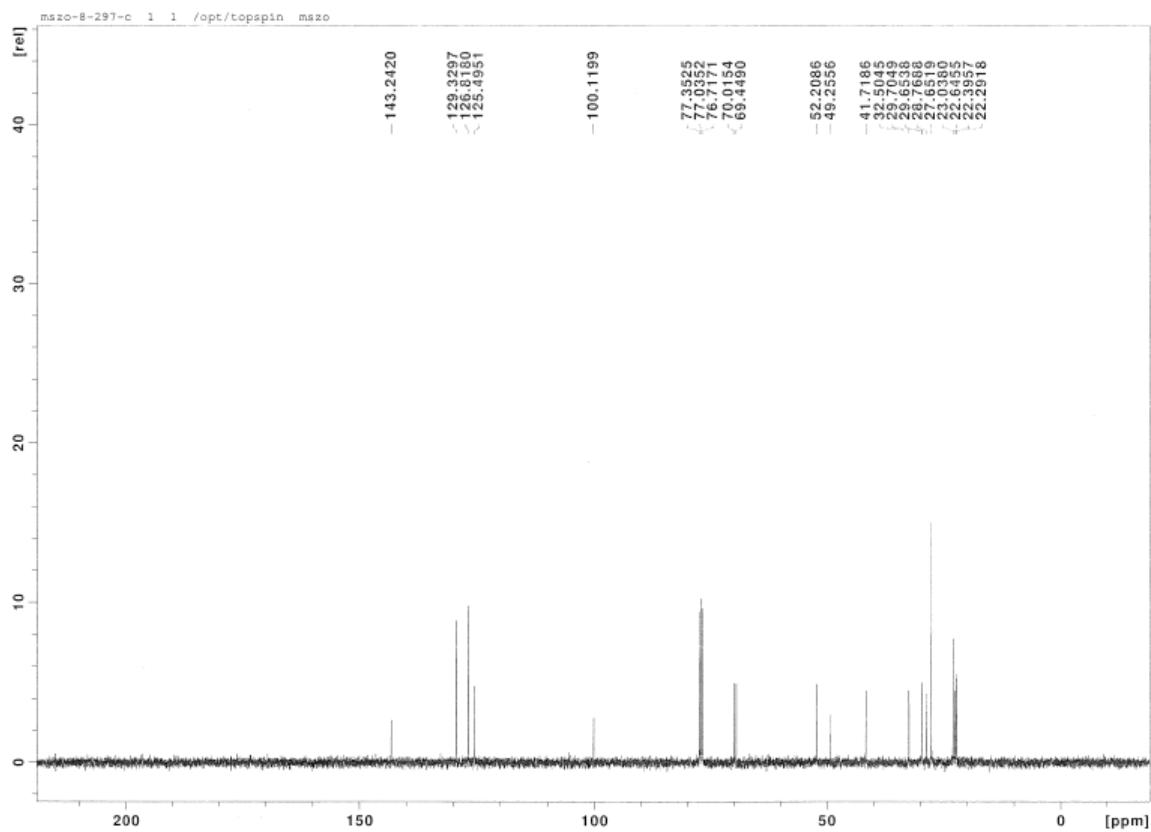

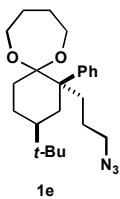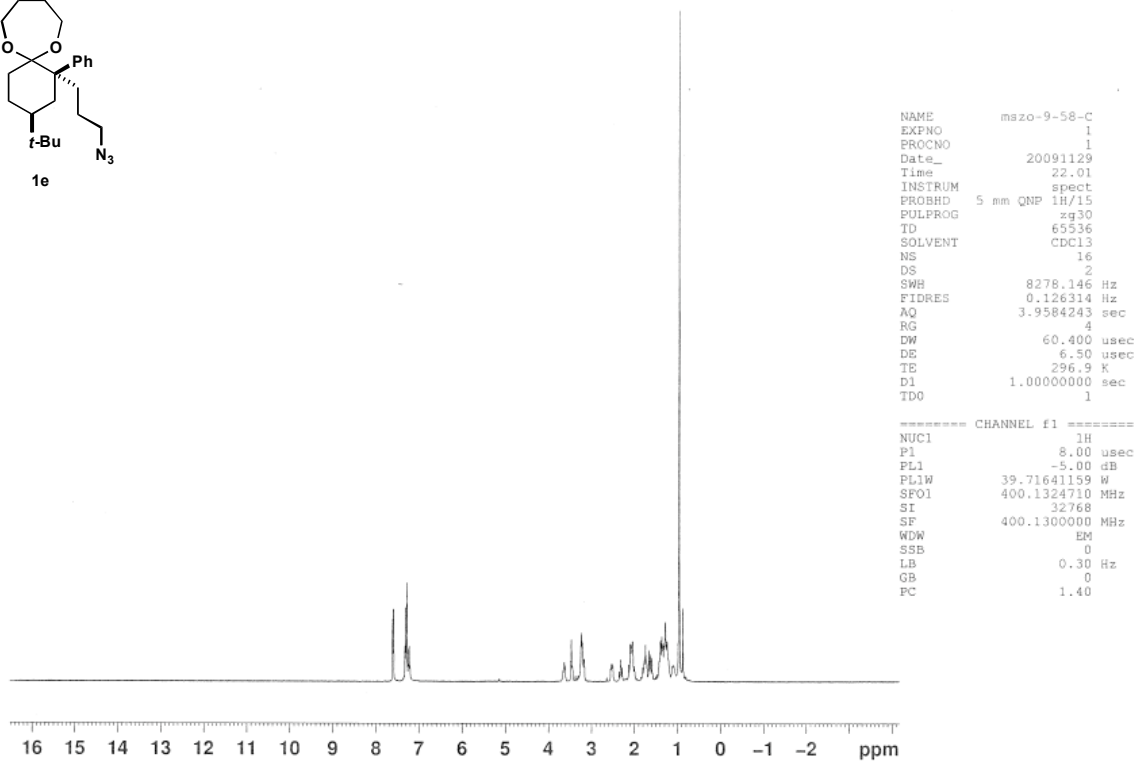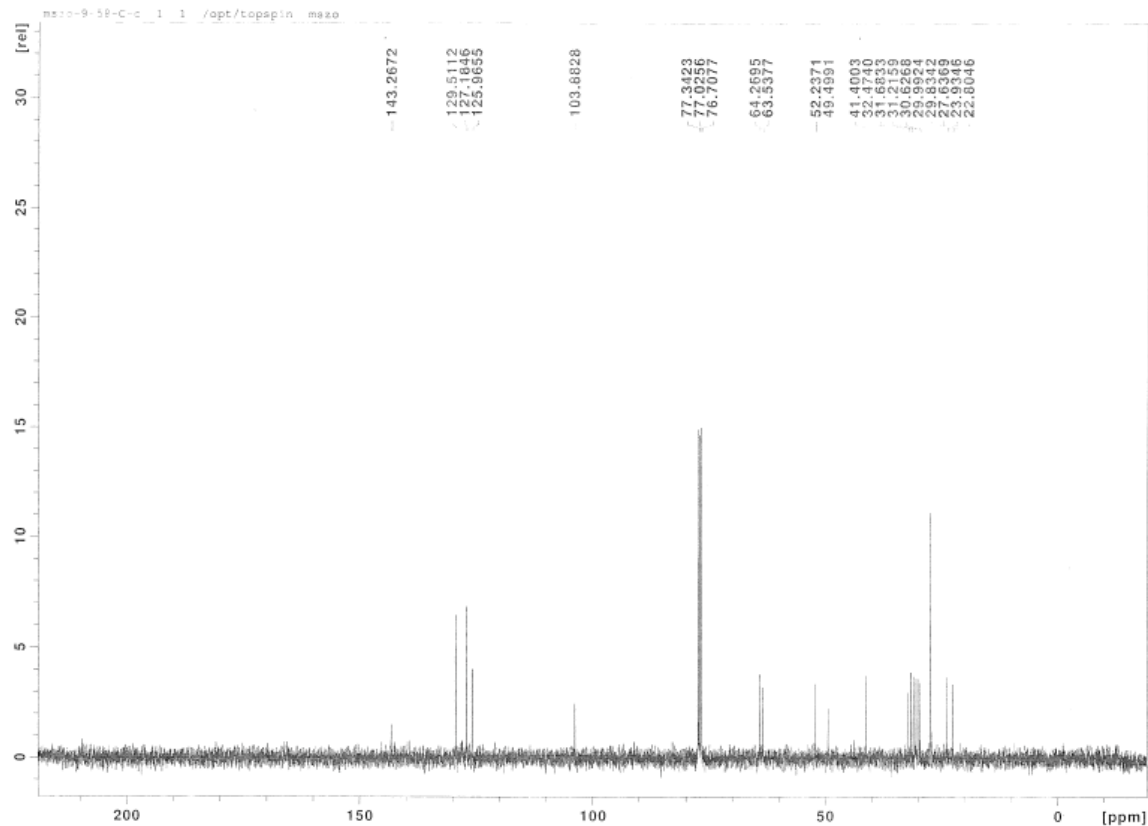

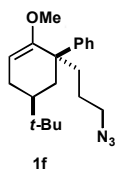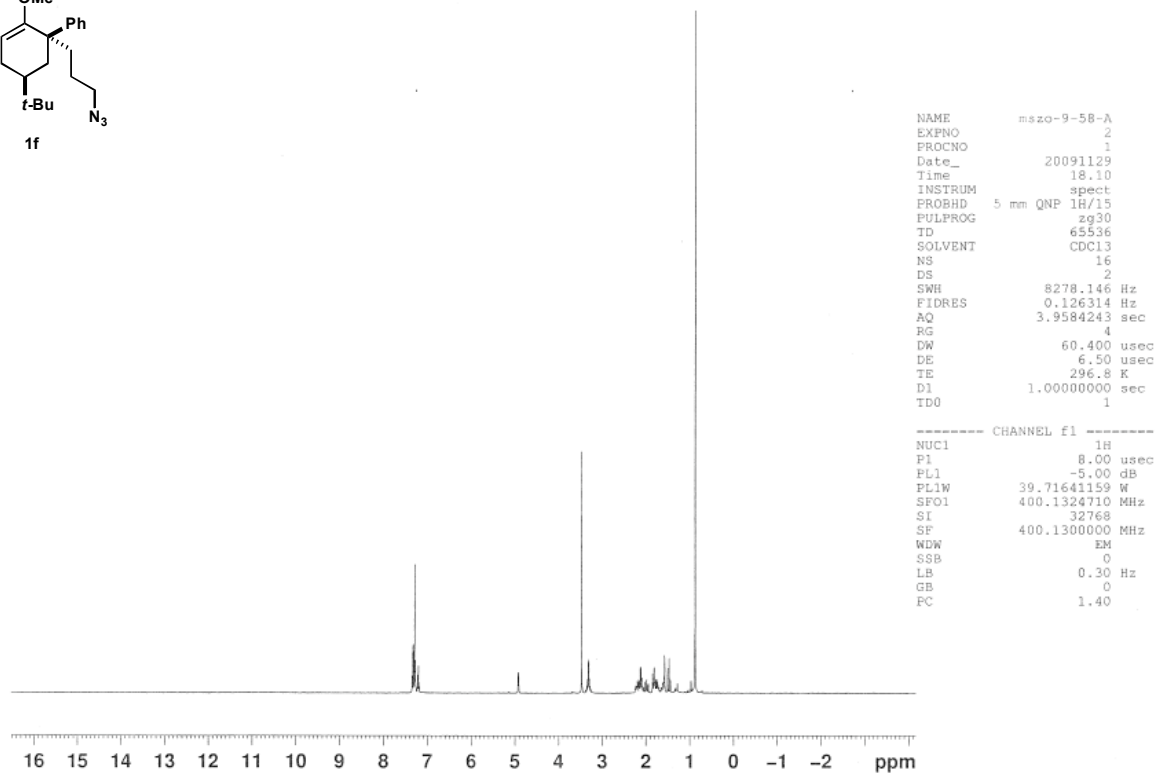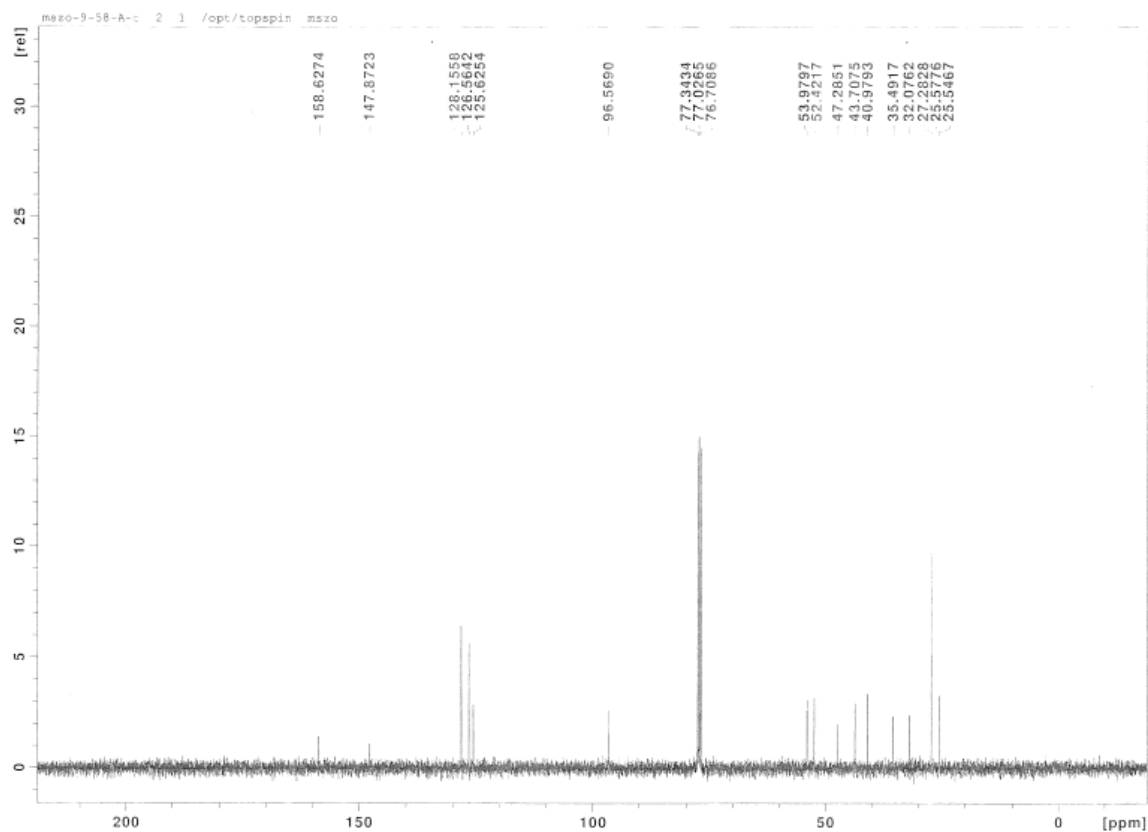

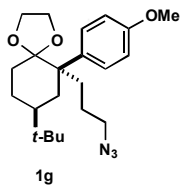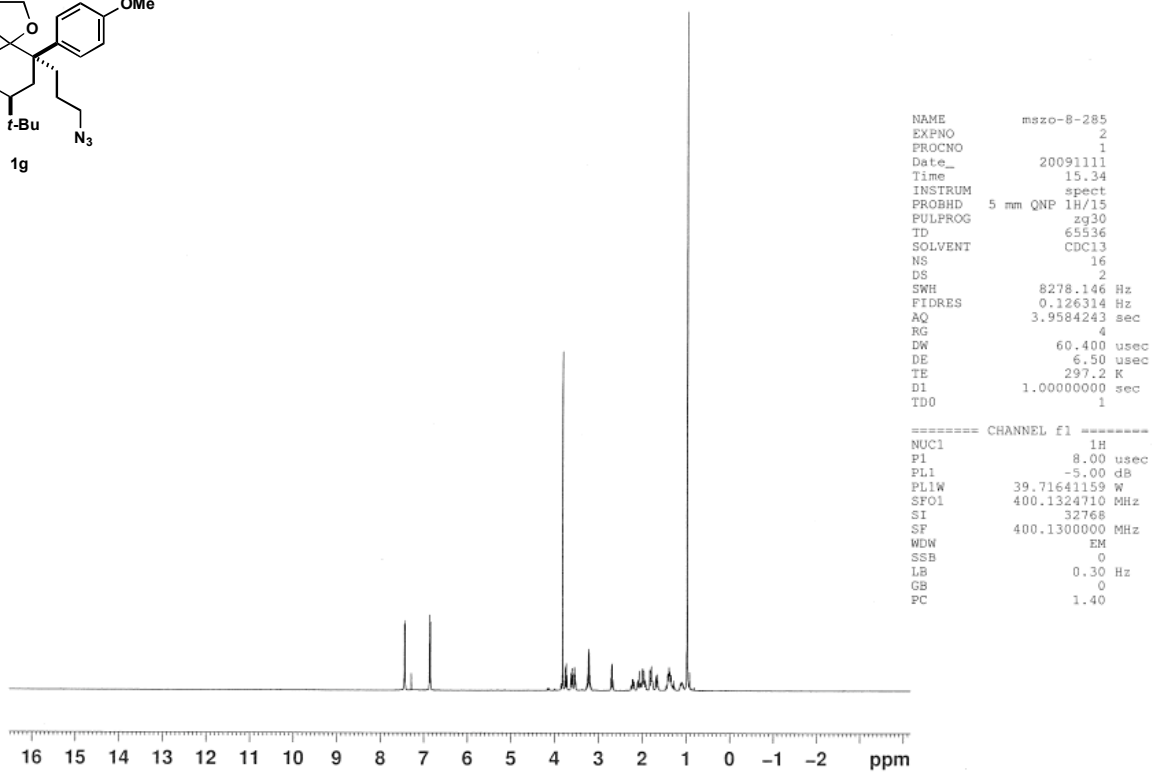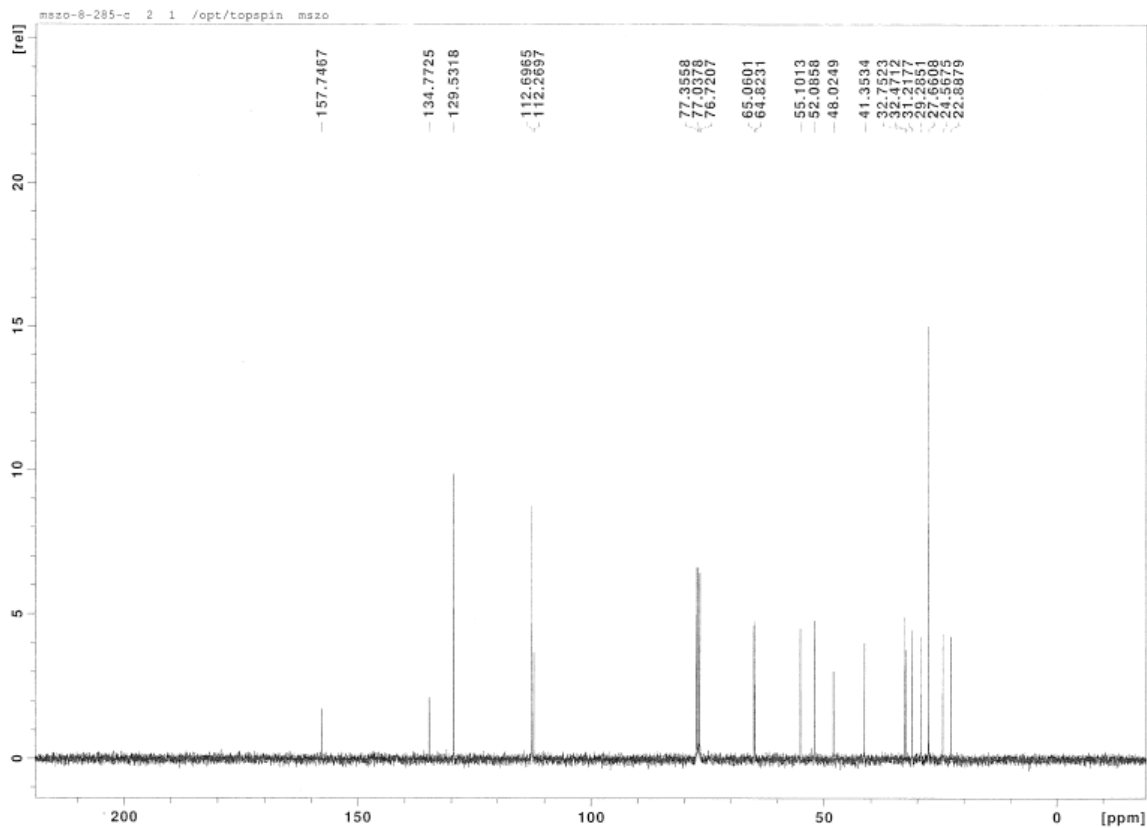

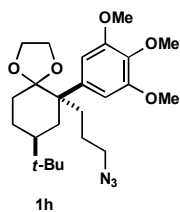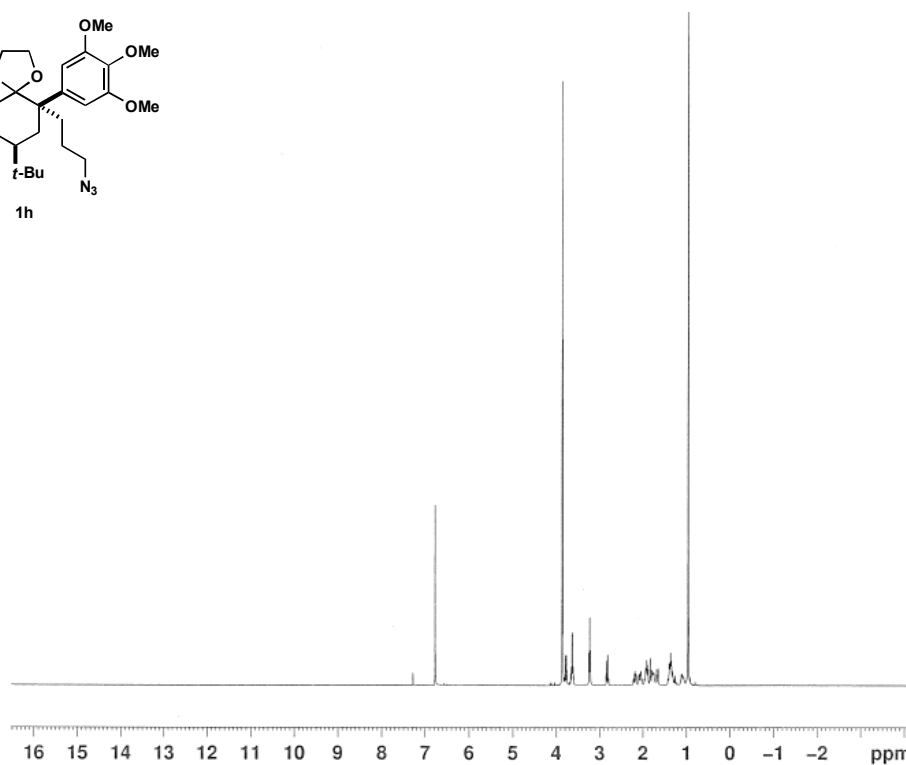

```

NAME      mszo-8-267
EXPNO     1
PROCNO    1
Date_     20091106
Time      19.18
INSTRUM   spect
PROBHD    5 mm QNP 1H/15
PULPROG   zg30
TD         65536
SOLVENT   CDC13
NS         9
DS         2
SWH        8278.146 Hz
FIDRES     0.126314 Hz
AQ         3.9584243 sec
RG         4
DW         60.400 usec
DE         6.50 usec
TE         297.7 K
D1         1.00000000 sec
TD0        1

===== CHANNEL f1 =====
NUC1      1H
P1         8.00 usec
PL1        -5.00 dB
PL1W      39.71641159 W
SF01      400.1324710 MHz
SI         32768
SF         400.1300000 MHz
WDW        EM
SSB         0
LB         0.30 Hz
GB         0
PC         1.40
    
```

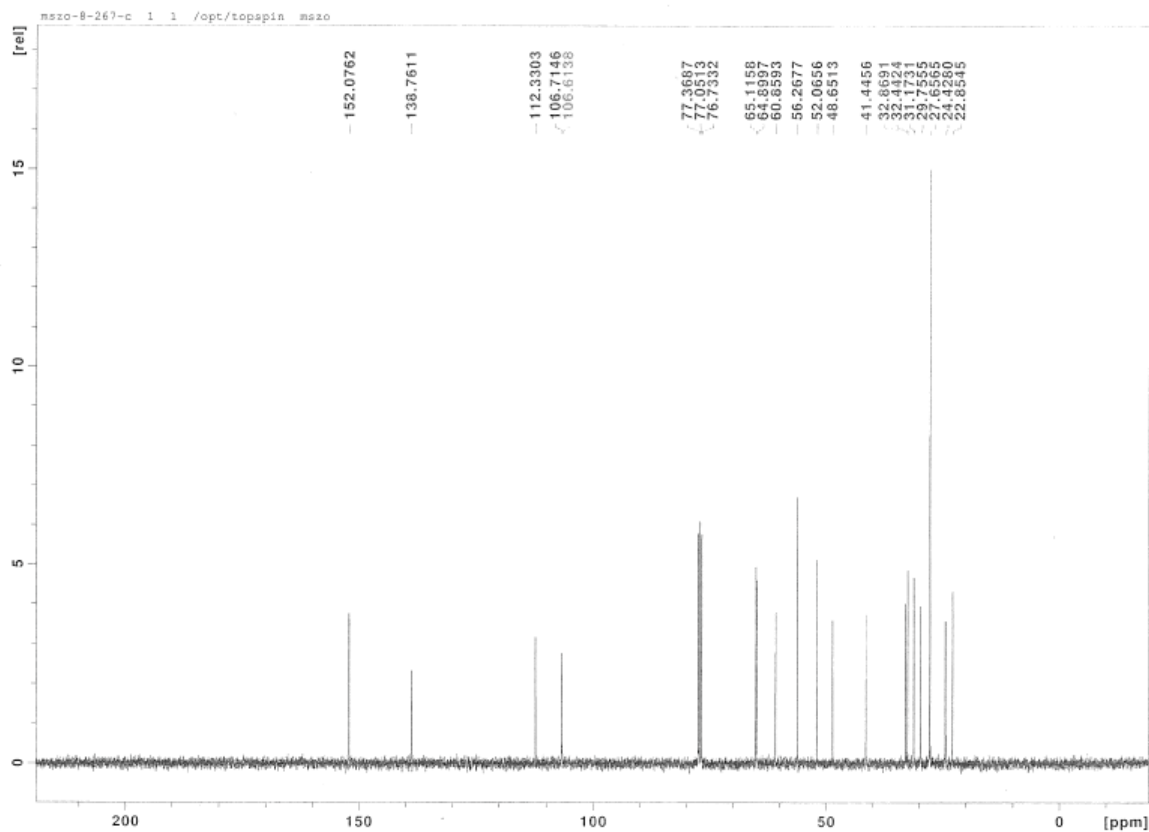



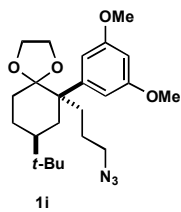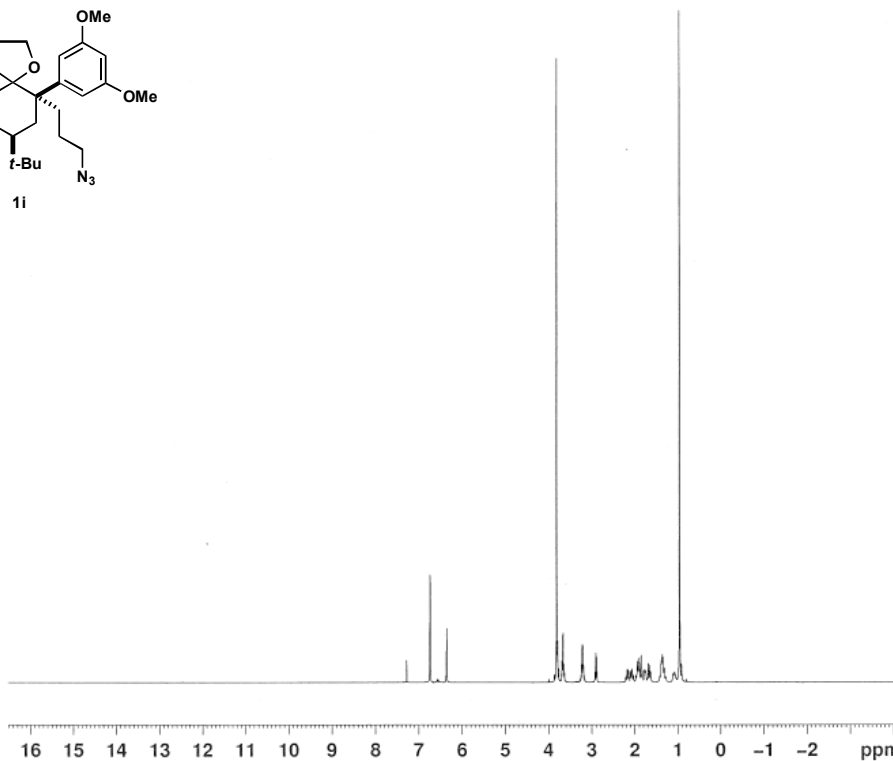

```

NAME      mszo-8-291-A
EXPNO     1
PROCNO    1
Date_     20091112
Time      21.25
INSTRUM   spect
PROBHD    5 mm QNP 1H/15
PULPROG   zg30
TD         65536
SOLVENT   CDCl3
NS         16
DS         2
SWH        8278.146 Hz
FIDRES     0.126314 Hz
AQ         3.9584243 sec
RG         4
DW         60.400 usec
DE         6.50 usec
TE         300.0 K
D1         1.00000000 sec
TDO        1

===== CHANNEL f1 =====
NUC1      1H
P1         8.00 usec
PL1        -5.00 dB
PL1W      39.71641159 W
SFO1      400.1324710 MHz
SI         32768
SF         400.1300000 MHz
WDW        EM
SSB        0
LB         0.30 Hz
GB         0
PC         1.00
    
```

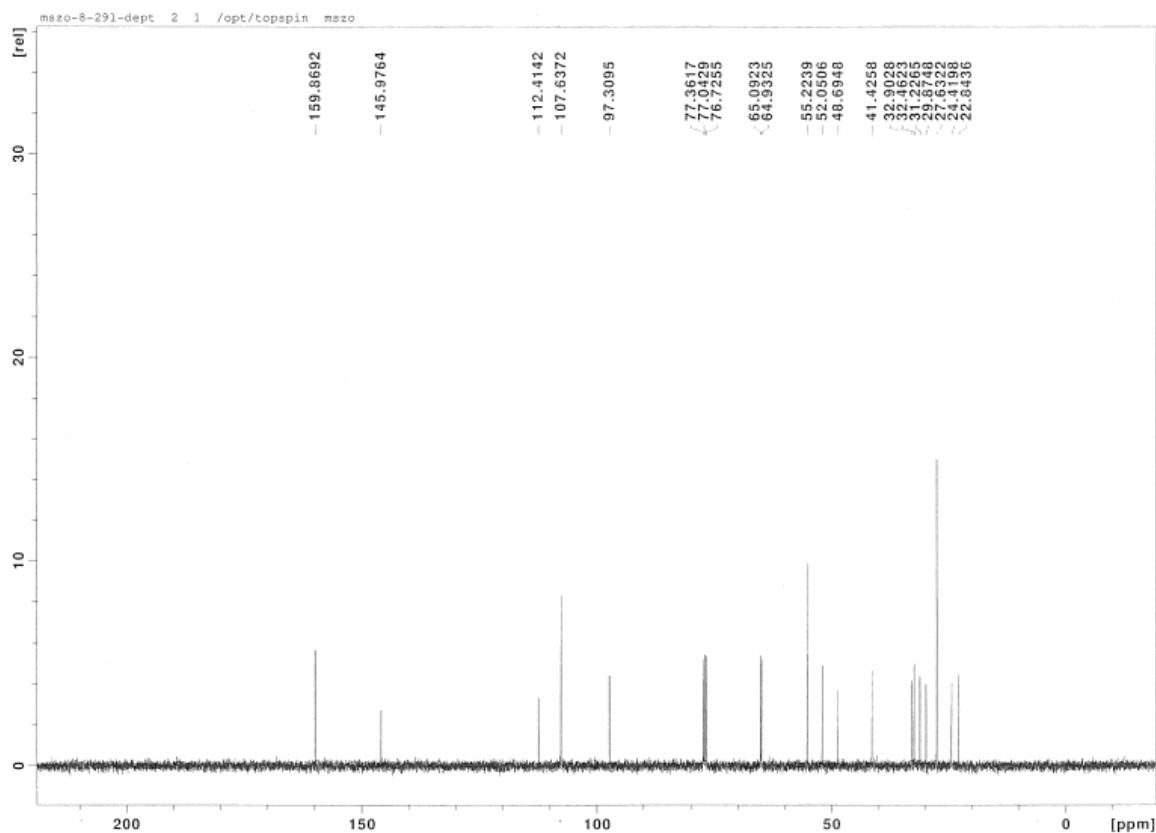

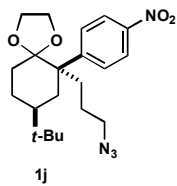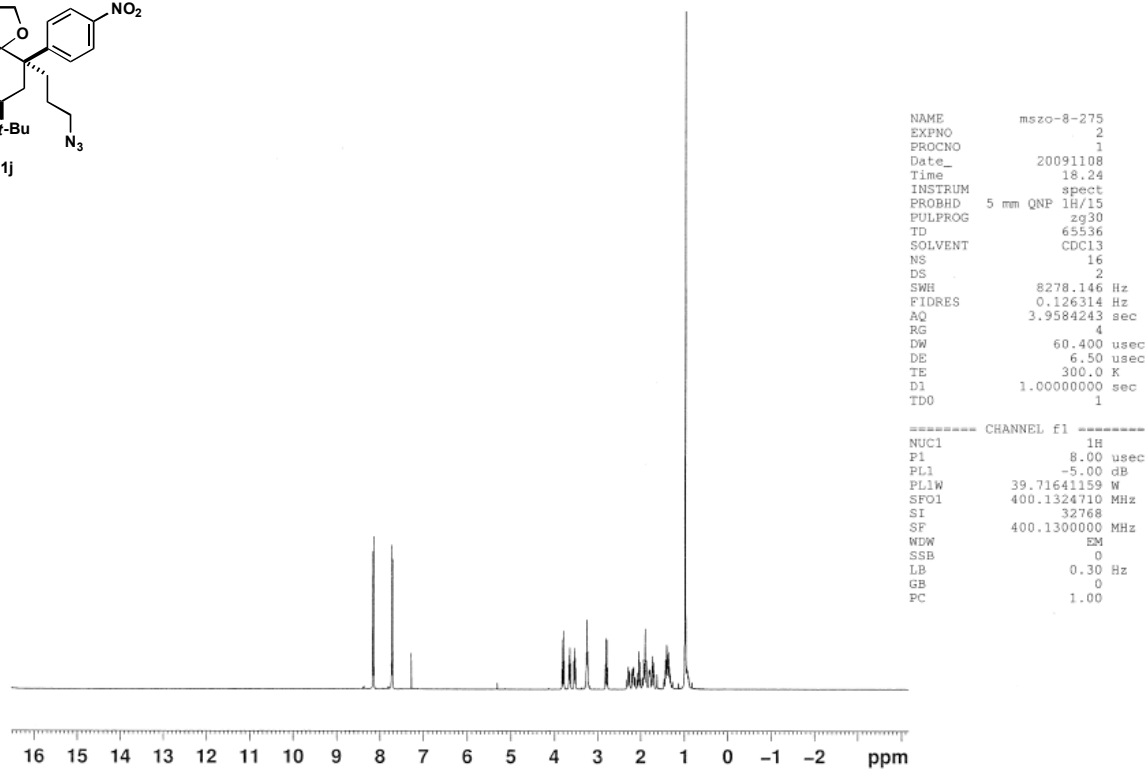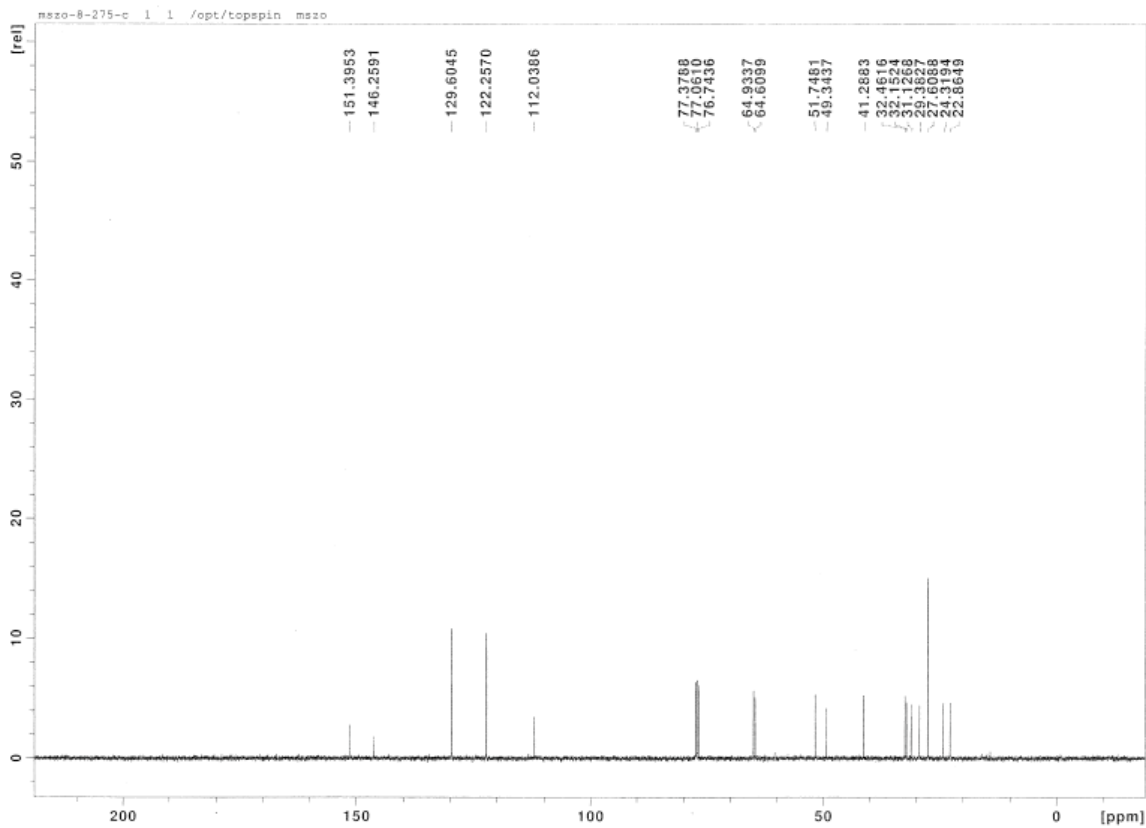

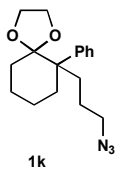

```

NAME      mszo-8-279
EXPNO    2
PROCNO   1
Date_    20091110
Time     16.39
INSTRUM  spect
PROBHD   5 mm QNP 1H/15
PULPROG  zg30
TD       65536
SOLVENT  CDCl3
NS       16
DS       2
SWH      8278.146 Hz
FIDRES   0.126314 Hz
AQ       3.9584243 sec
RG       4
DW       60.400 usec
DE       6.50 usec
TE       296.3 K
D1       1.00000000 sec
TD0      1
    
```

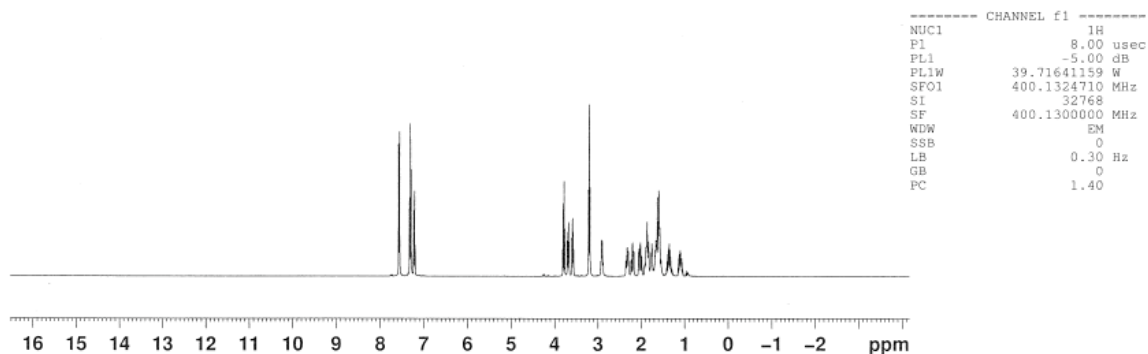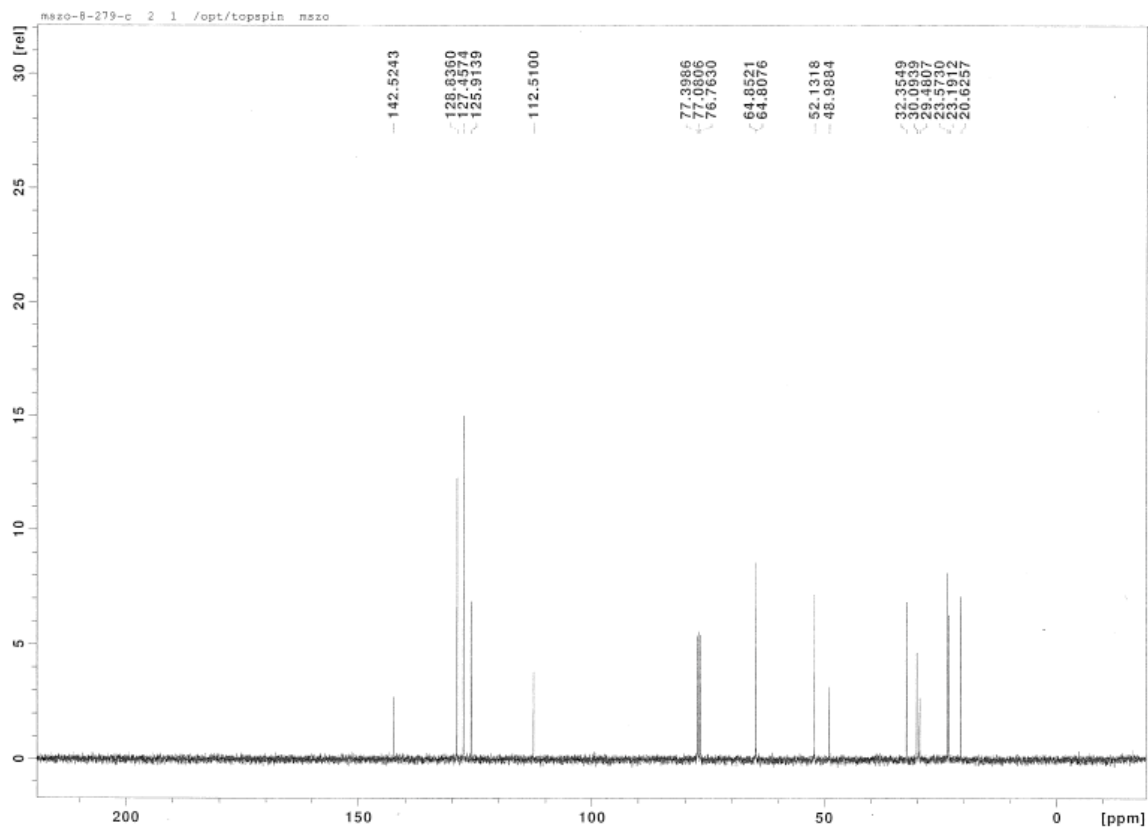

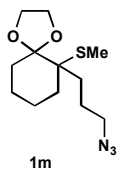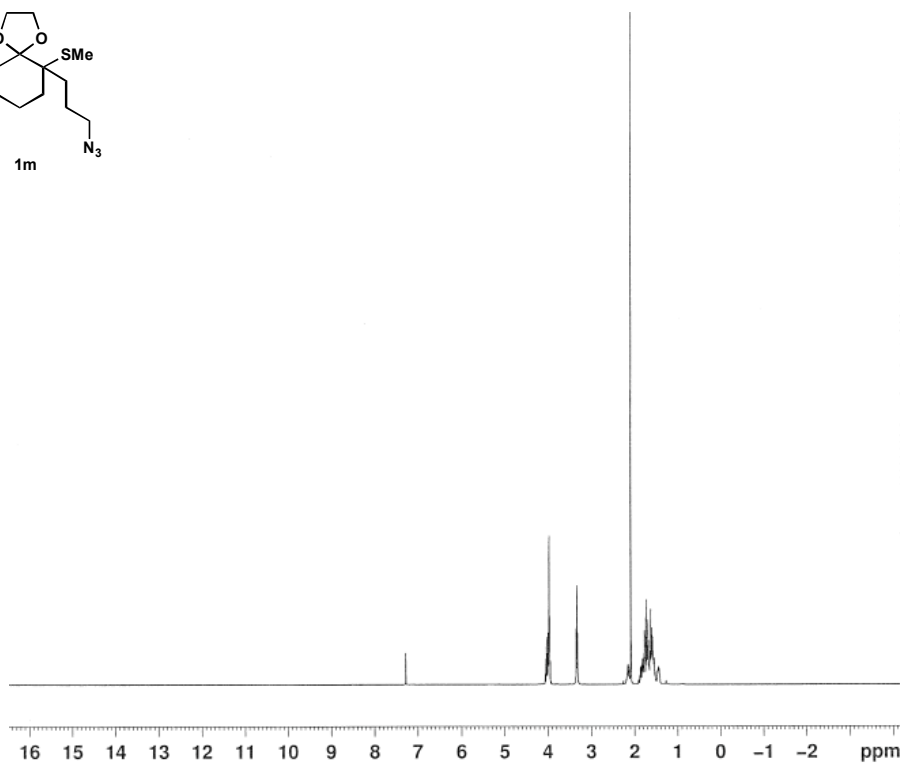

```

NAME          mszo-8-295
EXPNO         2
PROCNO        1
Date_         20091112
Time          21.35
INSTRUM       spect
PROBHD        5 mm QNP 1H/15
PULPROG       zg30
TD            65536
SOLVENT       CDCl3
NS            16
DS            2
SWH           8278.146 Hz
FIDRES        0.126314 Hz
AQ            3.9584243 sec
RG            4
DW            60.400 usec
DE            6.50 usec
TE            297.2 K
D1            1.00000000 sec
TDO           1
    
```

```

----- CHANNEL f1 -----
NUC1          1H
P1            8.00 usec
PL1          -5.00 dB
PL1W         39.71641159 W
SF01         400.1324710 MHz
SI           32768
SF           400.1300000 MHz
WDW          EM
SSB          0
LB           0.30 Hz
GB           0
PC           1.00
    
```

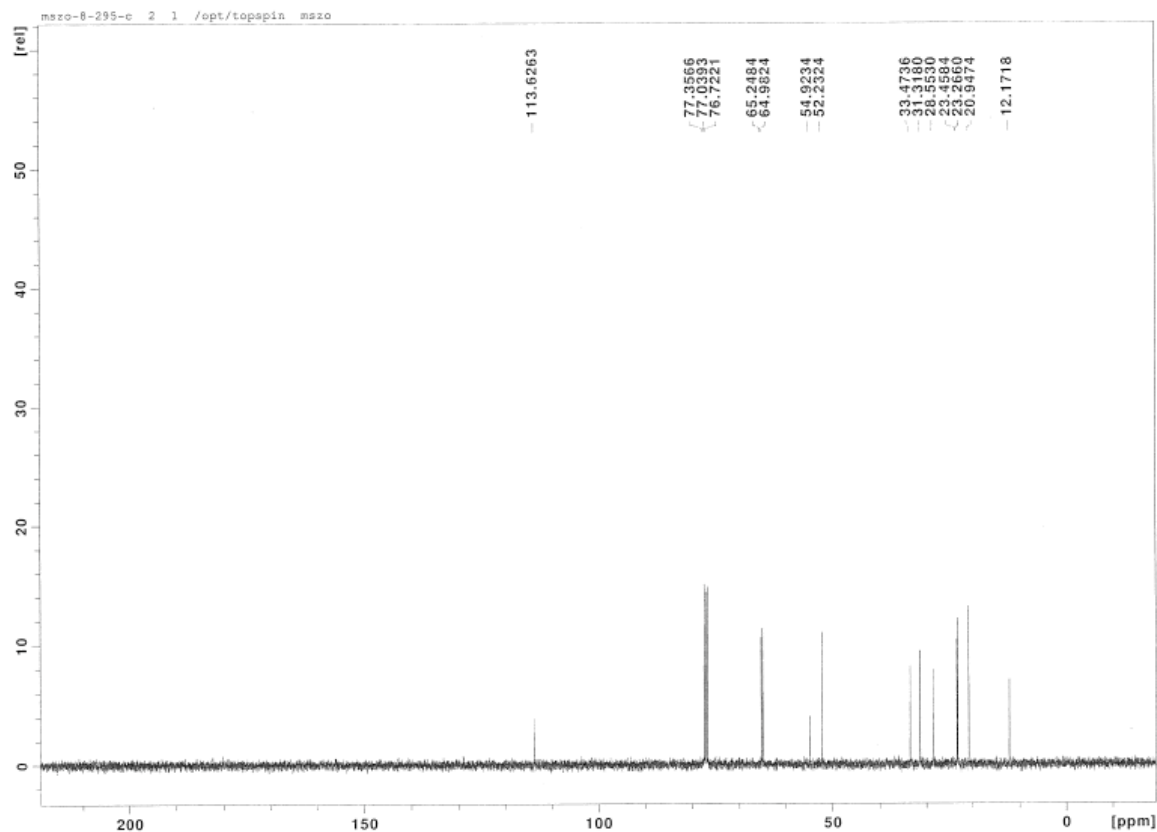

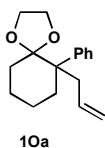

```

NAME          mszo-9-22
EXPNO         2
PROCNO       1
Date_         20091119
Time         20.13
INSTRUM      spect
PROBHD       5 mm QNP 1H/15
PULPROG      zg30
TD           65536
SOLVENT      CDCl3
NS           16
DS           2
SWH          8278.146 Hz
FIDRES       0.126314 Hz
AQ           3.9584243 sec
RG           4
DW           60.400 usec
DE           6.50 usec
TE           296.8 K
D1           1.00000000 sec
TD0          1
    
```

```

===== CHANNEL f1 =====
NUC1          1H
P1            8.00 usec
PL1          -5.00 dB
PL1W         39.71641159 W
SFO1         400.1324710 MHz
SI           32768
SF           400.1300000 MHz
WDW           EM
SSB           0
LB           0.30 Hz
GB           0
PC           1.40
    
```

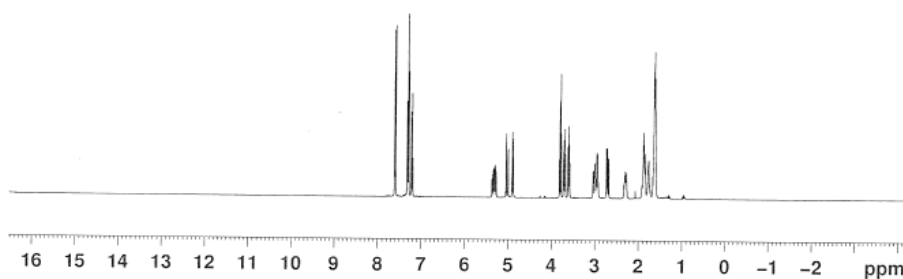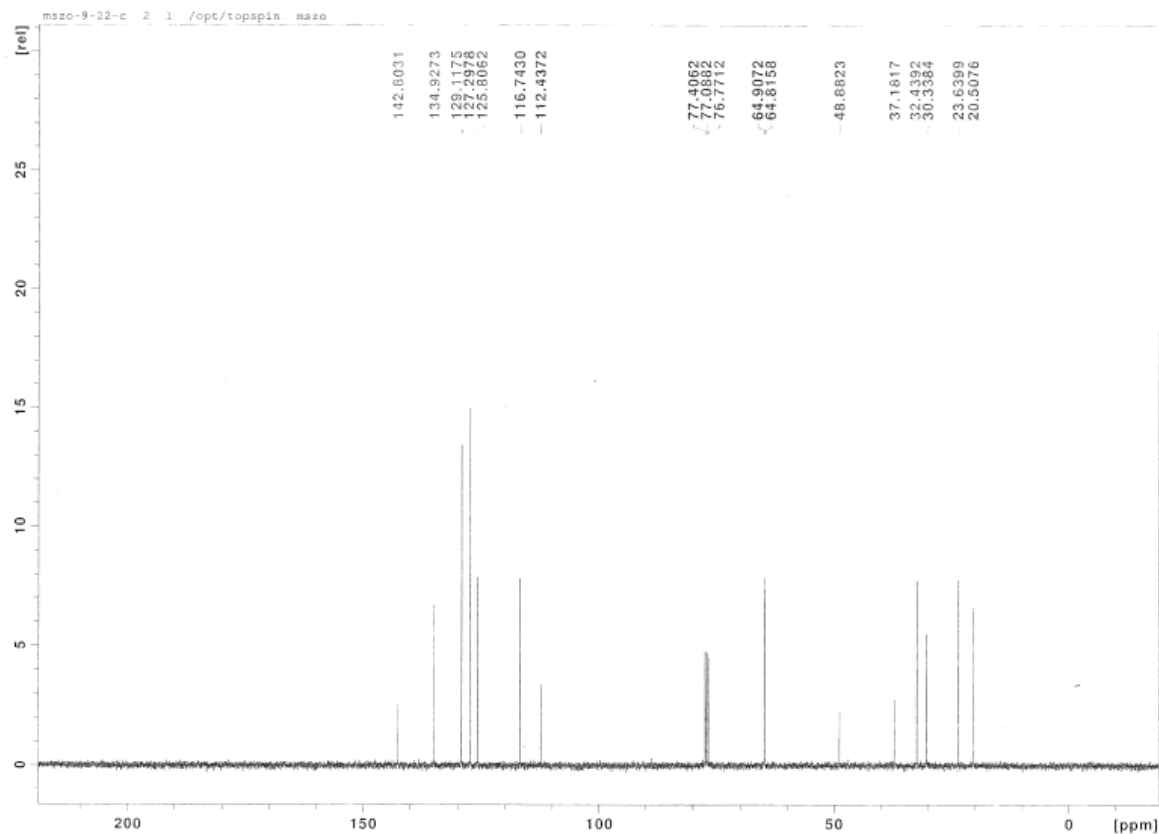

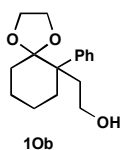

```

NAME      mszo-9-24-A
EXPNO     1
PROCNO    1
Date_     20091121
Time      10.10
INSTRUM   spect
PROBHD    5 mm QNP 1H/15
PULPROG   zg30
TD         65536
SOLVENT   CDCl3
NS         5
DS         2
SWH        8278.146 Hz
FIDRES     0.126314 Hz
AQ         3.9584243 sec
RG         4
DW         60.400 usec
DE         6.50 usec
TE         296.8 K
D1         1.00000000 sec
TDO        1
    
```

```

===== CHANNEL f1 =====
NUC1      1H
P1         8.00 usec
PL1        -5.00 dB
PL1W      39.71641159 W
SFO1      400.1324710 MHz
SI         32768
SF         400.1300000 MHz
WDW        EM
SSB         0
LB         0.30 Hz
GB         0
PC         1.40
    
```

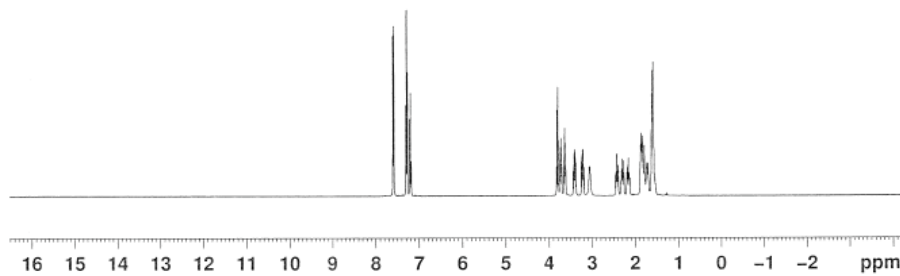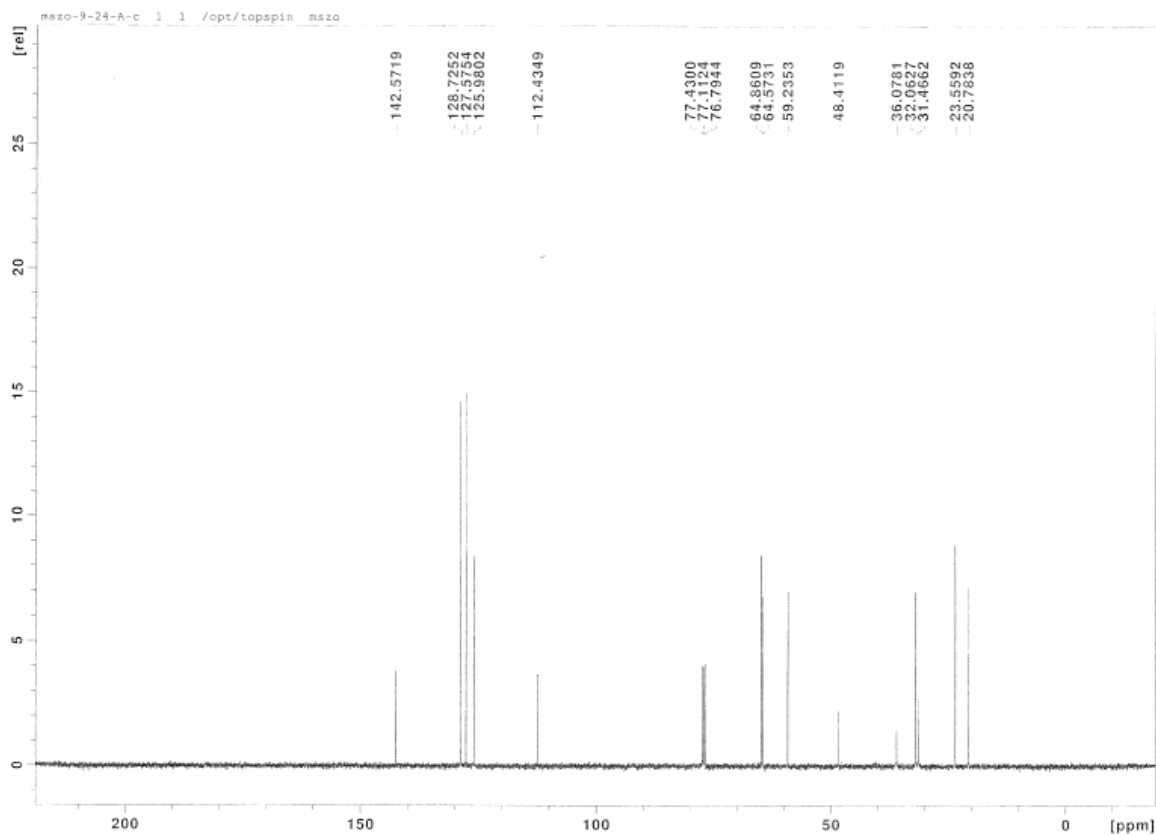

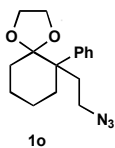

```

NAME          mszo-9-44
EXPNO         2
PROCNO        1
Date_         20091125
Time          12.30
INSTRUM       spect
PROBHD        5 mm QNP 1H/15
PULPROG       zg30
TD            65536
SOLVENT       CDCl3
NS            6
DS            2
SWH           8278.146 Hz
FIDRES        0.126314 Hz
AQ            3.9584243 sec
RG            4
DW            60.400 usec
DE            6.50 usec
TE            296.5 K
D1            1.00000000 sec
TD0           1
    
```

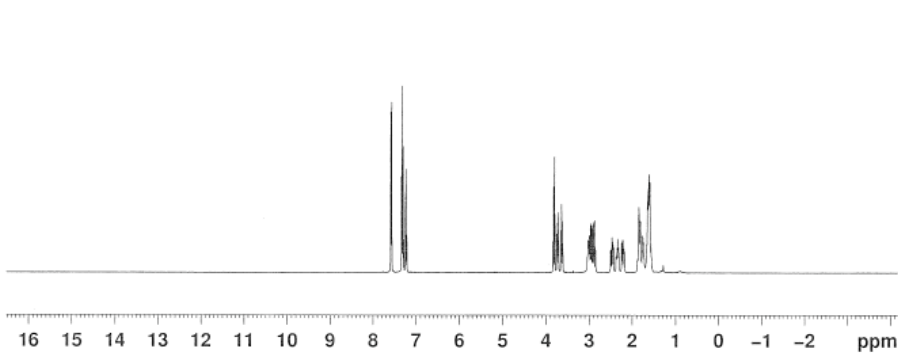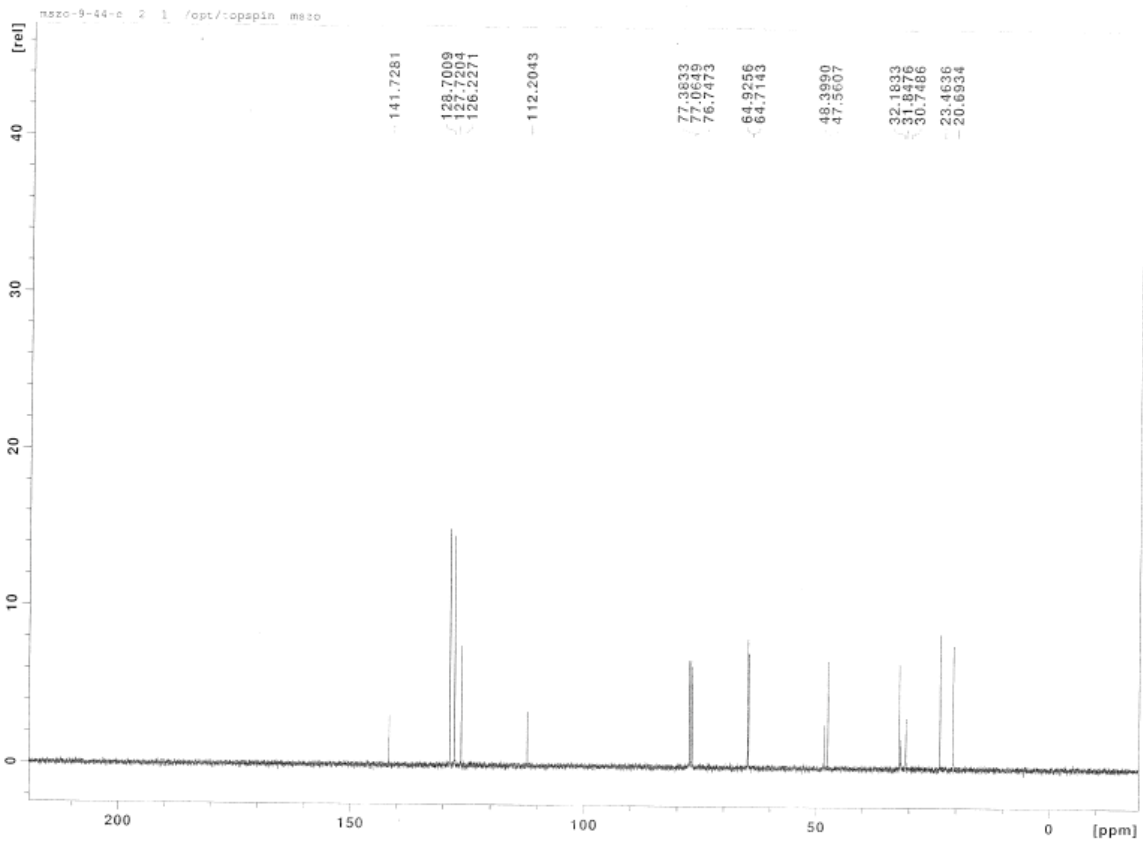

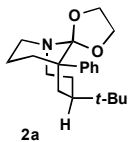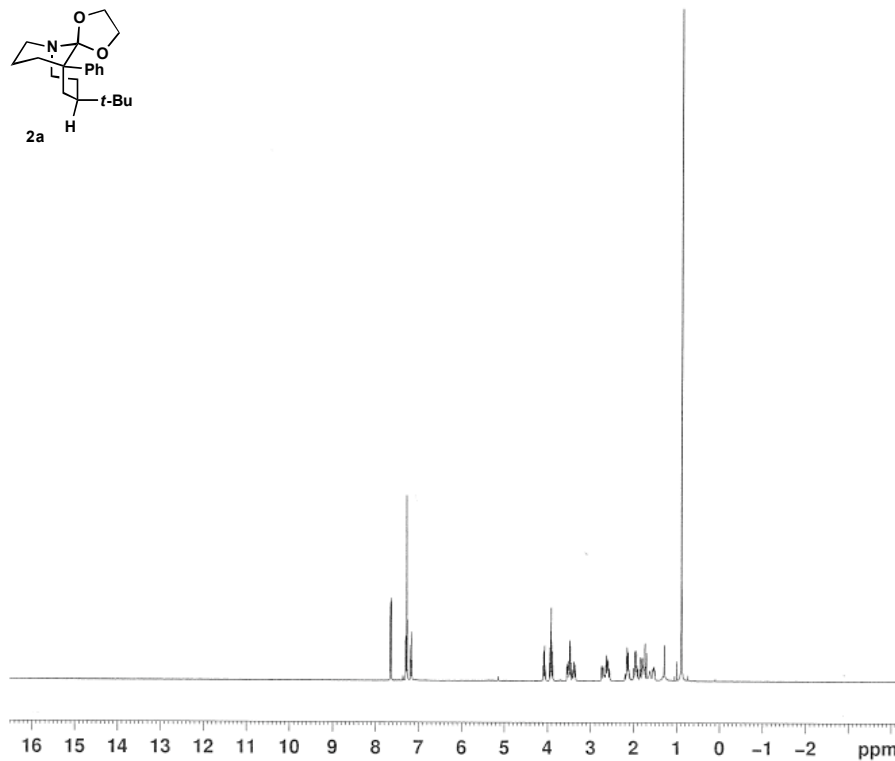

```

NAME          mszo-8-247-A
EXPNO         1
PROCNO        1
Date_         20091027
Time          19.13
INSTRUM       spect
PROBHD        5 mm QNP 1H/13
PULPROG       zg30
TD            65536
SOLVENT       CDCl3
NS            16
DS            2
SWH           8278.146 Hz
FIDRES        0.126314 Hz
AQ            3.9584243 sec
RG            4
DW            60.400 usec
DE            6.50 usec
TE            296.8 K
D1            1.0000000 sec
TDO           1

----- CHANNEL f1 -----
NUC1          1H
P1            8.00 usec
PL1          -5.00 dB
PL1W         39.71641159 W
SFO1         400.1324710 MHz
SI           32768
SF           400.1300000 MHz
WDW          EM
SSB          0
LB           0.30 Hz
GB           0
PC           1.00
    
```

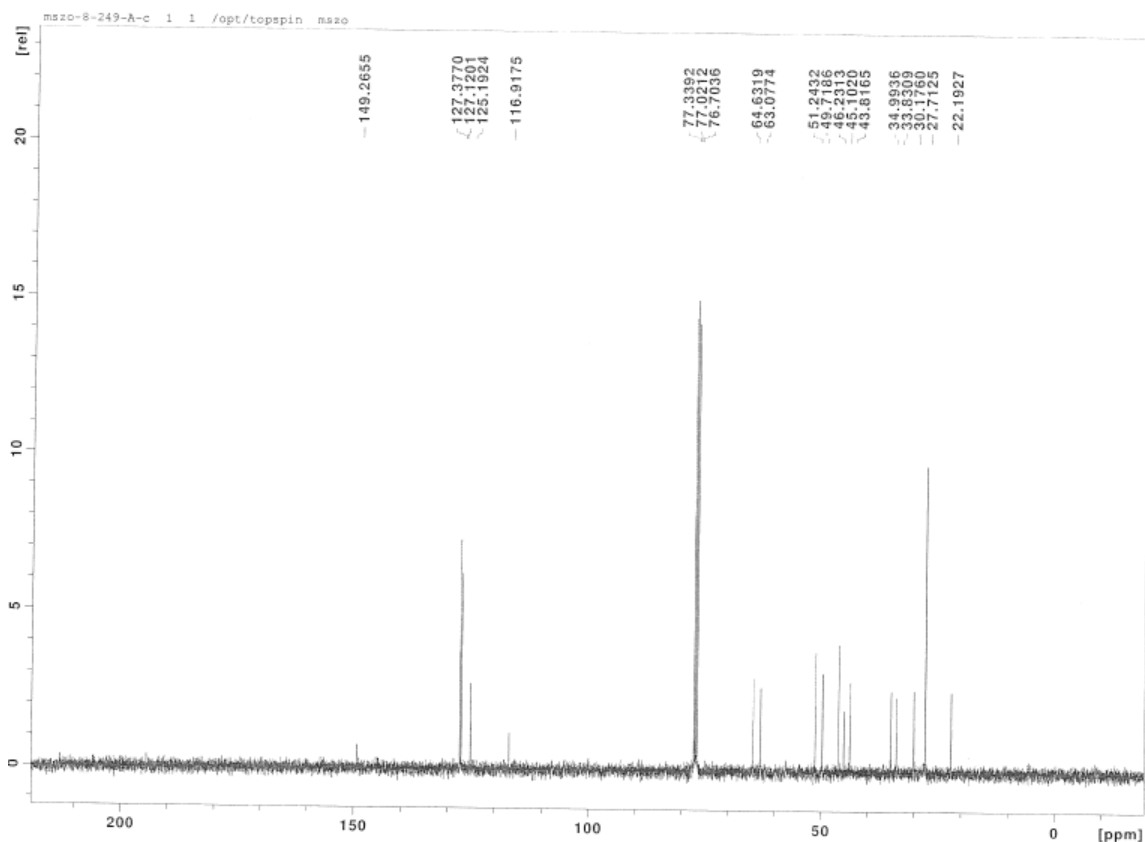



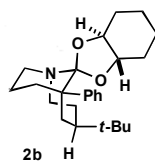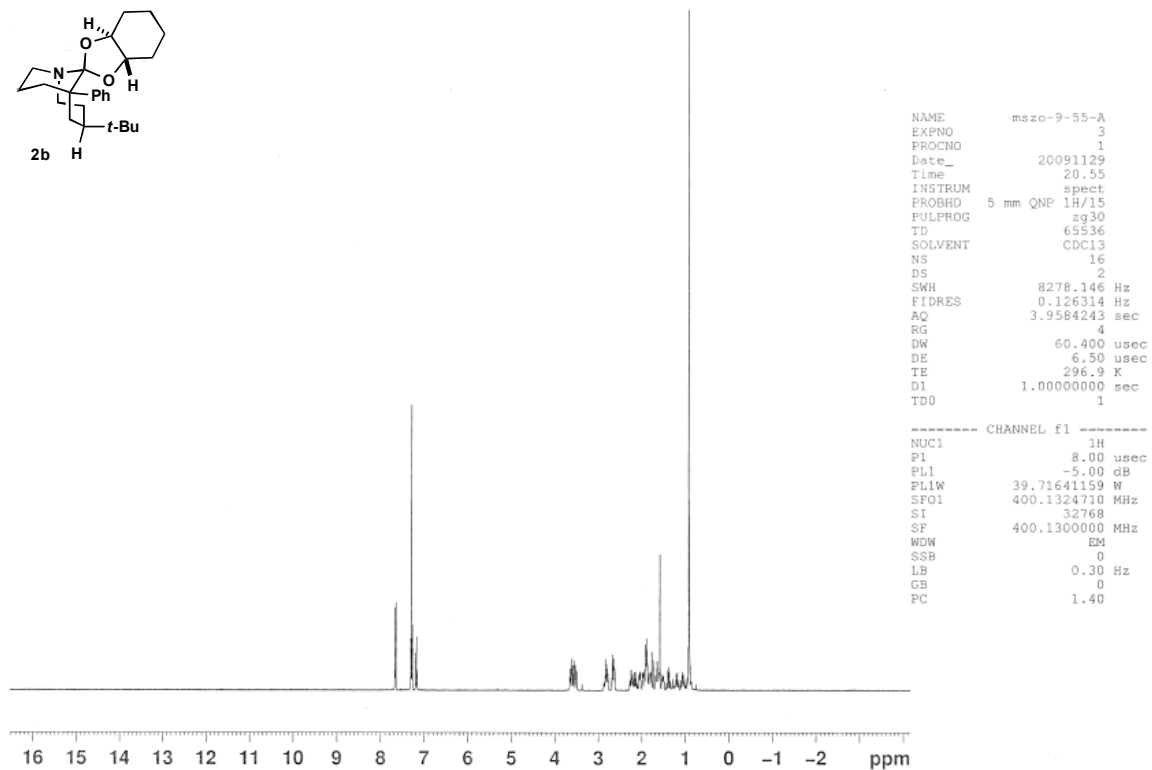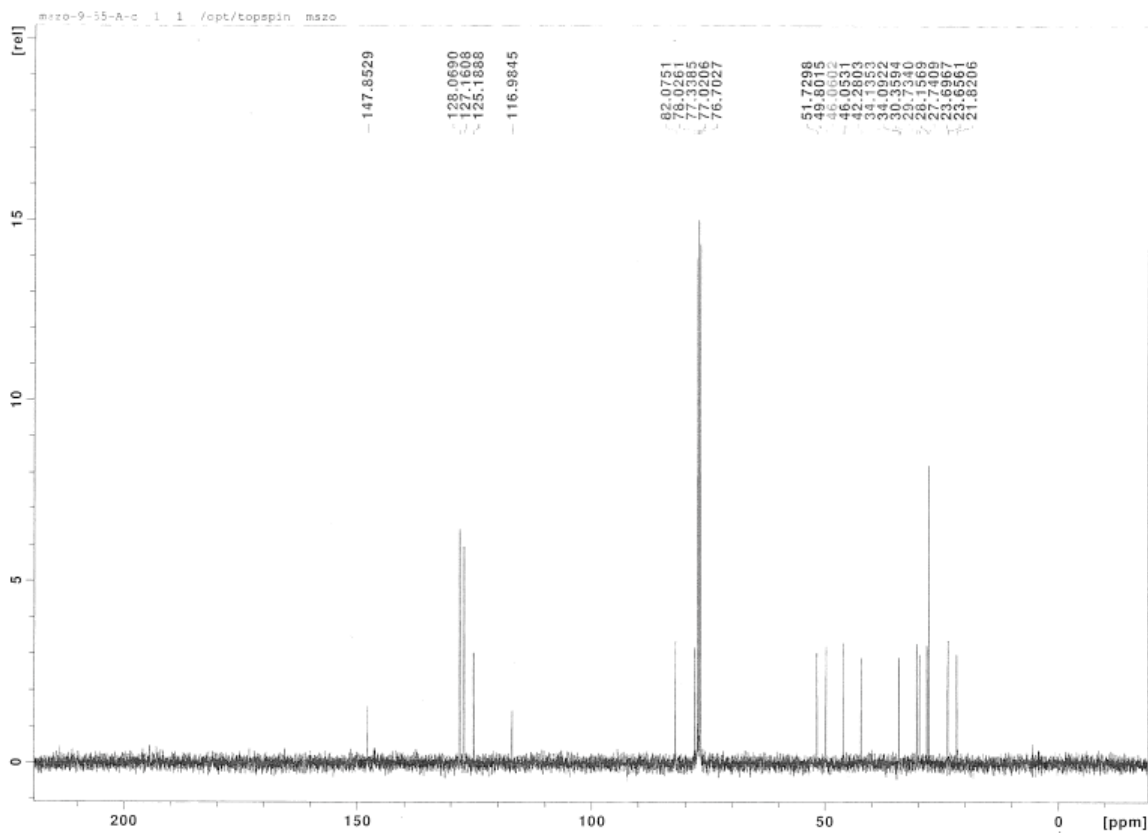

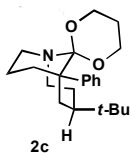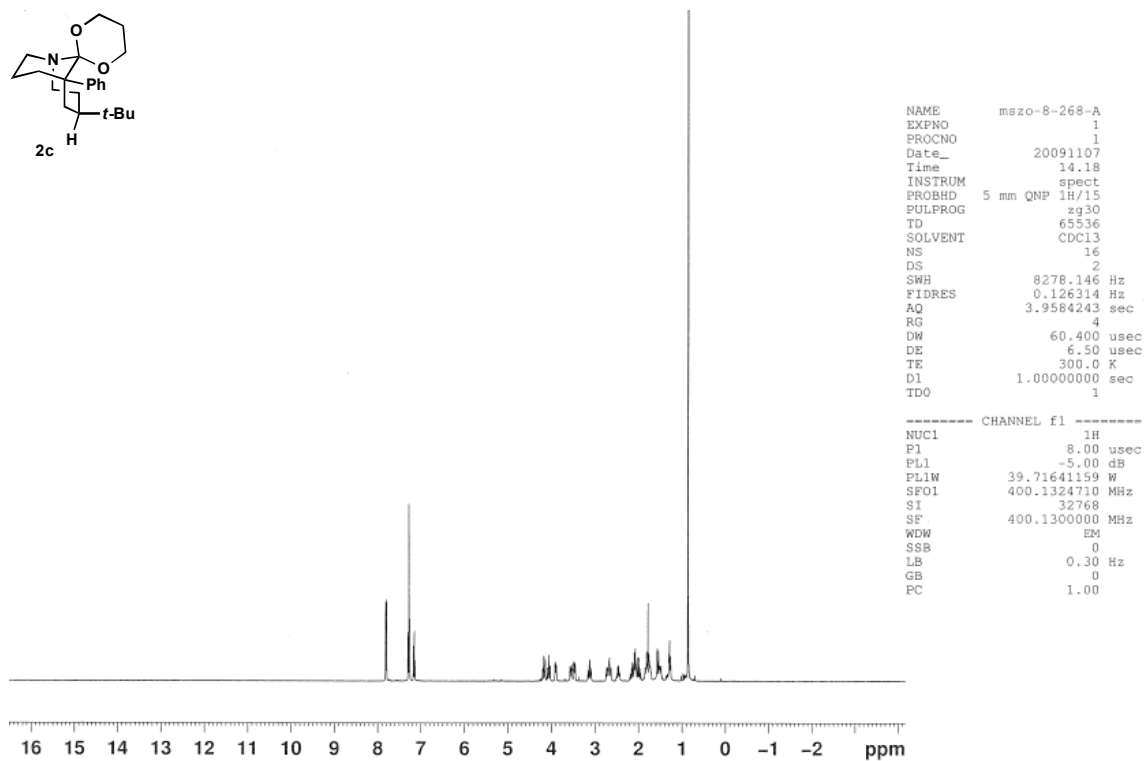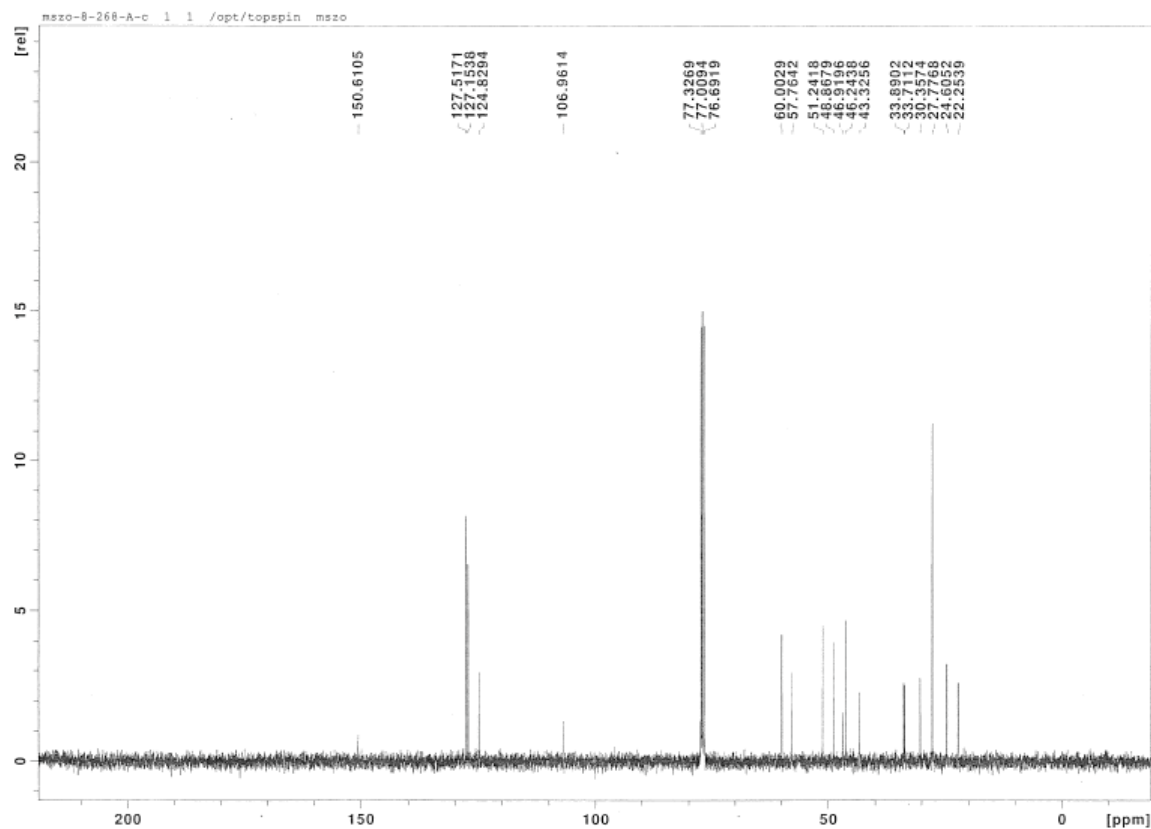

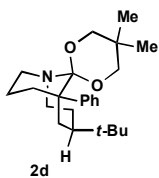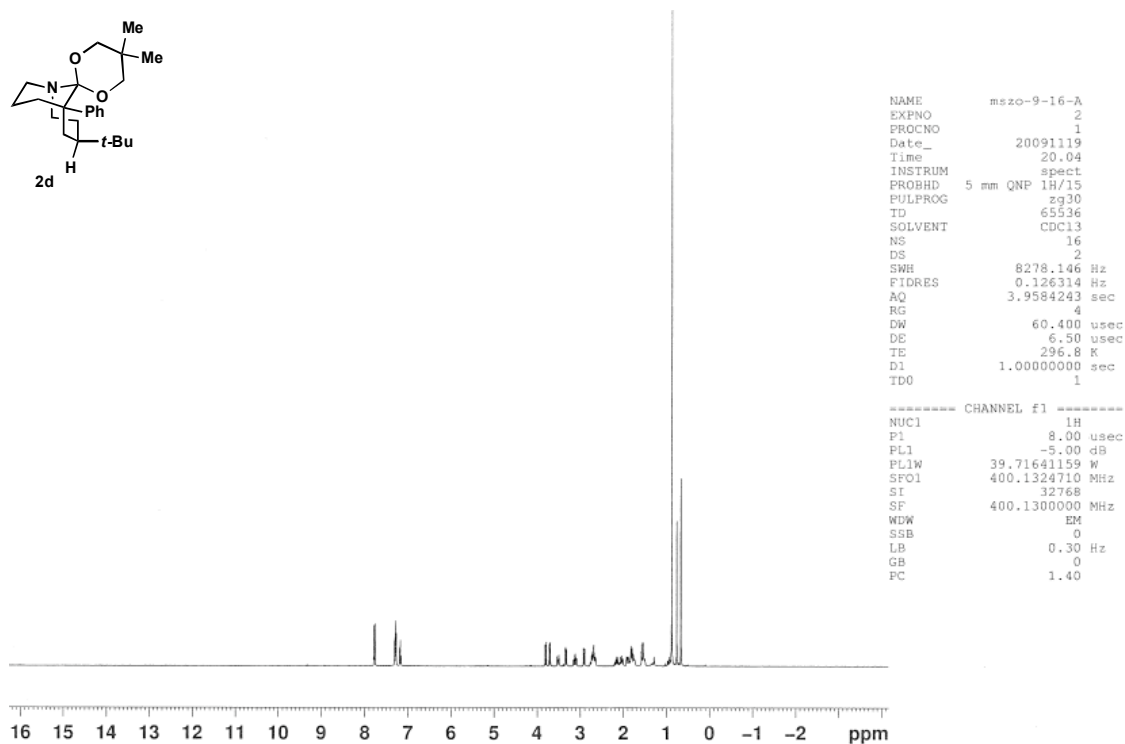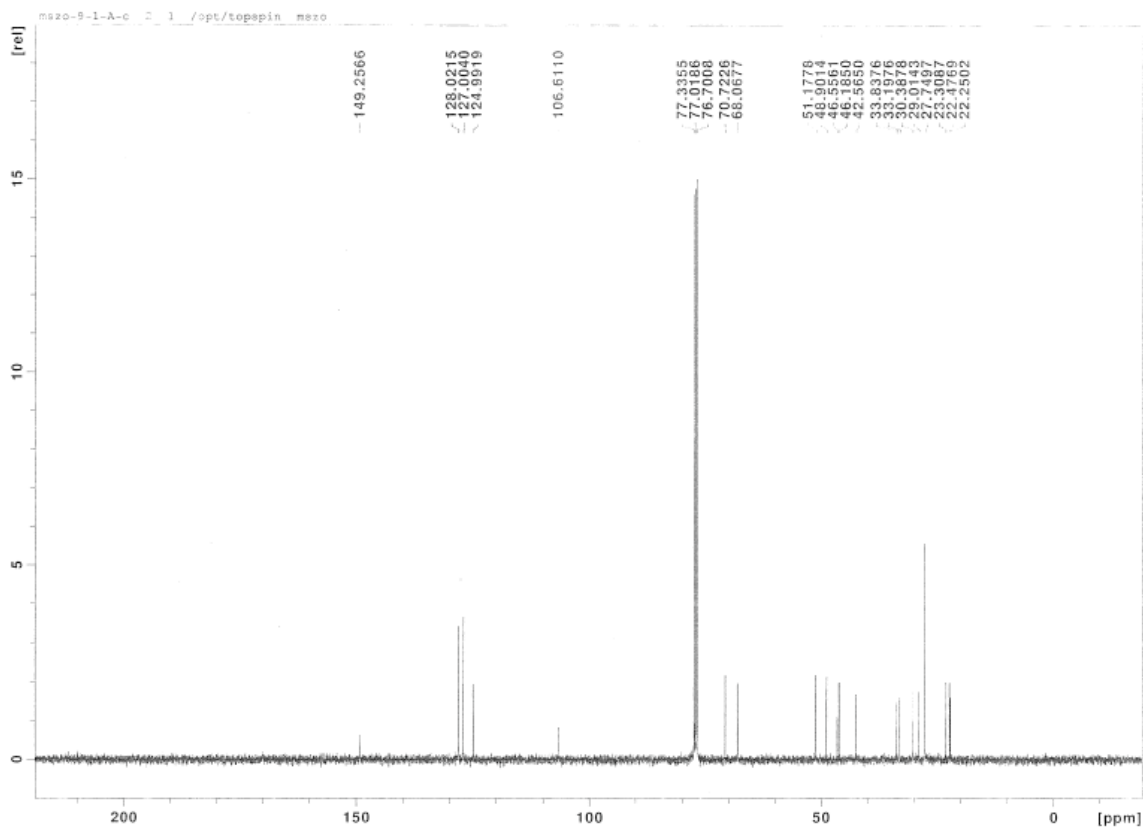

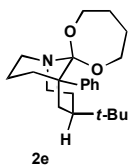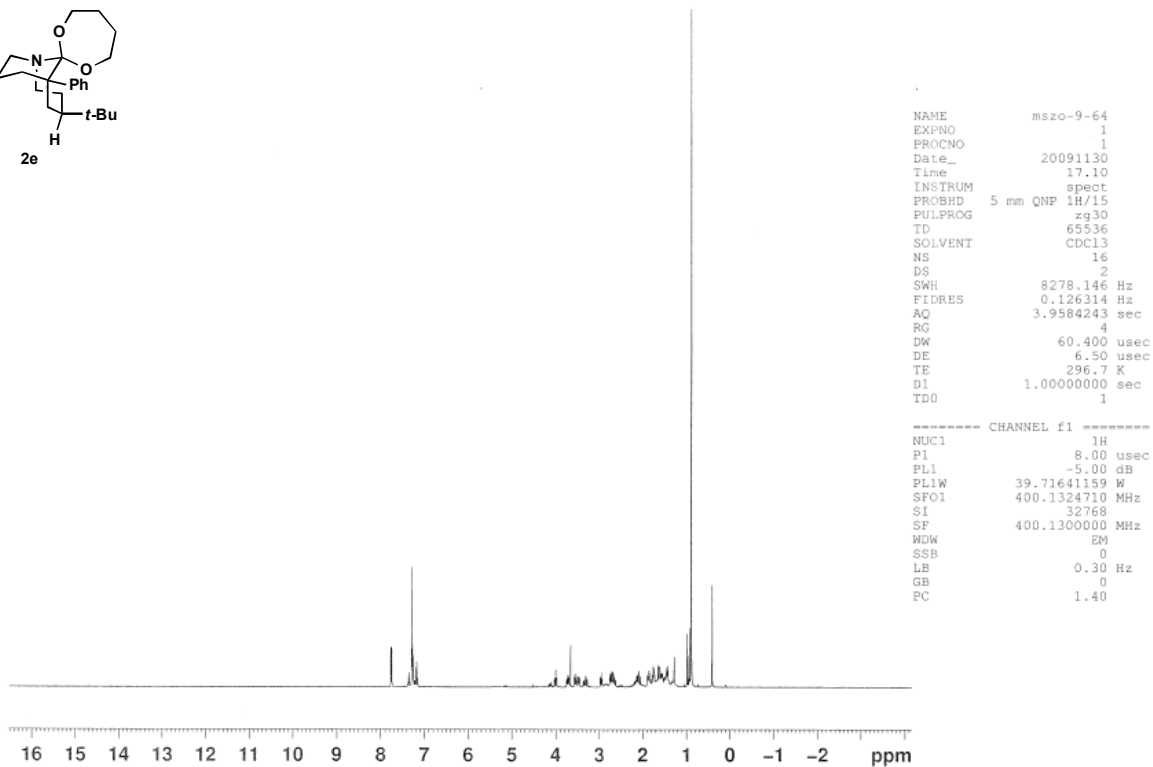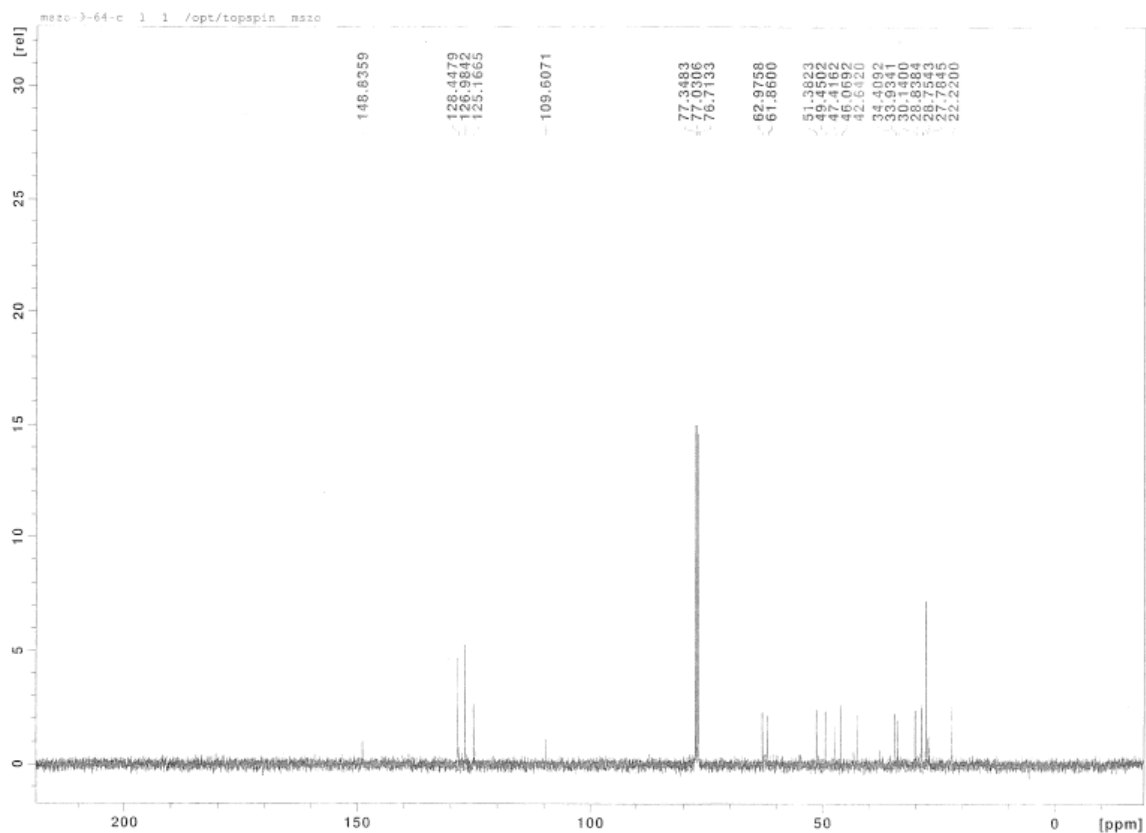

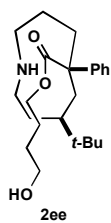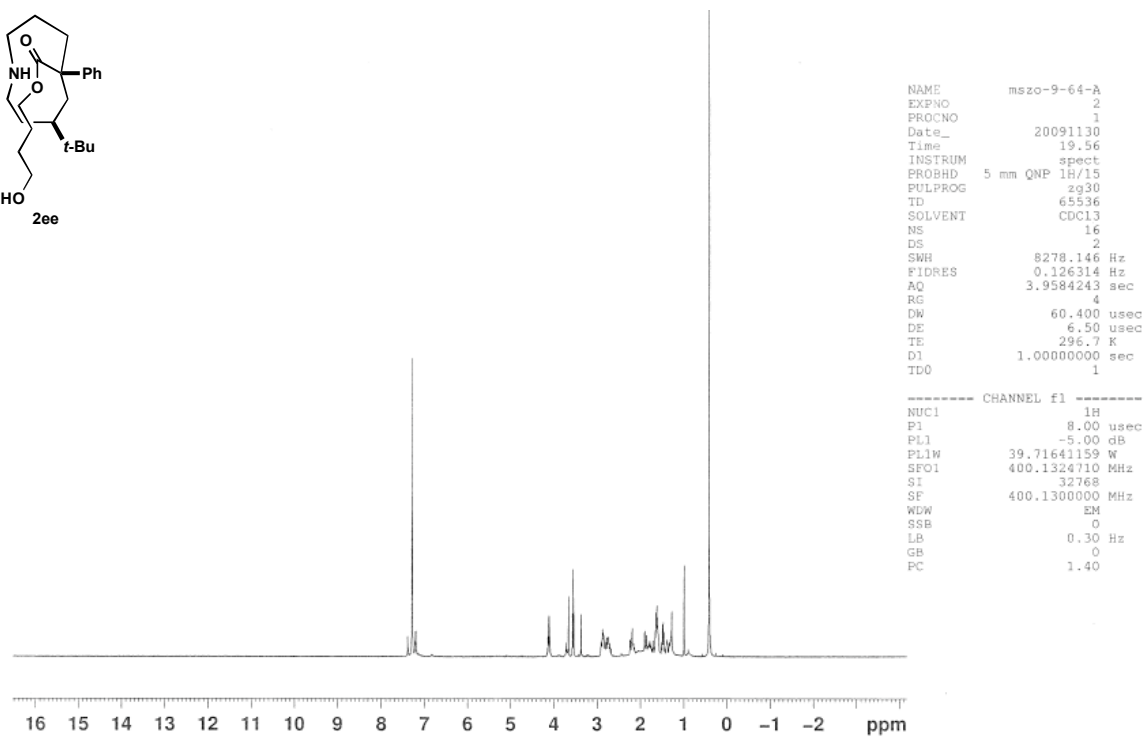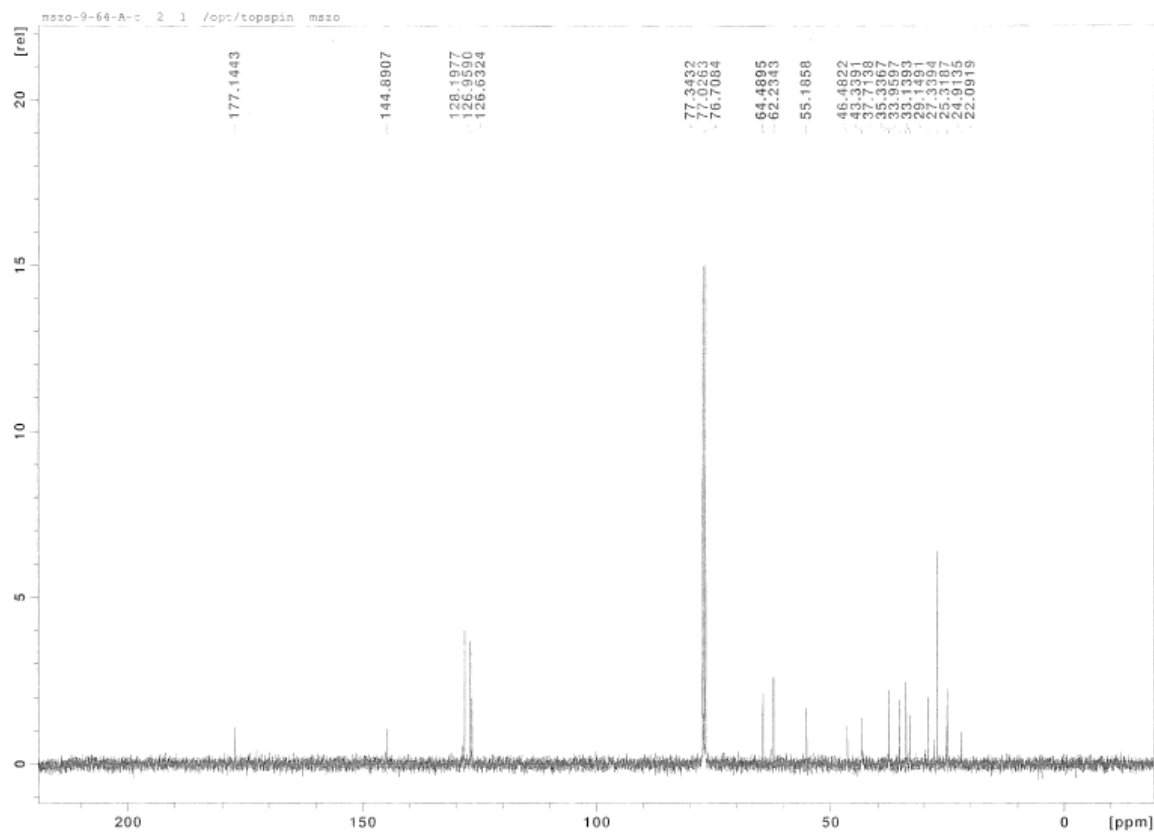

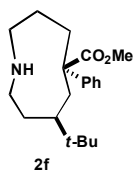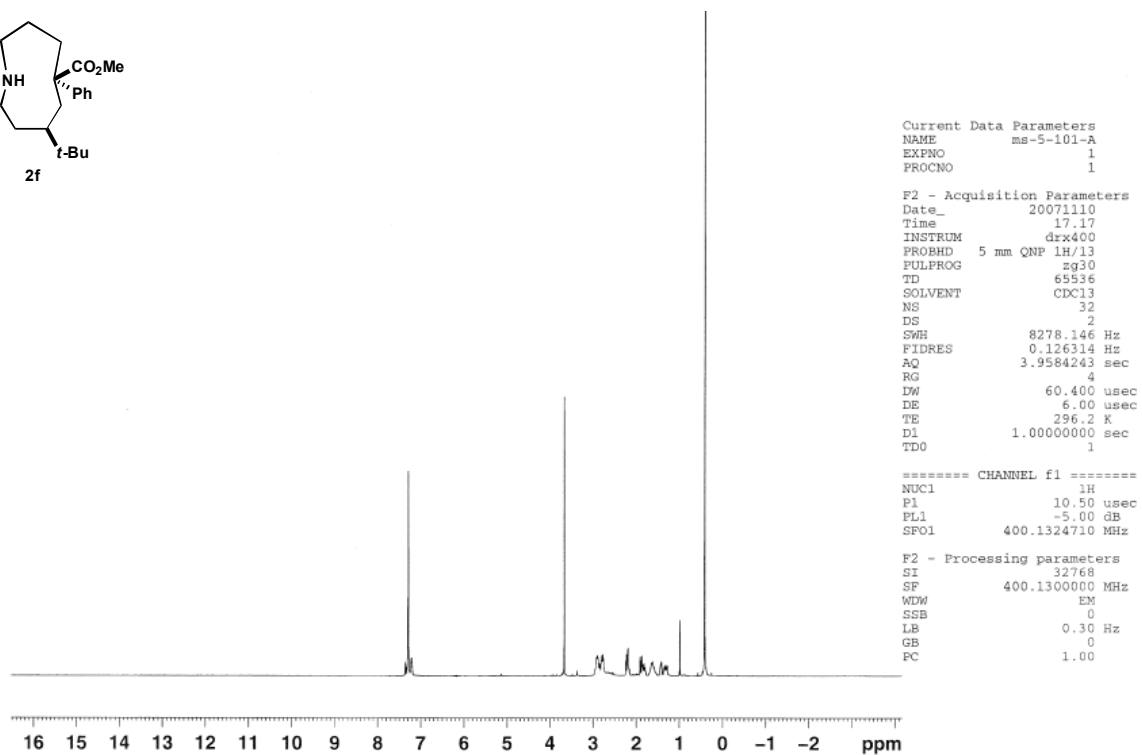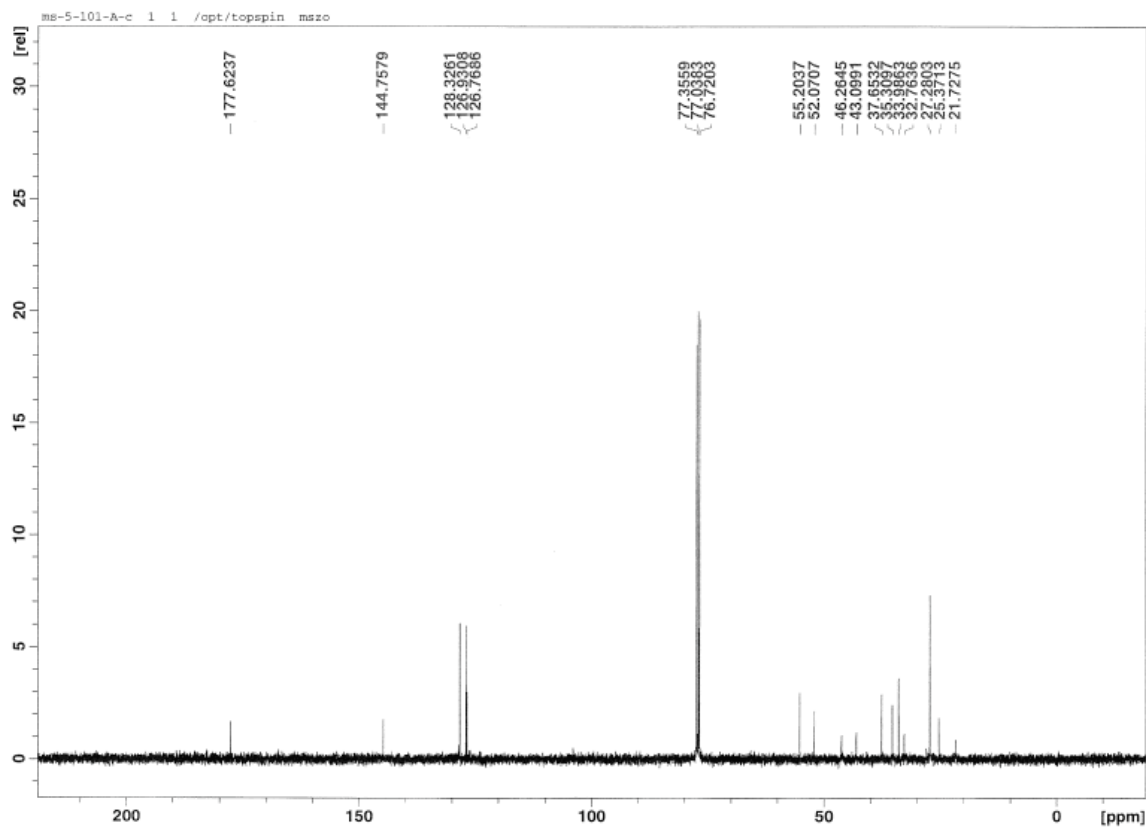

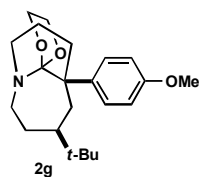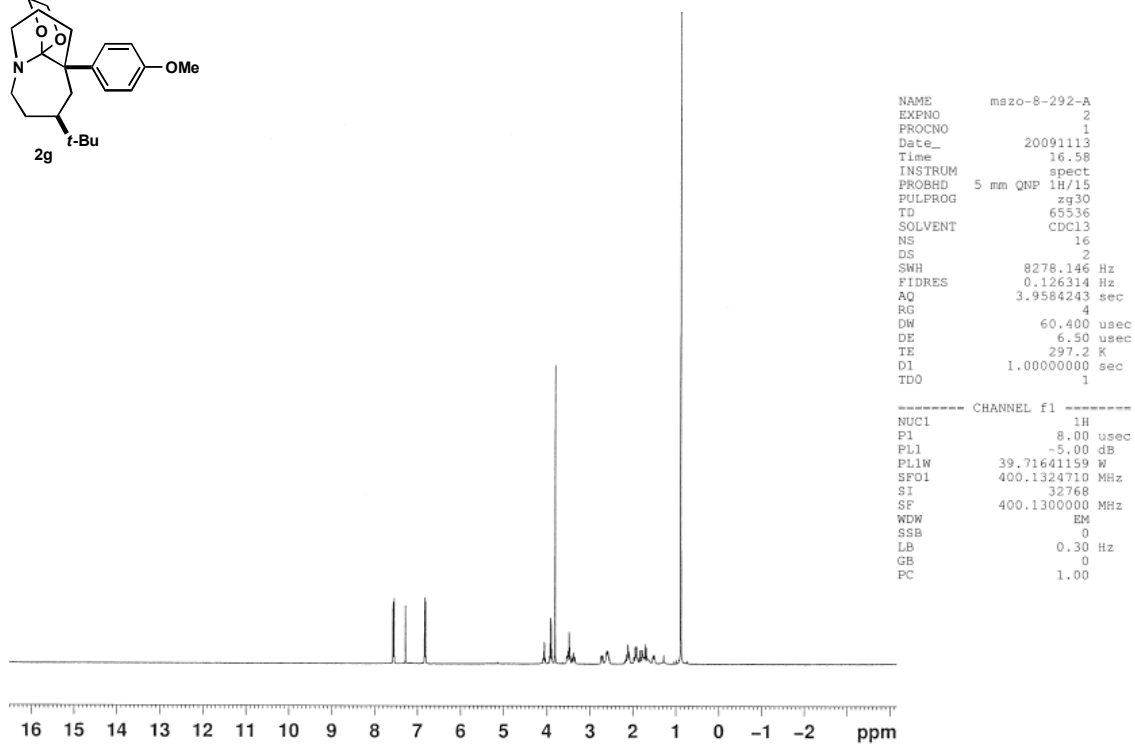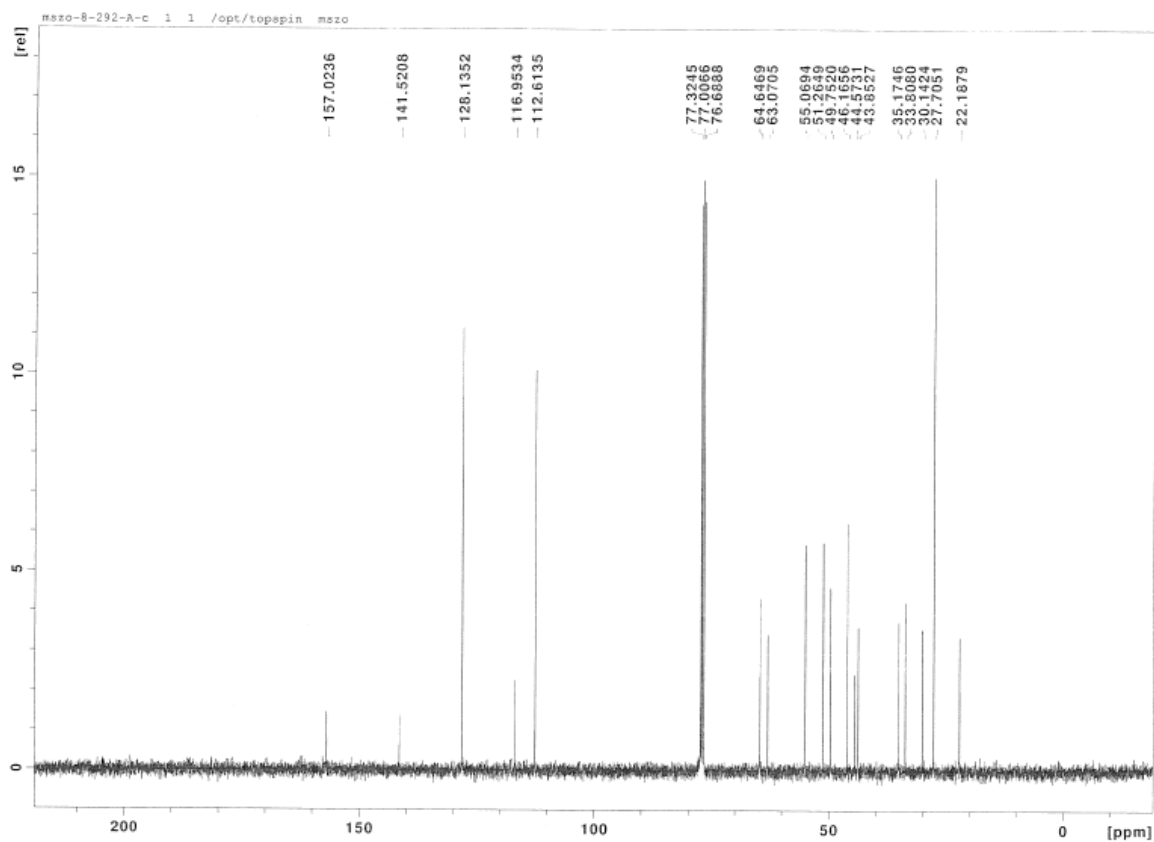

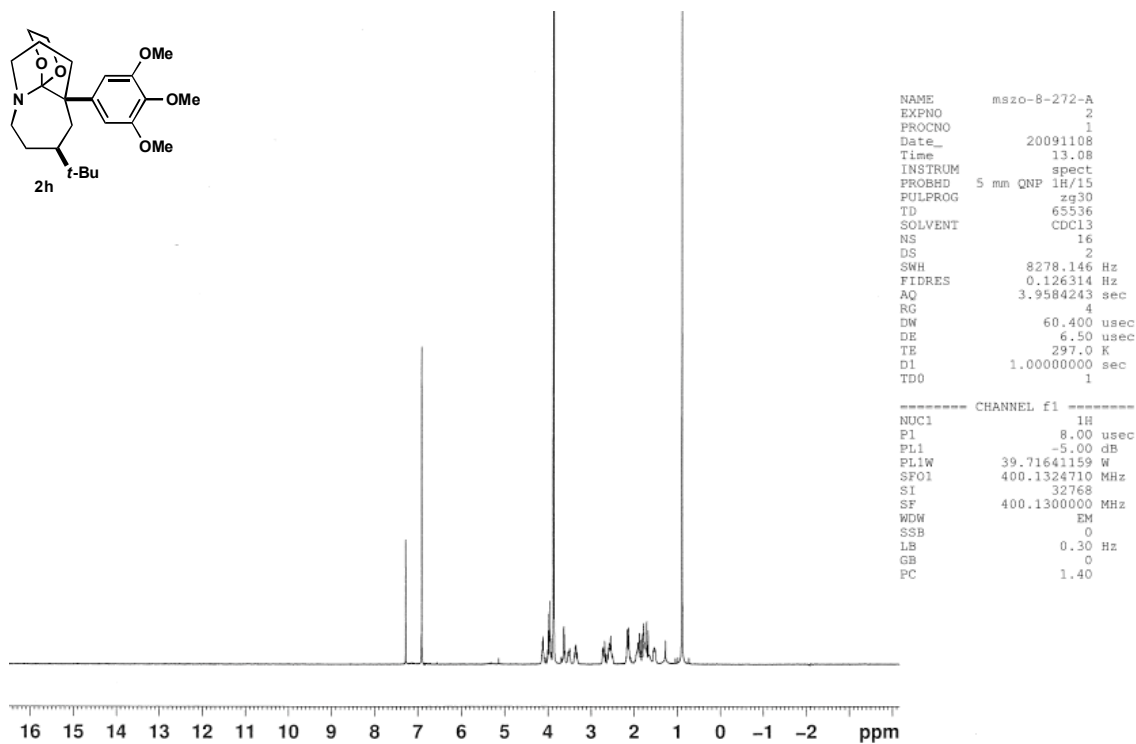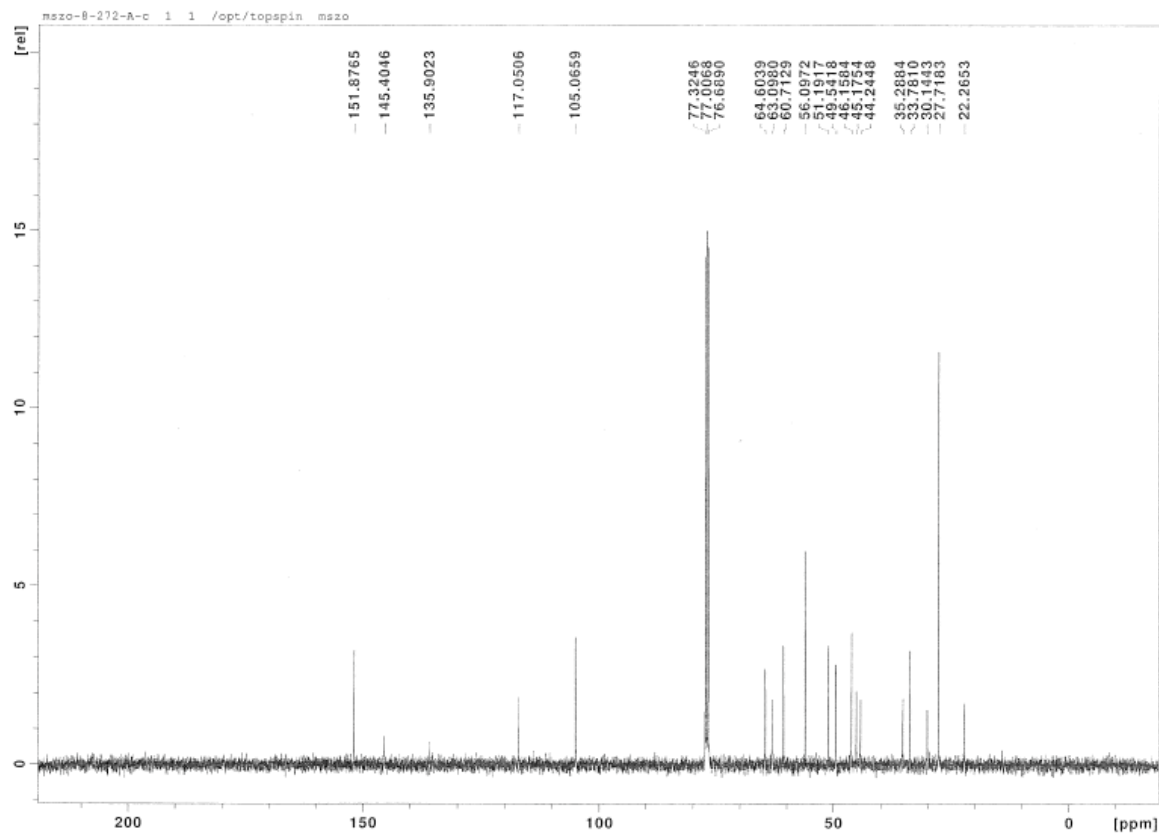



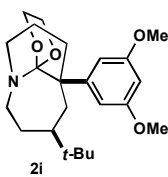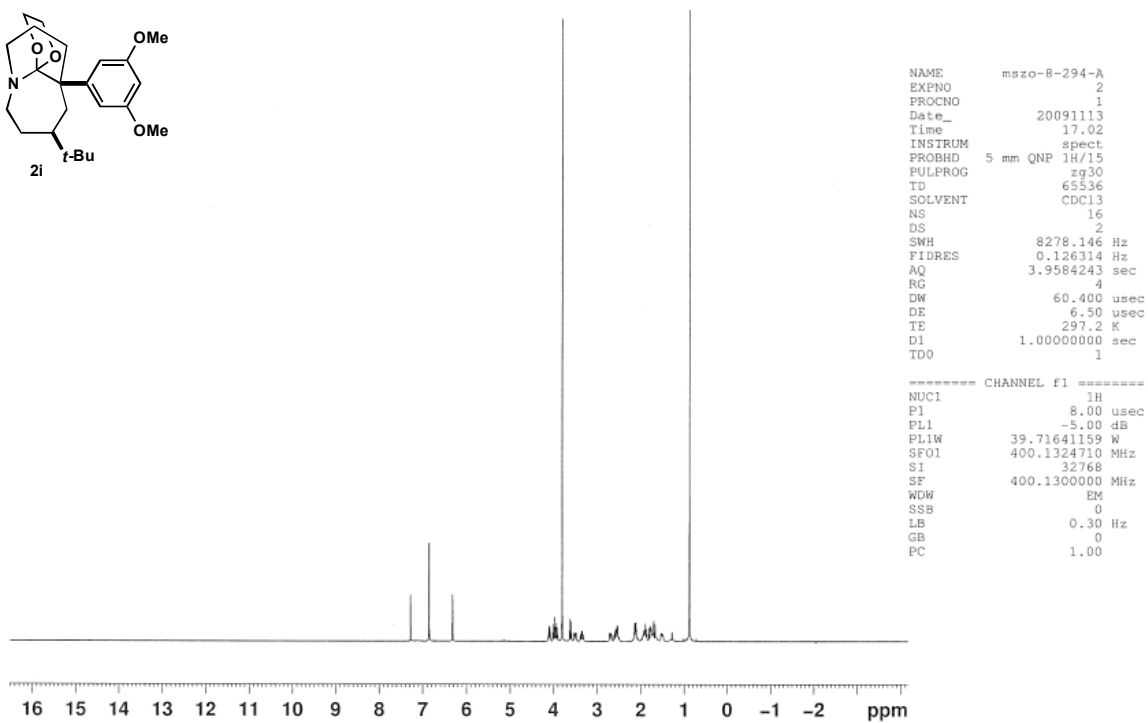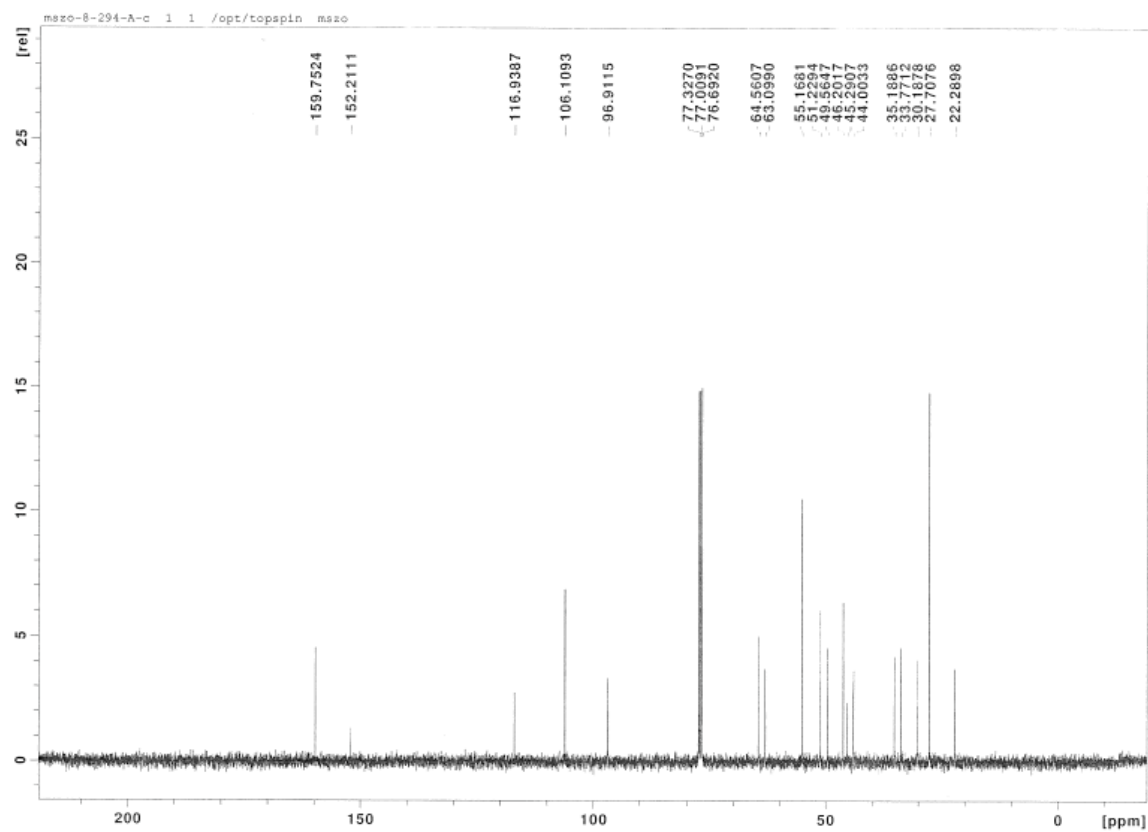

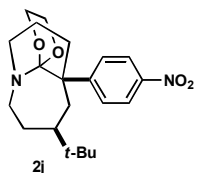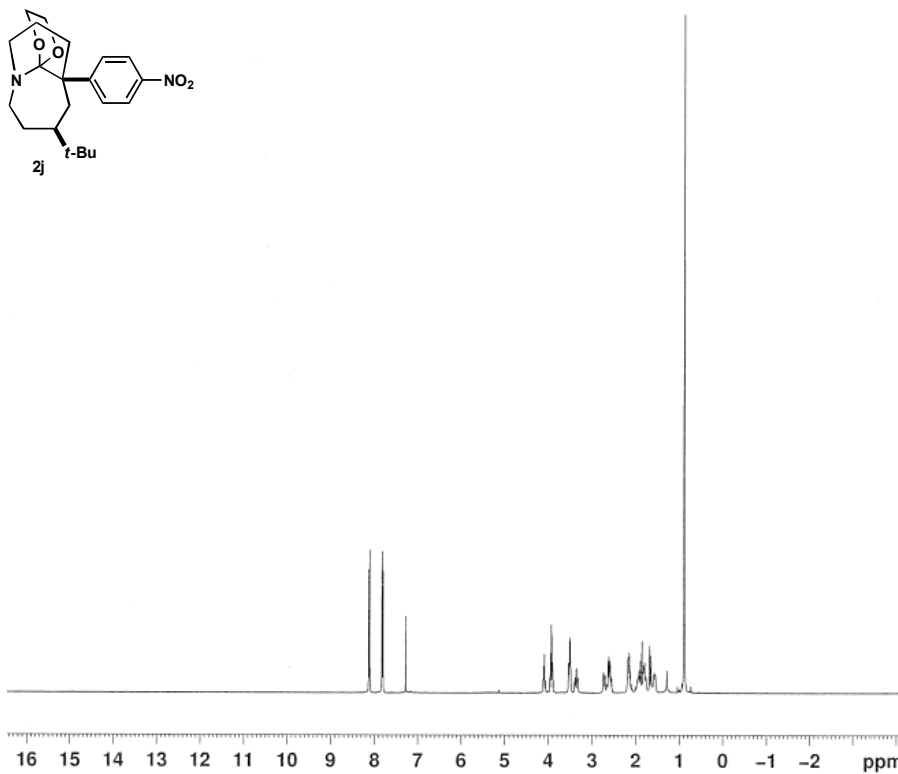

```

NAME      mszo-8-280-A
EXPNO     2
PROCNO    1
Date_     20091110
Time      16.34
INSTRUM   spect
PROBHD    5 mm QNP 1H/15
PULPROG   zg30
TD         65536
SOLVENT   CDCl3
NS         16
DS         2
SWH       8278.146 Hz
FIDRES    0.126314 Hz
AQ        3.9584243 sec
RG         4
DW         60.400 usec
DE         6.50 usec
TE         300.0 K
D1         1.00000000 sec
TDO        1
    
```

```

===== CHANNEL f1 =====
NUC1      1H
P1        8.00 usec
PL1       -5.00 dB
PL1W     39.71641159 W
SFO1     400.1324710 MHz
SI        32768
SF        400.1300000 MHz
WDW       EM
SSB       0
LB        0.30 Hz
GB        0
PC        1.40
    
```

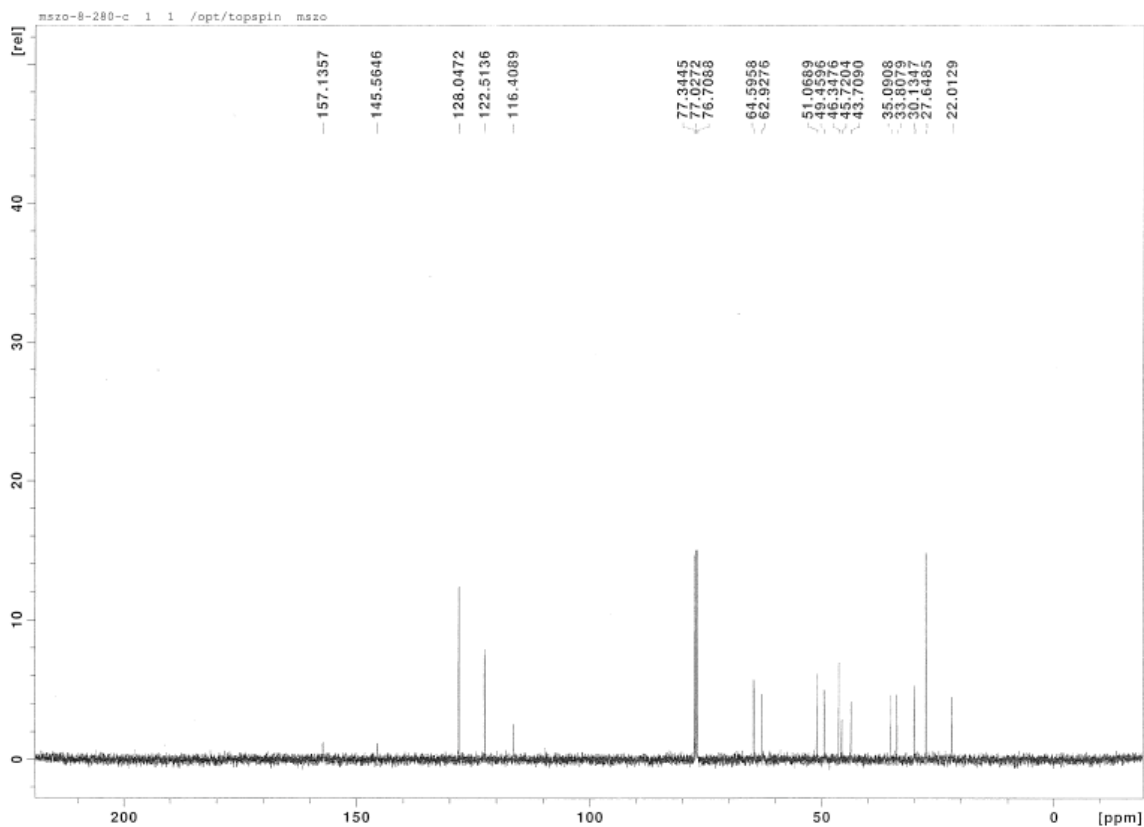

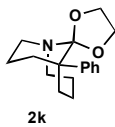

```

NAME          mszo-9-12-A
EXPNO         2
PROCNO        1
Date_         20091118
Time          21.07
INSTRUM       spect
PROBHD        5 mm QNP 1H/15
PULPROG       zg30
TD            65536
SOLVENT       CDCl3
NS            16
DS            2
SWH           8278.146 Hz
FIDRES        0.126314 Hz
AQ            3.9584243 sec
RG            4
DW            60.400 usec
DE            6.50 usec
TE            296.7 K
D1            1.00000000 sec
TDD           1
----- CHANNEL f1 -----
NUC1          1H
P1            8.00 usec
PL1           -5.00 dB
PL1W          39.71641159 W
SF01          400.1324710 MHz
SI            32768
SF            400.1300000 MHz
WDW           EM
SSB           0
LB            0.30 Hz
GB            0
PC            1.00
    
```

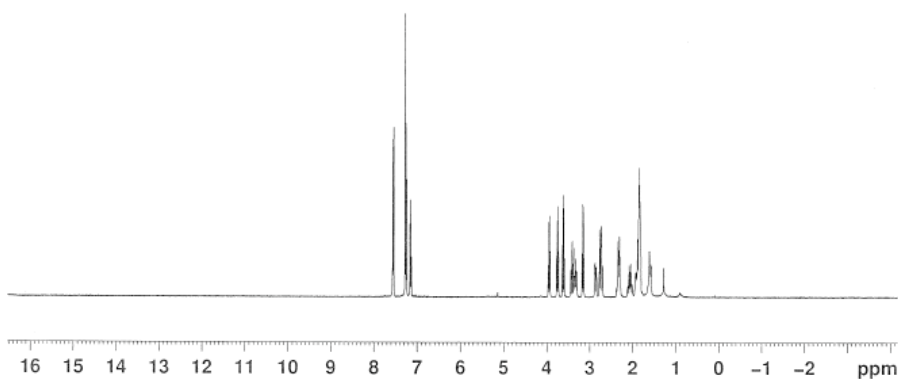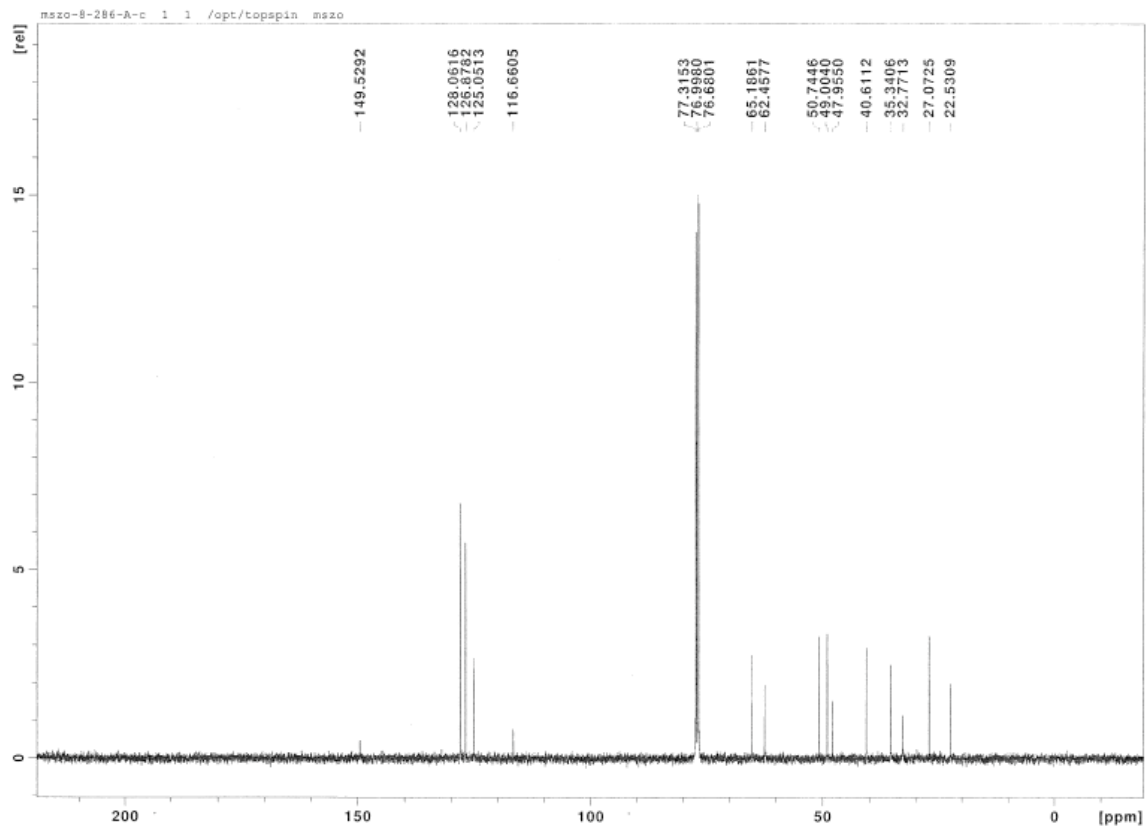

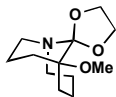

2l

```

NAME      mszo-8-283-A
EXPNO     1
PROCNO    1
Date_     20091109
Time      21.48
INSTRUM   spect
PROBHD    5 mm QNP 1H/15
PULPROG   zg30
TD        65536
SOLVENT   CDCl3
NS        16
DS        2
SWH       8278.146 Hz
FIDRES    0.126314 Hz
AQ        3.9584243 se
RG        4
DM        60.400 us
DE        6.50 us
TE        297.6 K
D1        1.0000000 se
TDO       1
    
```

```

===== CHANNEL f1 =====
NUC1      1H
P1        8.00 us
PL1       -5.00 dB
PL1W      39.71641159 W
SFO1      400.1324710 MH
SI        32768
SF        400.1300000 MH
WDW       EM
SSB       0
LB        0.30 Hz
GB        0
PC        1.00
    
```

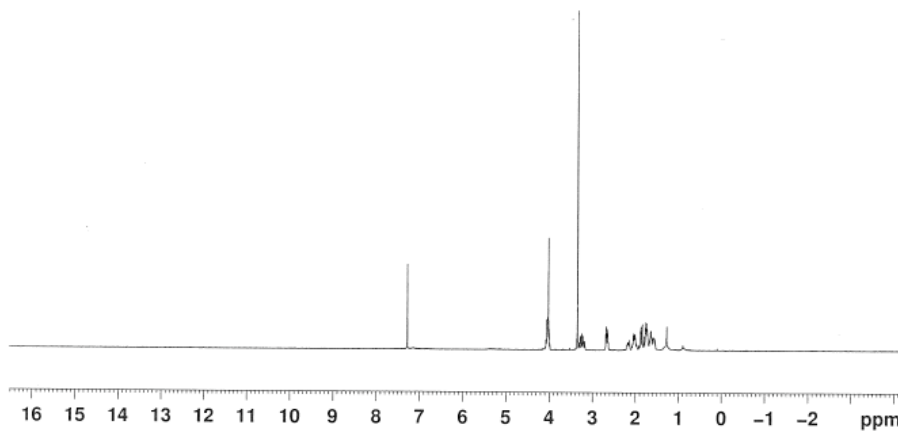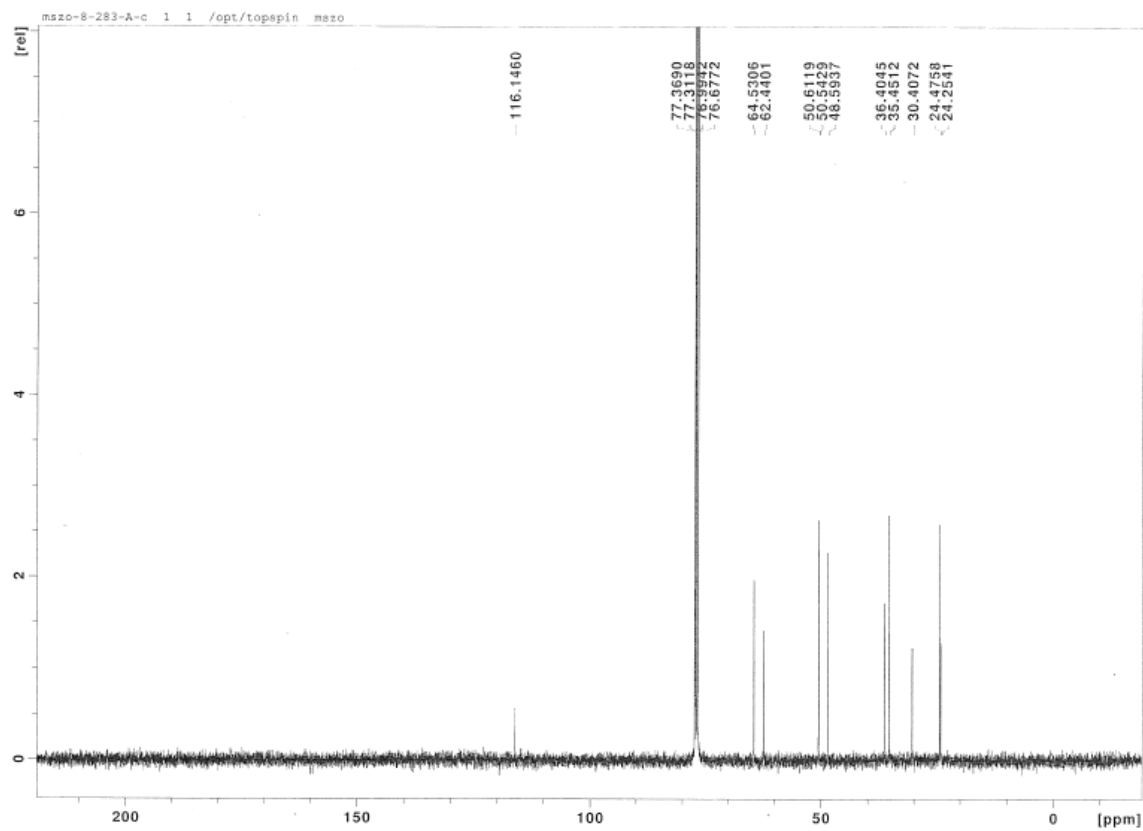

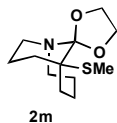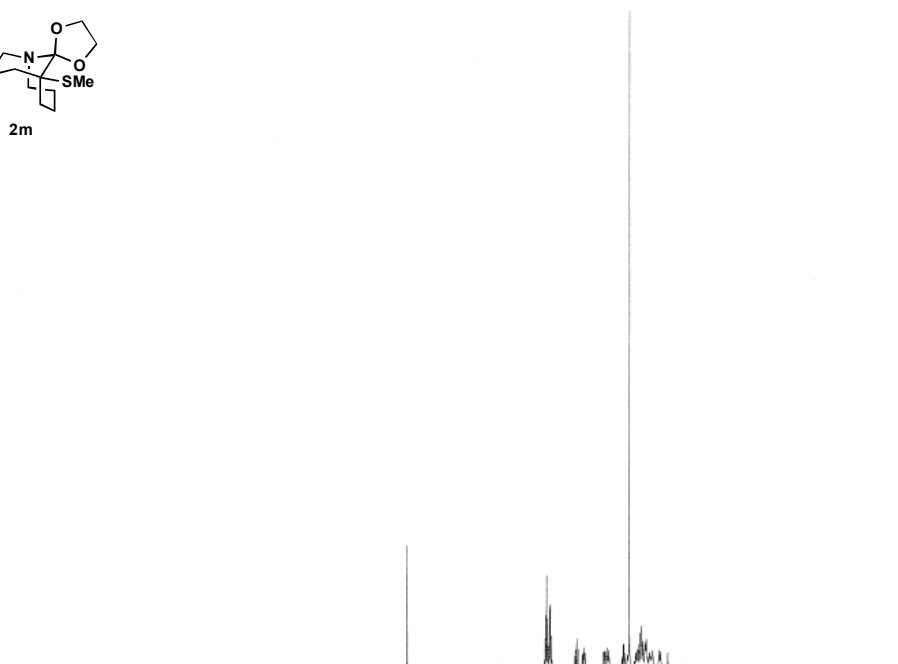

```

NAME          mszo-9-2-A
EXPNO         1
PROCNO        1
Date_         20091116
Time         23.01
INSTRUM       spect
PROBHD        5 mm QNP 1H/15
PULPROG       zg30
TD            65536
SOLVENT       CDCl3
NS            16
DS            2
SWH           8278.146 Hz
FIDRES        0.126314 Hz
AQ            3.9584243 sec
RG            4
DW            60.400 usec
DE            6.50 usec
TE            300.0 K
D1            1.00000000 sec
TD0           1

----- CHANNEL f1 -----
NUC1          1H
P1            8.00 usec
PL1          -5.00 dB
PL1W         39.71641159 W
SFO1         400.1324710 MHz
SI           32768
SF           400.1300000 MHz
WDW          EM
SSB          0
LB           0.30 Hz
GB           0
PC           1.00
    
```

16 15 14 13 12 11 10 9 8 7 6 5 4 3 2 1 0 -1 -2 ppm

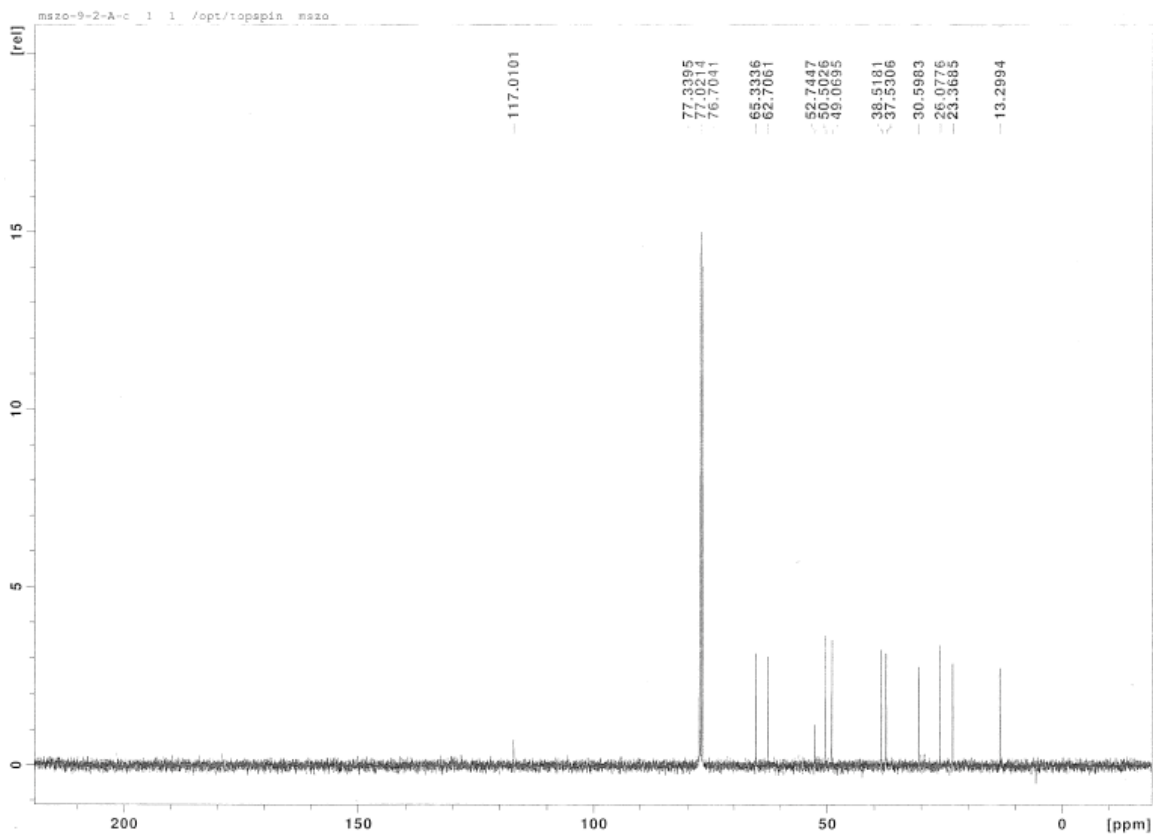

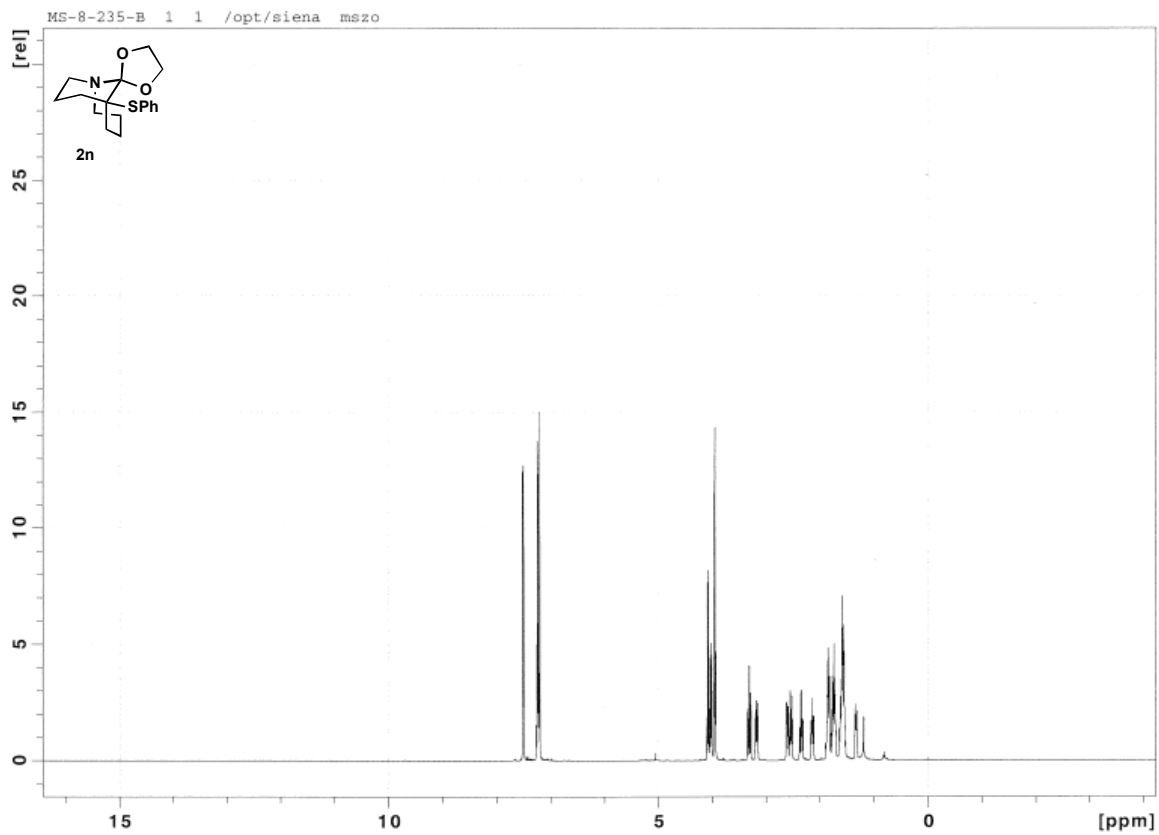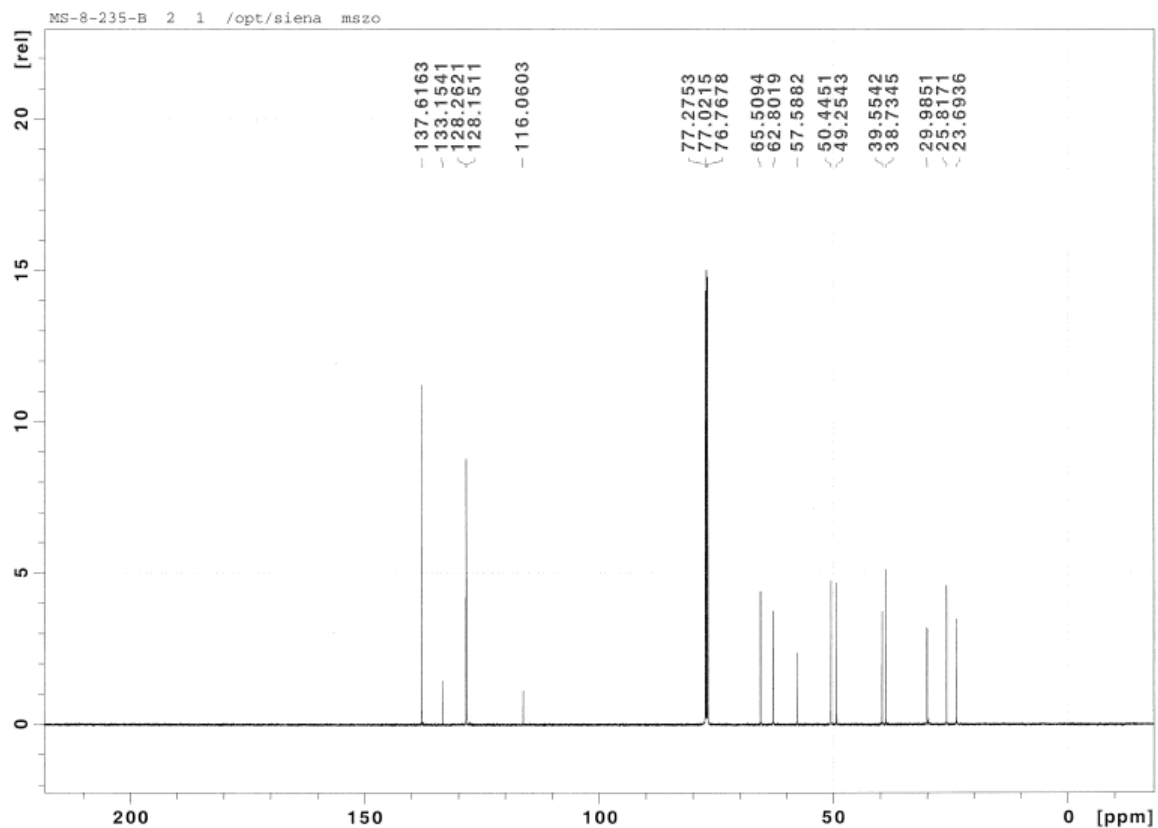

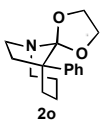

```

NAME      mazo-9-36-A
EXPNO    2
PROCNO    1
Date_     20091122
Time      19.48
INSTRUM   spect
PROBHD    5 mm QNP 1H/15
PULPROG   zg30
TD        65536
SOLVENT   CDCl3
NS        16
DS        2
SWH       8278.146 Hz
FIDRES    0.126314 Hz
AQ        3.9584243 sec
RG        4
DW        60.400 usec
DE        6.50 usec
TE        296.8 K
D1        1.0000000 sec
TD0       1
    
```

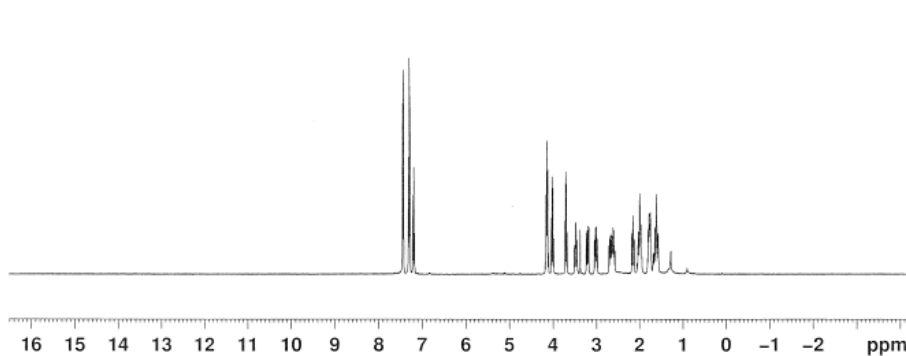

```

----- CHANNEL f1 -----
NUC1      1H
P1        8.00 usec
PL1       -5.00 dB
PL1W      39.71641159 W
SFO1      400.1324710 MHz
SI        32768
SF        400.1300000 MHz
WDW       EM
SSB       0
LB        0.30 Hz
GB        0
PC        1.40
    
```

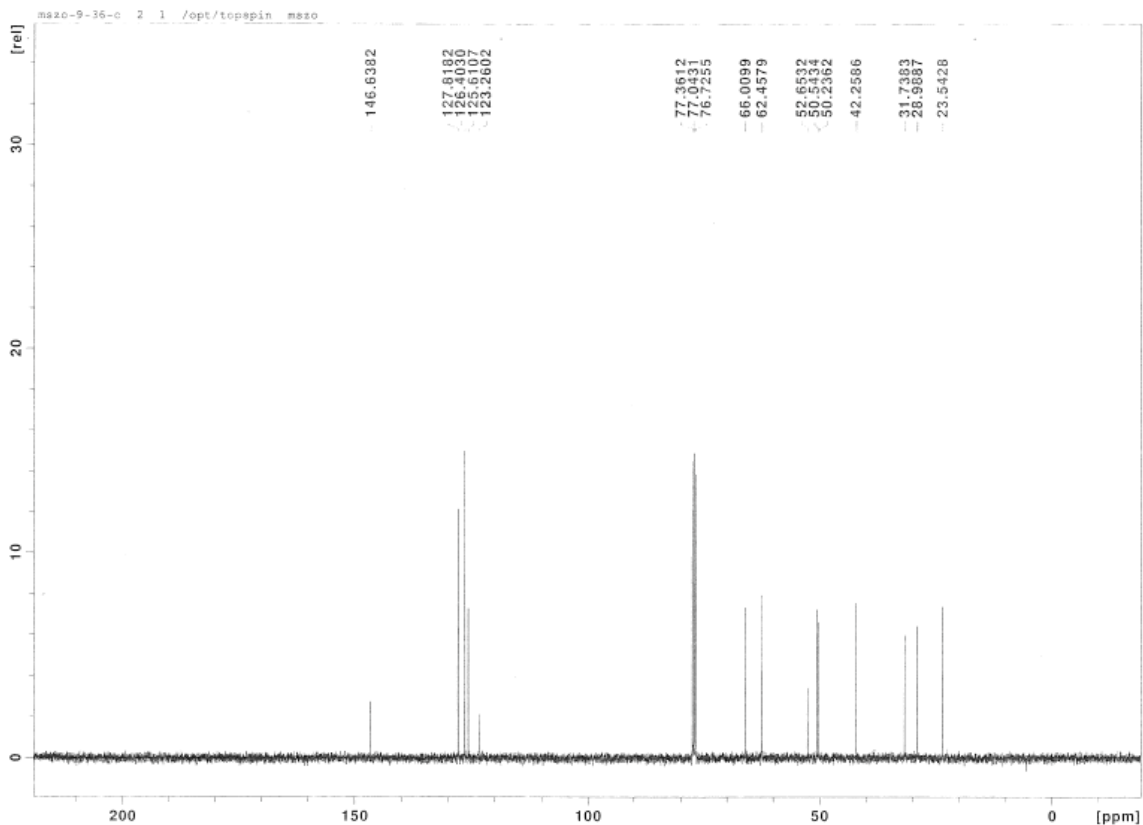

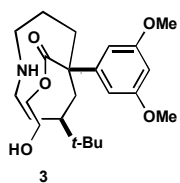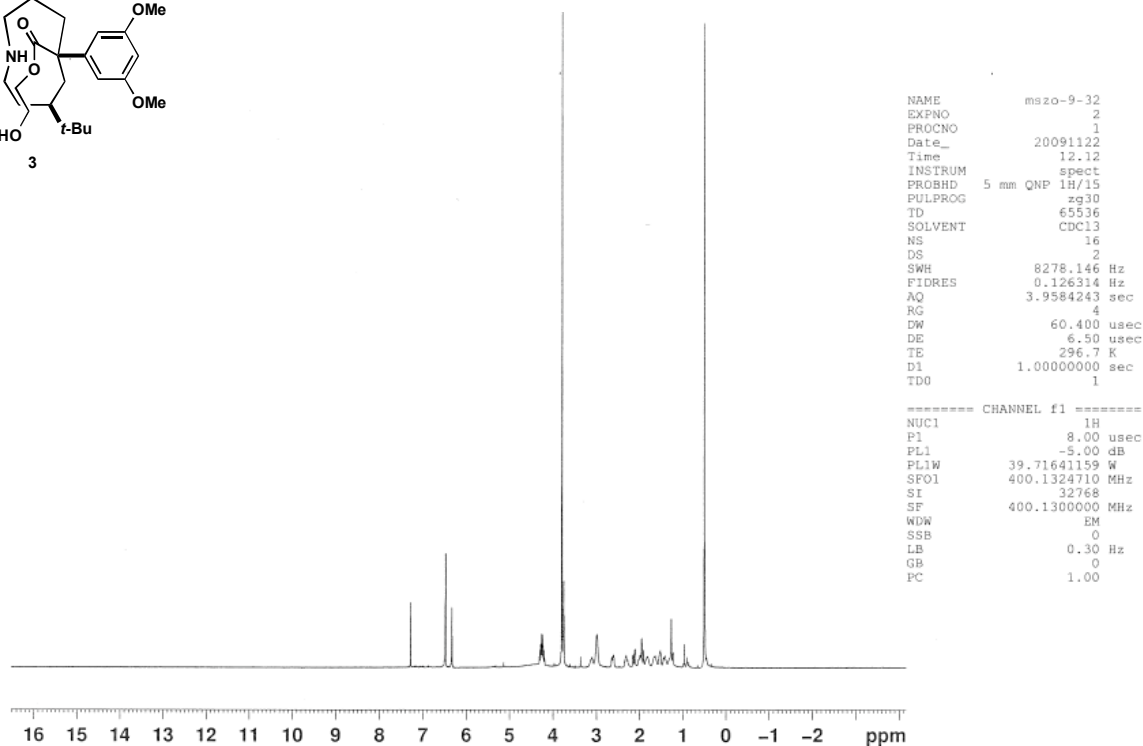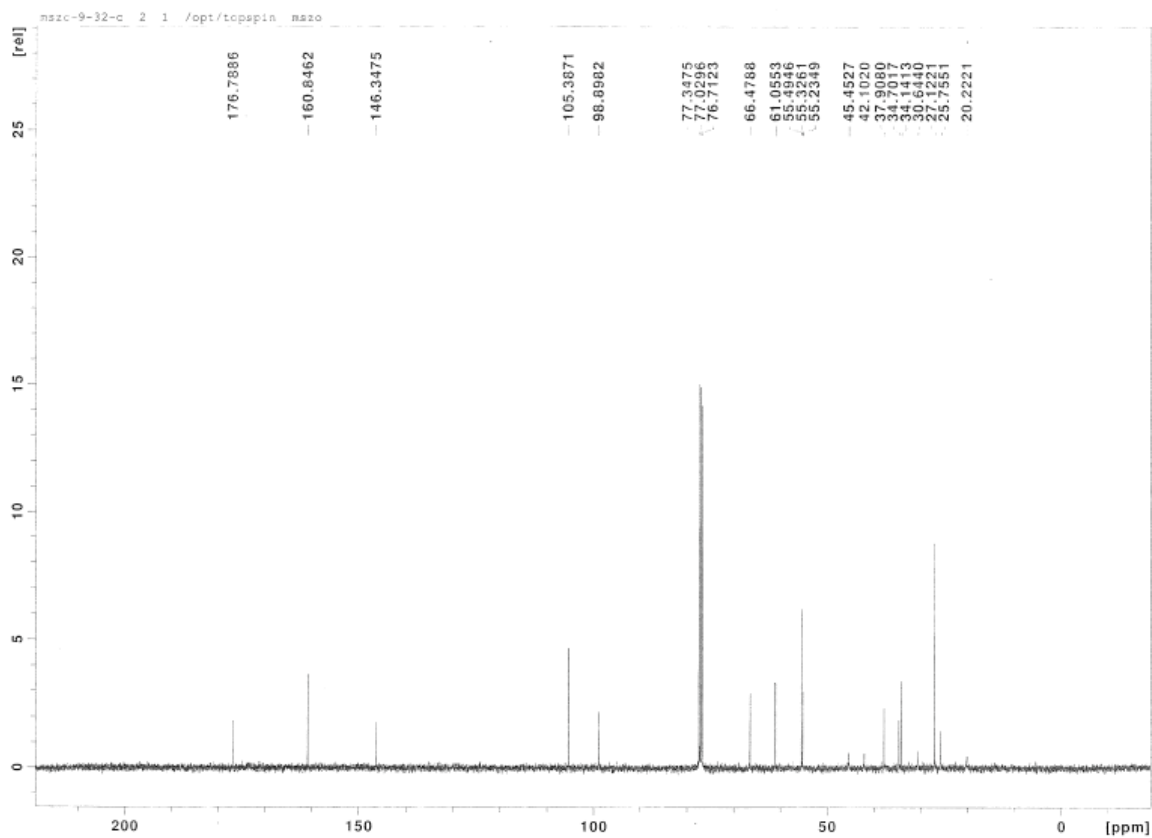



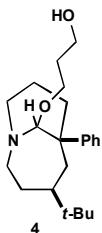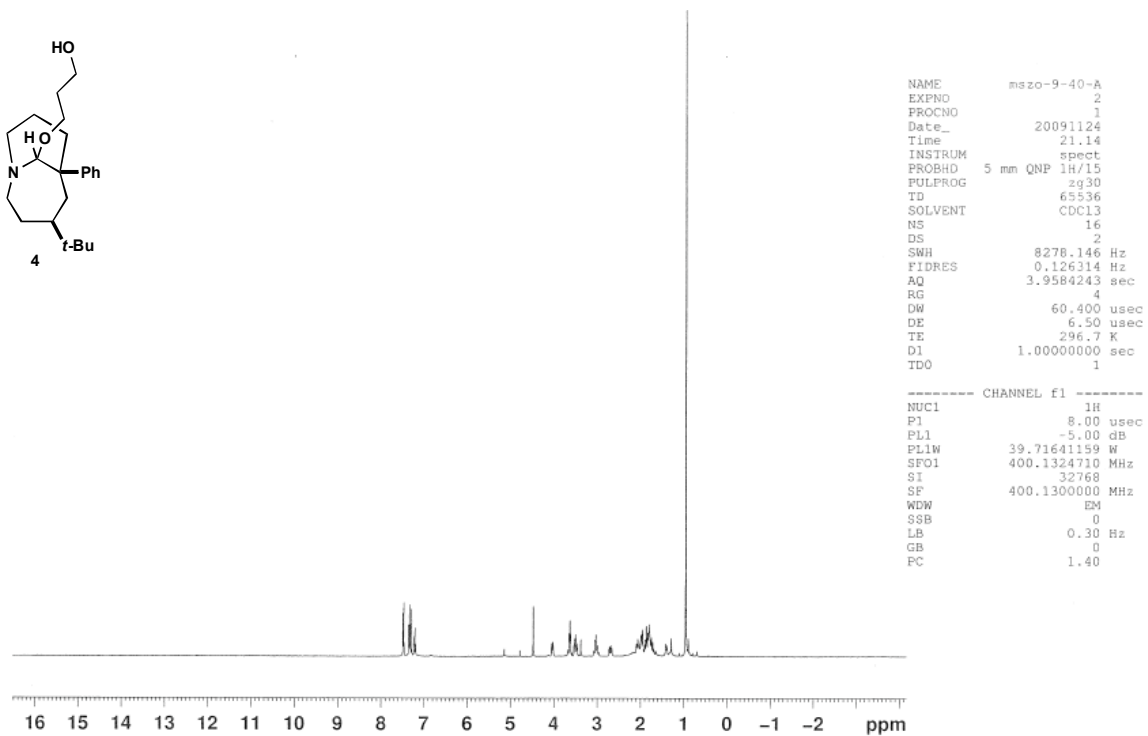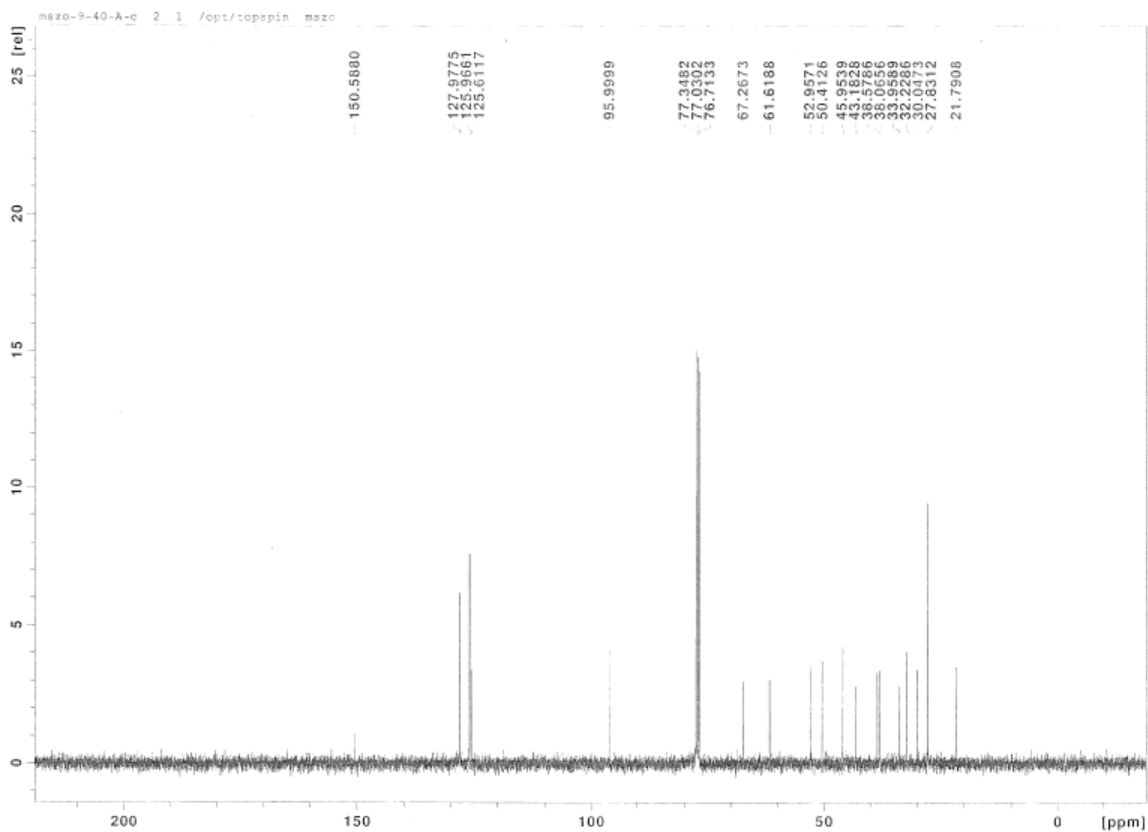

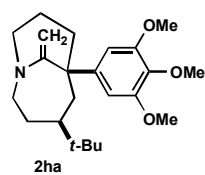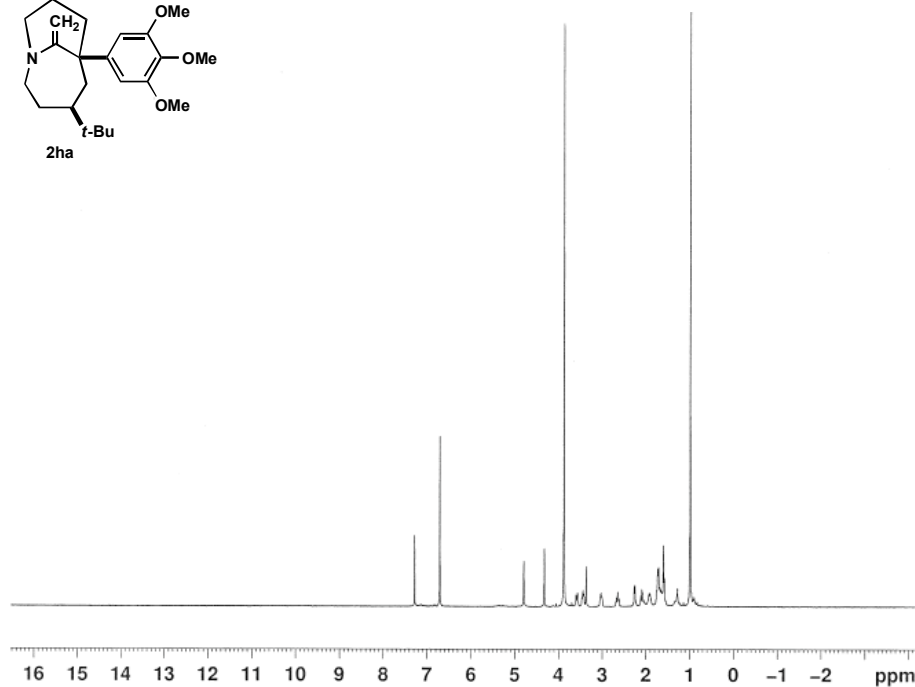

```

NAME      mszo-9-54-A
EXPNO     1
PROCNO    1
Date_     20091128
Time      18.16
INSTRUM   spect
PROBHD    5 mm QNP 1H/15
PULPROG   zg30
TD         65536
SOLVENT   CDCl3
NS         16
DS         2
SWH        8278.146 Hz
FIDRES     0.126314 Hz
AQ         3.9584243 sec
RG         4
DW         60.400 usec
DE         6.50 usec
TE         296.7 K
D1         1.00000000 sec
TD0        1

----- CHANNEL f1 -----
NUC1      1H
P1         8.00 usec
PL1        -5.00 dB
PL1W      39.71641159 W
SFO1      400.1324710 MHz
SI         32768
SF         400.1300000 MHz
WDW        EM
SSB         0
LB         0.30 Hz
GB         0
PC         1.40
    
```

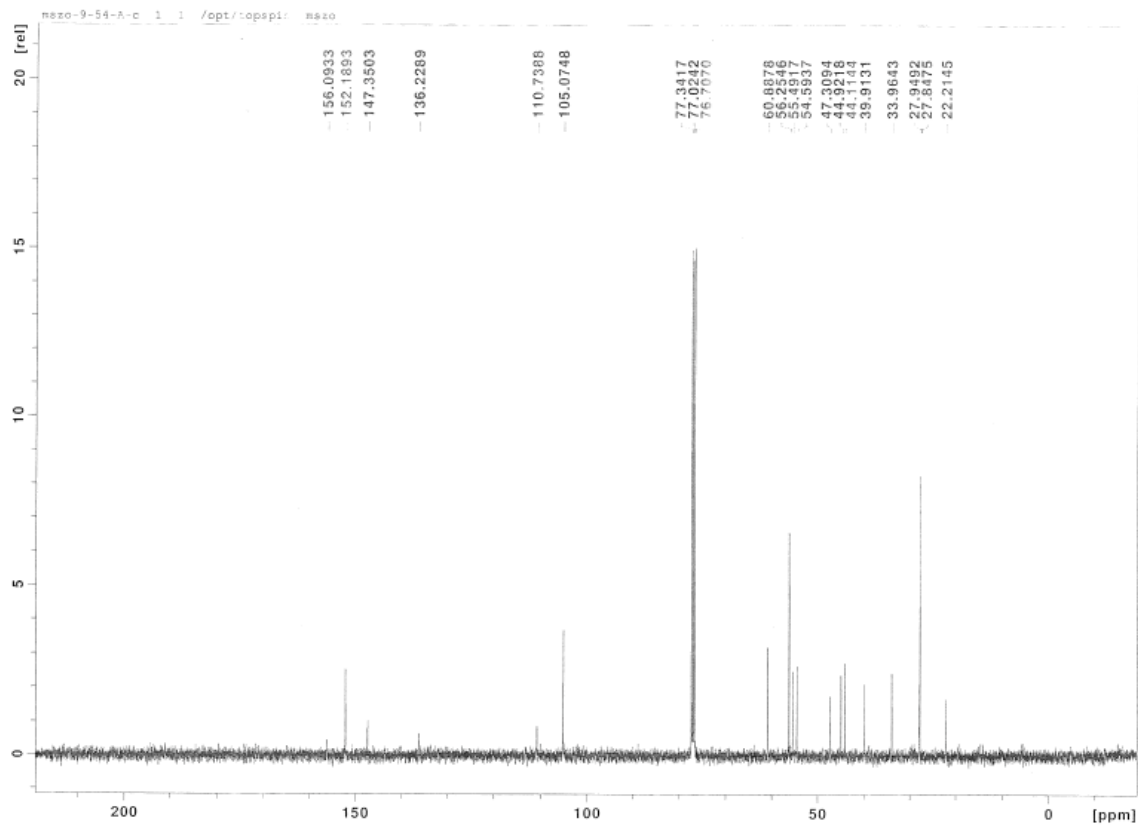

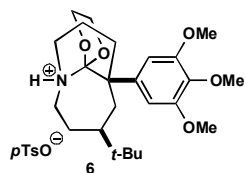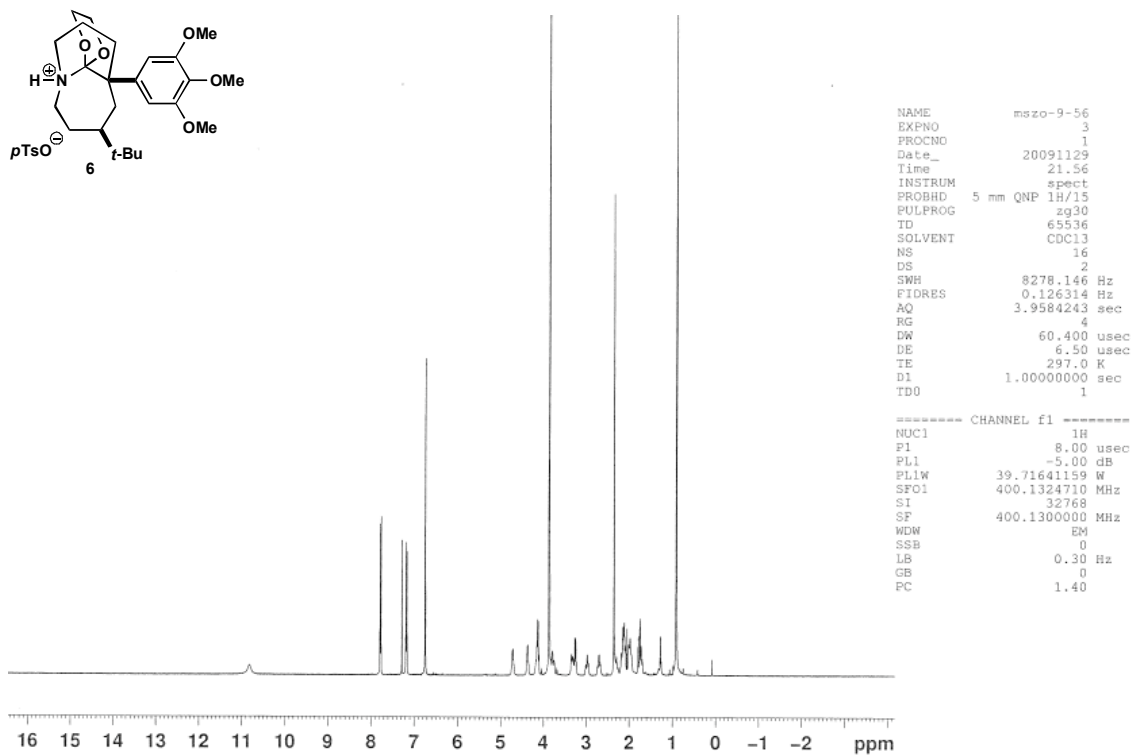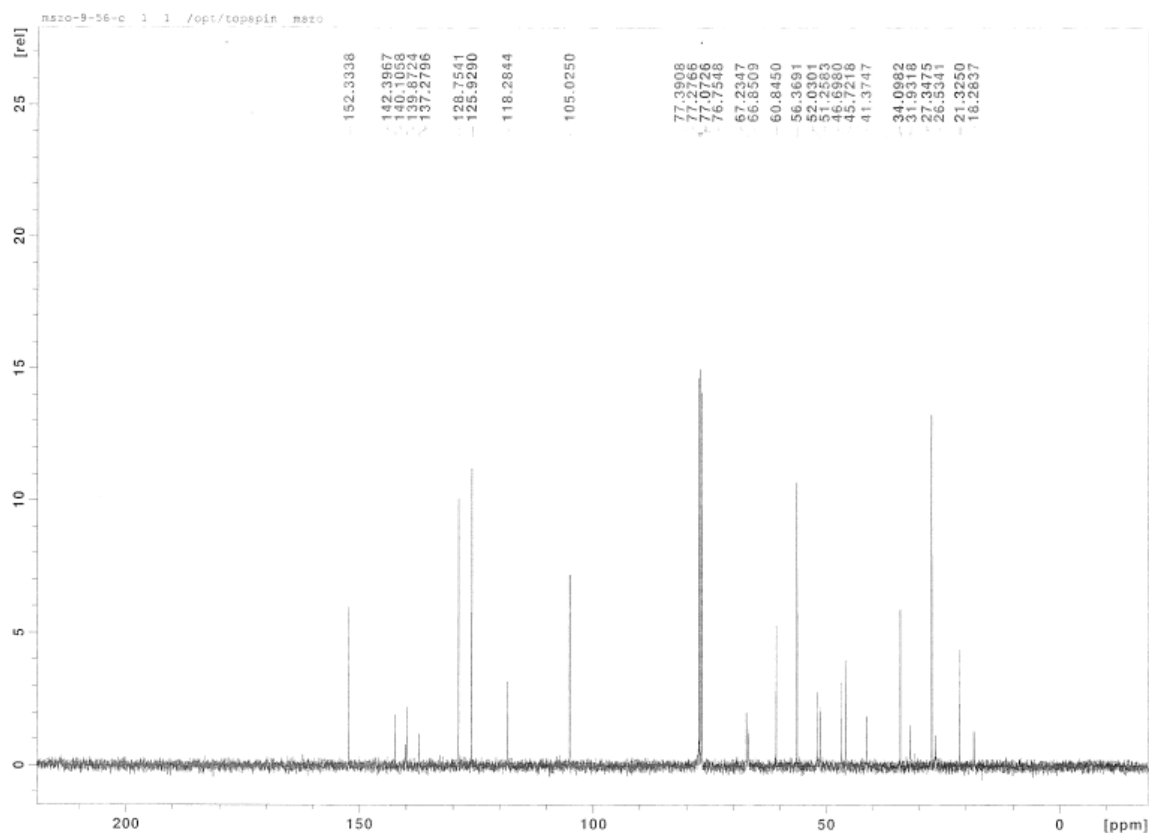

Supplement: NIHMS176747-supplement-1_si_001.pdf [file NIHMS176747-supplement-1_si_001.pdf]
